# Supplementary material for: SET-9 and SET-26 are H3K4me3 readers and play critical roles in germline development and longevity
Source: eLife. 2018 May 1;7:e34970. doi: 10.7554/eLife.34970 (PMC6010342; doi:10.7554/eLife.34970)
Supplement: Supplementary file 2. [file elife-34970-supp2.xlsx]

## Sheet: SET-9 & 26ChIP target
SET-9 & 26 ChIP targets
WBGene00000039
WBGene00000041
WBGene00000055
WBGene00000057
WBGene00000063
WBGene00000064
WBGene00000065
WBGene00000066
WBGene00000067
WBGene00000068
WBGene00000070
WBGene00000080
WBGene00000084
WBGene00000088
WBGene00000092
WBGene00000093
WBGene00000094
WBGene00000095
WBGene00000097
WBGene00000098
WBGene00000100
WBGene00000101
WBGene00000102
WBGene00000105
WBGene00000106
WBGene00000107
WBGene00000109
WBGene00000110
WBGene00000112
WBGene00000113
WBGene00000114
WBGene00000115
WBGene00000117
WBGene00000121
WBGene00000122
WBGene00000140
WBGene00000145
WBGene00000147
WBGene00000148
WBGene00000149
WBGene00000150
WBGene00000151
WBGene00000157
WBGene00000159
WBGene00000160
WBGene00000161
WBGene00000163
WBGene00000165
WBGene00000177
WBGene00000181
WBGene00000182
WBGene00000183
WBGene00000187
WBGene00000189
WBGene00000190
WBGene00000196
WBGene00000197
WBGene00000198
WBGene00000199
WBGene00000201
WBGene00000205
WBGene00000206
WBGene00000208
WBGene00000223
WBGene00000225
WBGene00000227
WBGene00000228
WBGene00000229
WBGene00000230
WBGene00000231
WBGene00000233
WBGene00000236
WBGene00000248
WBGene00000250
WBGene00000251
WBGene00000252
WBGene00000255
WBGene00000256
WBGene00000257
WBGene00000263
WBGene00000264
WBGene00000265
WBGene00000268
WBGene00000270
WBGene00000273
WBGene00000274
WBGene00000276
WBGene00000277
WBGene00000279
WBGene00000282
WBGene00000285
WBGene00000292
WBGene00000293
WBGene00000298
WBGene00000366
WBGene00000369
WBGene00000371
WBGene00000376
WBGene00000377
WBGene00000380
WBGene00000381
WBGene00000382
WBGene00000405
WBGene00000407
WBGene00000408
WBGene00000409
WBGene00000413
WBGene00000414
WBGene00000419
WBGene00000421
WBGene00000423
WBGene00000426
WBGene00000448
WBGene00000459
WBGene00000463
WBGene00000465
WBGene00000466
WBGene00000467
WBGene00000473
WBGene00000474
WBGene00000479
WBGene00000480
WBGene00000496
WBGene00000498
WBGene00000499
WBGene00000500
WBGene00000502
WBGene00000506
WBGene00000507
WBGene00000508
WBGene00000509
WBGene00000518
WBGene00000519
WBGene00000528
WBGene00000533
WBGene00000536
WBGene00000543
WBGene00000545
WBGene00000547
WBGene00000548
WBGene00000549
WBGene00000552
WBGene00000567
WBGene00000583
WBGene00000585
WBGene00000591
WBGene00000594
WBGene00000599
WBGene00000601
WBGene00000602
WBGene00000603
WBGene00000606
WBGene00000609
WBGene00000615
WBGene00000625
WBGene00000626
WBGene00000631
WBGene00000639
WBGene00000647
WBGene00000649
WBGene00000652
WBGene00000653
WBGene00000657
WBGene00000665
WBGene00000667
WBGene00000672
WBGene00000674
WBGene00000678
WBGene00000681
WBGene00000683
WBGene00000685
WBGene00000691
WBGene00000694
WBGene00000696
WBGene00000698
WBGene00000699
WBGene00000702
WBGene00000704
WBGene00000711
WBGene00000712
WBGene00000717
WBGene00000718
WBGene00000726
WBGene00000734
WBGene00000735
WBGene00000748
WBGene00000761
WBGene00000763
WBGene00000773
WBGene00000774
WBGene00000776
WBGene00000777
WBGene00000788
WBGene00000793
WBGene00000796
WBGene00000800
WBGene00000802
WBGene00000813
WBGene00000814
WBGene00000816
WBGene00000817
WBGene00000818
WBGene00000831
WBGene00000833
WBGene00000834
WBGene00000835
WBGene00000836
WBGene00000837
WBGene00000843
WBGene00000846
WBGene00000854
WBGene00000865
WBGene00000869
WBGene00000872
WBGene00000875
WBGene00000876
WBGene00000877
WBGene00000878
WBGene00000879
WBGene00000880
WBGene00000881
WBGene00000883
WBGene00000885
WBGene00000886
WBGene00000887
WBGene00000888
WBGene00000889
WBGene00000890
WBGene00000891
WBGene00000892
WBGene00000901
WBGene00000908
WBGene00000910
WBGene00000911
WBGene00000912
WBGene00000913
WBGene00000914
WBGene00000915
WBGene00000923
WBGene00000931
WBGene00000940
WBGene00000941
WBGene00000942
WBGene00000950
WBGene00000965
WBGene00000970
WBGene00000974
WBGene00000980
WBGene00000985
WBGene00000987
WBGene00000988
WBGene00000995
WBGene00000996
WBGene00001001
WBGene00001002
WBGene00001005
WBGene00001007
WBGene00001008
WBGene00001016
WBGene00001017
WBGene00001018
WBGene00001022
WBGene00001023
WBGene00001027
WBGene00001028
WBGene00001030
WBGene00001031
WBGene00001033
WBGene00001034
WBGene00001037
WBGene00001038
WBGene00001040
WBGene00001042
WBGene00001046
WBGene00001047
WBGene00001049
WBGene00001050
WBGene00001056
WBGene00001058
WBGene00001060
WBGene00001064
WBGene00001066
WBGene00001067
WBGene00001071
WBGene00001073
WBGene00001074
WBGene00001080
WBGene00001085
WBGene00001087
WBGene00001089
WBGene00001090
WBGene00001093
WBGene00001094
WBGene00001102
WBGene00001112
WBGene00001113
WBGene00001116
WBGene00001119
WBGene00001121
WBGene00001127
WBGene00001131
WBGene00001132
WBGene00001134
WBGene00001137
WBGene00001145
WBGene00001151
WBGene00001154
WBGene00001155
WBGene00001161
WBGene00001166
WBGene00001167
WBGene00001168
WBGene00001169
WBGene00001172
WBGene00001173
WBGene00001178
WBGene00001179
WBGene00001182
WBGene00001189
WBGene00001194
WBGene00001196
WBGene00001208
WBGene00001214
WBGene00001215
WBGene00001224
WBGene00001225
WBGene00001226
WBGene00001227
WBGene00001228
WBGene00001229
WBGene00001230
WBGene00001232
WBGene00001235
WBGene00001241
WBGene00001242
WBGene00001243
WBGene00001258
WBGene00001262
WBGene00001284
WBGene00001303
WBGene00001309
WBGene00001324
WBGene00001329
WBGene00001330
WBGene00001331
WBGene00001332
WBGene00001333
WBGene00001334
WBGene00001337
WBGene00001338
WBGene00001340
WBGene00001345
WBGene00001352
WBGene00001358
WBGene00001368
WBGene00001371
WBGene00001393
WBGene00001394
WBGene00001395
WBGene00001398
WBGene00001402
WBGene00001404
WBGene00001405
WBGene00001411
WBGene00001412
WBGene00001423
WBGene00001426
WBGene00001428
WBGene00001430
WBGene00001433
WBGene00001441
WBGene00001443
WBGene00001459
WBGene00001479
WBGene00001480
WBGene00001485
WBGene00001486
WBGene00001488
WBGene00001491
WBGene00001493
WBGene00001495
WBGene00001496
WBGene00001497
WBGene00001498
WBGene00001501
WBGene00001502
WBGene00001503
WBGene00001509
WBGene00001523
WBGene00001526
WBGene00001553
WBGene00001558
WBGene00001559
WBGene00001561
WBGene00001562
WBGene00001563
WBGene00001564
WBGene00001565
WBGene00001566
WBGene00001570
WBGene00001571
WBGene00001574
WBGene00001580
WBGene00001582
WBGene00001585
WBGene00001590
WBGene00001596
WBGene00001601
WBGene00001606
WBGene00001613
WBGene00001615
WBGene00001623
WBGene00001624
WBGene00001630
WBGene00001631
WBGene00001632
WBGene00001633
WBGene00001635
WBGene00001647
WBGene00001648
WBGene00001663
WBGene00001666
WBGene00001679
WBGene00001680
WBGene00001683
WBGene00001684
WBGene00001685
WBGene00001686
WBGene00001688
WBGene00001694
WBGene00001708
WBGene00001711
WBGene00001714
WBGene00001716
WBGene00001719
WBGene00001724
WBGene00001725
WBGene00001744
WBGene00001745
WBGene00001746
WBGene00001748
WBGene00001749
WBGene00001794
WBGene00001805
WBGene00001808
WBGene00001813
WBGene00001815
WBGene00001816
WBGene00001827
WBGene00001829
WBGene00001831
WBGene00001832
WBGene00001833
WBGene00001835
WBGene00001836
WBGene00001838
WBGene00001851
WBGene00001853
WBGene00001864
WBGene00001872
WBGene00001874
WBGene00001875
WBGene00001876
WBGene00001877
WBGene00001878
WBGene00001879
WBGene00001885
WBGene00001890
WBGene00001898
WBGene00001899
WBGene00001909
WBGene00001910
WBGene00001911
WBGene00001915
WBGene00001919
WBGene00001921
WBGene00001922
WBGene00001933
WBGene00001934
WBGene00001935
WBGene00001936
WBGene00001937
WBGene00001938
WBGene00001941
WBGene00001942
WBGene00001946
WBGene00001955
WBGene00001971
WBGene00001972
WBGene00001974
WBGene00001975
WBGene00001976
WBGene00001977
WBGene00001979
WBGene00001980
WBGene00001983
WBGene00001986
WBGene00001993
WBGene00001996
WBGene00001997
WBGene00001998
WBGene00001999
WBGene00002000
WBGene00002003
WBGene00002005
WBGene00002007
WBGene00002008
WBGene00002010
WBGene00002012
WBGene00002025
WBGene00002026
WBGene00002027
WBGene00002028
WBGene00002029
WBGene00002036
WBGene00002045
WBGene00002047
WBGene00002048
WBGene00002053
WBGene00002056
WBGene00002059
WBGene00002060
WBGene00002064
WBGene00002065
WBGene00002066
WBGene00002068
WBGene00002069
WBGene00002070
WBGene00002071
WBGene00002073
WBGene00002074
WBGene00002075
WBGene00002076
WBGene00002077
WBGene00002079
WBGene00002080
WBGene00002083
WBGene00002100
WBGene00002116
WBGene00002120
WBGene00002129
WBGene00002133
WBGene00002142
WBGene00002147
WBGene00002152
WBGene00002153
WBGene00002169
WBGene00002179
WBGene00002182
WBGene00002184
WBGene00002185
WBGene00002187
WBGene00002189
WBGene00002191
WBGene00002192
WBGene00002196
WBGene00002198
WBGene00002201
WBGene00002203
WBGene00002207
WBGene00002210
WBGene00002215
WBGene00002219
WBGene00002223
WBGene00002225
WBGene00002226
WBGene00002228
WBGene00002229
WBGene00002240
WBGene00002241
WBGene00002244
WBGene00002245
WBGene00002247
WBGene00002250
WBGene00002256
WBGene00002258
WBGene00002261
WBGene00002262
WBGene00002263
WBGene00002264
WBGene00002269
WBGene00002273
WBGene00002274
WBGene00002275
WBGene00002280
WBGene00002297
WBGene00002324
WBGene00002344
WBGene00002363
WBGene00002497
WBGene00002583
WBGene00002637
WBGene00002696
WBGene00002717
WBGene00002783
WBGene00002804
WBGene00002845
WBGene00002850
WBGene00002855
WBGene00002879
WBGene00002889
WBGene00002891
WBGene00002915
WBGene00002957
WBGene00002975
WBGene00002978
WBGene00002980
WBGene00002981
WBGene00002990
WBGene00002994
WBGene00002996
WBGene00002998
WBGene00002999
WBGene00003001
WBGene00003002
WBGene00003003
WBGene00003006
WBGene00003010
WBGene00003011
WBGene00003012
WBGene00003014
WBGene00003015
WBGene00003021
WBGene00003025
WBGene00003029
WBGene00003030
WBGene00003031
WBGene00003035
WBGene00003036
WBGene00003038
WBGene00003040
WBGene00003041
WBGene00003044
WBGene00003045
WBGene00003048
WBGene00003057
WBGene00003061
WBGene00003062
WBGene00003064
WBGene00003065
WBGene00003066
WBGene00003077
WBGene00003078
WBGene00003079
WBGene00003080
WBGene00003081
WBGene00003082
WBGene00003085
WBGene00003087
WBGene00003089
WBGene00003100
WBGene00003107
WBGene00003119
WBGene00003123
WBGene00003124
WBGene00003129
WBGene00003130
WBGene00003132
WBGene00003136
WBGene00003142
WBGene00003144
WBGene00003148
WBGene00003150
WBGene00003153
WBGene00003155
WBGene00003156
WBGene00003157
WBGene00003158
WBGene00003159
WBGene00003160
WBGene00003161
WBGene00003162
WBGene00003163
WBGene00003170
WBGene00003172
WBGene00003177
WBGene00003178
WBGene00003182
WBGene00003183
WBGene00003184
WBGene00003186
WBGene00003214
WBGene00003218
WBGene00003220
WBGene00003224
WBGene00003225
WBGene00003232
WBGene00003234
WBGene00003241
WBGene00003243
WBGene00003253
WBGene00003258
WBGene00003367
WBGene00003372
WBGene00003373
WBGene00003375
WBGene00003387
WBGene00003388
WBGene00003391
WBGene00003392
WBGene00003394
WBGene00003397
WBGene00003401
WBGene00003404
WBGene00003405
WBGene00003406
WBGene00003417
WBGene00003426
WBGene00003458
WBGene00003475
WBGene00003476
WBGene00003478
WBGene00003479
WBGene00003482
WBGene00003499
WBGene00003508
WBGene00003511
WBGene00003519
WBGene00003548
WBGene00003552
WBGene00003559
WBGene00003562
WBGene00003564
WBGene00003566
WBGene00003571
WBGene00003572
WBGene00003579
WBGene00003580
WBGene00003583
WBGene00003584
WBGene00003586
WBGene00003589
WBGene00003593
WBGene00003594
WBGene00003600
WBGene00003602
WBGene00003607
WBGene00003610
WBGene00003616
WBGene00003618
WBGene00003622
WBGene00003630
WBGene00003634
WBGene00003636
WBGene00003637
WBGene00003639
WBGene00003651
WBGene00003656
WBGene00003658
WBGene00003690
WBGene00003692
WBGene00003704
WBGene00003720
WBGene00003736
WBGene00003742
WBGene00003753
WBGene00003756
WBGene00003764
WBGene00003769
WBGene00003771
WBGene00003776
WBGene00003777
WBGene00003785
WBGene00003788
WBGene00003789
WBGene00003790
WBGene00003791
WBGene00003792
WBGene00003793
WBGene00003794
WBGene00003795
WBGene00003799
WBGene00003802
WBGene00003803
WBGene00003804
WBGene00003805
WBGene00003806
WBGene00003813
WBGene00003815
WBGene00003821
WBGene00003822
WBGene00003825
WBGene00003826
WBGene00003827
WBGene00003830
WBGene00003831
WBGene00003834
WBGene00003836
WBGene00003847
WBGene00003858
WBGene00003864
WBGene00003865
WBGene00003868
WBGene00003878
WBGene00003882
WBGene00003884
WBGene00003889
WBGene00003891
WBGene00003898
WBGene00003901
WBGene00003902
WBGene00003903
WBGene00003904
WBGene00003905
WBGene00003914
WBGene00003915
WBGene00003916
WBGene00003917
WBGene00003920
WBGene00003921
WBGene00003923
WBGene00003924
WBGene00003925
WBGene00003926
WBGene00003928
WBGene00003929
WBGene00003931
WBGene00003932
WBGene00003936
WBGene00003941
WBGene00003947
WBGene00003948
WBGene00003949
WBGene00003950
WBGene00003951
WBGene00003952
WBGene00003953
WBGene00003955
WBGene00003961
WBGene00003962
WBGene00003963
WBGene00003964
WBGene00003965
WBGene00003966
WBGene00003970
WBGene00003975
WBGene00003978
WBGene00003987
WBGene00003992
WBGene00003993
WBGene00004015
WBGene00004023
WBGene00004025
WBGene00004027
WBGene00004028
WBGene00004030
WBGene00004032
WBGene00004033
WBGene00004034
WBGene00004041
WBGene00004046
WBGene00004047
WBGene00004050
WBGene00004062
WBGene00004064
WBGene00004075
WBGene00004076
WBGene00004078
WBGene00004085
WBGene00004086
WBGene00004089
WBGene00004090
WBGene00004091
WBGene00004093
WBGene00004095
WBGene00004105
WBGene00004106
WBGene00004111
WBGene00004116
WBGene00004117
WBGene00004120
WBGene00004128
WBGene00004130
WBGene00004131
WBGene00004134
WBGene00004135
WBGene00004136
WBGene00004140
WBGene00004143
WBGene00004147
WBGene00004148
WBGene00004152
WBGene00004154
WBGene00004166
WBGene00004167
WBGene00004178
WBGene00004179
WBGene00004180
WBGene00004181
WBGene00004182
WBGene00004183
WBGene00004185
WBGene00004186
WBGene00004187
WBGene00004188
WBGene00004189
WBGene00004190
WBGene00004191
WBGene00004199
WBGene00004203
WBGene00004204
WBGene00004205
WBGene00004208
WBGene00004210
WBGene00004213
WBGene00004214
WBGene00004216
WBGene00004217
WBGene00004226
WBGene00004227
WBGene00004228
WBGene00004232
WBGene00004241
WBGene00004248
WBGene00004254
WBGene00004256
WBGene00004259
WBGene00004264
WBGene00004266
WBGene00004267
WBGene00004268
WBGene00004274
WBGene00004277
WBGene00004279
WBGene00004283
WBGene00004284
WBGene00004296
WBGene00004298
WBGene00004300
WBGene00004302
WBGene00004312
WBGene00004314
WBGene00004315
WBGene00004317
WBGene00004318
WBGene00004321
WBGene00004322
WBGene00004323
WBGene00004324
WBGene00004326
WBGene00004333
WBGene00004336
WBGene00004338
WBGene00004339
WBGene00004340
WBGene00004341
WBGene00004342
WBGene00004343
WBGene00004347
WBGene00004348
WBGene00004357
WBGene00004360
WBGene00004361
WBGene00004363
WBGene00004367
WBGene00004368
WBGene00004373
WBGene00004375
WBGene00004378
WBGene00004383
WBGene00004385
WBGene00004386
WBGene00004388
WBGene00004389
WBGene00004391
WBGene00004394
WBGene00004395
WBGene00004397
WBGene00004398
WBGene00004403
WBGene00004404
WBGene00004405
WBGene00004408
WBGene00004409
WBGene00004410
WBGene00004411
WBGene00004412
WBGene00004413
WBGene00004414
WBGene00004415
WBGene00004416
WBGene00004417
WBGene00004418
WBGene00004419
WBGene00004420
WBGene00004421
WBGene00004422
WBGene00004424
WBGene00004425
WBGene00004426
WBGene00004427
WBGene00004428
WBGene00004429
WBGene00004430
WBGene00004431
WBGene00004432
WBGene00004433
WBGene00004434
WBGene00004435
WBGene00004436
WBGene00004437
WBGene00004439
WBGene00004440
WBGene00004441
WBGene00004442
WBGene00004443
WBGene00004444
WBGene00004445
WBGene00004446
WBGene00004447
WBGene00004448
WBGene00004449
WBGene00004450
WBGene00004452
WBGene00004453
WBGene00004454
WBGene00004456
WBGene00004458
WBGene00004459
WBGene00004460
WBGene00004461
WBGene00004462
WBGene00004463
WBGene00004464
WBGene00004465
WBGene00004466
WBGene00004467
WBGene00004468
WBGene00004469
WBGene00004470
WBGene00004471
WBGene00004473
WBGene00004475
WBGene00004476
WBGene00004478
WBGene00004479
WBGene00004480
WBGene00004481
WBGene00004482
WBGene00004483
WBGene00004484
WBGene00004485
WBGene00004486
WBGene00004487
WBGene00004488
WBGene00004489
WBGene00004490
WBGene00004491
WBGene00004492
WBGene00004494
WBGene00004495
WBGene00004496
WBGene00004498
WBGene00004499
WBGene00004501
WBGene00004502
WBGene00004504
WBGene00004506
WBGene00004508
WBGene00004510
WBGene00004679
WBGene00004680
WBGene00004698
WBGene00004699
WBGene00004700
WBGene00004702
WBGene00004703
WBGene00004704
WBGene00004705
WBGene00004721
WBGene00004732
WBGene00004736
WBGene00004739
WBGene00004744
WBGene00004751
WBGene00004752
WBGene00004754
WBGene00004755
WBGene00004760
WBGene00004762
WBGene00004765
WBGene00004766
WBGene00004767
WBGene00004768
WBGene00004782
WBGene00004783
WBGene00004788
WBGene00004793
WBGene00004798
WBGene00004800
WBGene00004803
WBGene00004804
WBGene00004824
WBGene00004855
WBGene00004856
WBGene00004873
WBGene00004874
WBGene00004881
WBGene00004885
WBGene00004886
WBGene00004887
WBGene00004891
WBGene00004894
WBGene00004895
WBGene00004896
WBGene00004897
WBGene00004904
WBGene00004913
WBGene00004914
WBGene00004916
WBGene00004917
WBGene00004919
WBGene00004920
WBGene00004922
WBGene00004924
WBGene00004928
WBGene00004929
WBGene00004930
WBGene00004931
WBGene00004933
WBGene00004945
WBGene00004946
WBGene00004951
WBGene00004953
WBGene00004955
WBGene00004959
WBGene00004960
WBGene00004963
WBGene00004966
WBGene00004974
WBGene00004975
WBGene00004978
WBGene00004980
WBGene00004981
WBGene00004985
WBGene00004986
WBGene00005007
WBGene00005008
WBGene00005009
WBGene00005010
WBGene00005011
WBGene00005012
WBGene00005016
WBGene00005017
WBGene00005018
WBGene00005020
WBGene00005023
WBGene00005025
WBGene00005077
WBGene00005648
WBGene00005662
WBGene00006059
WBGene00006061
WBGene00006062
WBGene00006064
WBGene00006066
WBGene00006307
WBGene00006319
WBGene00006342
WBGene00006344
WBGene00006349
WBGene00006352
WBGene00006353
WBGene00006359
WBGene00006363
WBGene00006368
WBGene00006369
WBGene00006373
WBGene00006379
WBGene00006385
WBGene00006386
WBGene00006389
WBGene00006390
WBGene00006391
WBGene00006395
WBGene00006396
WBGene00006402
WBGene00006404
WBGene00006405
WBGene00006406
WBGene00006410
WBGene00006414
WBGene00006415
WBGene00006433
WBGene00006434
WBGene00006437
WBGene00006439
WBGene00006440
WBGene00006442
WBGene00006443
WBGene00006447
WBGene00006448
WBGene00006460
WBGene00006462
WBGene00006465
WBGene00006466
WBGene00006467
WBGene00006472
WBGene00006473
WBGene00006474
WBGene00006481
WBGene00006492
WBGene00006493
WBGene00006497
WBGene00006499
WBGene00006504
WBGene00006505
WBGene00006510
WBGene00006519
WBGene00006527
WBGene00006528
WBGene00006529
WBGene00006536
WBGene00006537
WBGene00006540
WBGene00006563
WBGene00006565
WBGene00006566
WBGene00006567
WBGene00006571
WBGene00006574
WBGene00006575
WBGene00006576
WBGene00006579
WBGene00006590
WBGene00006592
WBGene00006593
WBGene00006594
WBGene00006595
WBGene00006604
WBGene00006607
WBGene00006608
WBGene00006613
WBGene00006614
WBGene00006617
WBGene00006619
WBGene00006624
WBGene00006626
WBGene00006633
WBGene00006636
WBGene00006648
WBGene00006651
WBGene00006662
WBGene00006665
WBGene00006668
WBGene00006678
WBGene00006697
WBGene00006698
WBGene00006699
WBGene00006700
WBGene00006701
WBGene00006702
WBGene00006703
WBGene00006704
WBGene00006705
WBGene00006706
WBGene00006707
WBGene00006708
WBGene00006709
WBGene00006713
WBGene00006714
WBGene00006715
WBGene00006720
WBGene00006721
WBGene00006722
WBGene00006723
WBGene00006724
WBGene00006725
WBGene00006726
WBGene00006727
WBGene00006728
WBGene00006730
WBGene00006732
WBGene00006733
WBGene00006734
WBGene00006735
WBGene00006736
WBGene00006737
WBGene00006739
WBGene00006740
WBGene00006753
WBGene00006755
WBGene00006759
WBGene00006760
WBGene00006762
WBGene00006763
WBGene00006767
WBGene00006768
WBGene00006769
WBGene00006771
WBGene00006773
WBGene00006777
WBGene00006779
WBGene00006780
WBGene00006781
WBGene00006783
WBGene00006785
WBGene00006787
WBGene00006792
WBGene00006794
WBGene00006796
WBGene00006798
WBGene00006802
WBGene00006803
WBGene00006805
WBGene00006808
WBGene00006814
WBGene00006815
WBGene00006817
WBGene00006819
WBGene00006829
WBGene00006831
WBGene00006833
WBGene00006836
WBGene00006839
WBGene00006840
WBGene00006843
WBGene00006845
WBGene00006856
WBGene00006862
WBGene00006868
WBGene00006876
WBGene00006882
WBGene00006888
WBGene00006889
WBGene00006910
WBGene00006911
WBGene00006912
WBGene00006914
WBGene00006917
WBGene00006918
WBGene00006919
WBGene00006920
WBGene00006921
WBGene00006923
WBGene00006924
WBGene00006931
WBGene00006933
WBGene00006934
WBGene00006935
WBGene00006937
WBGene00006941
WBGene00006947
WBGene00006951
WBGene00006952
WBGene00006955
WBGene00006956
WBGene00006957
WBGene00006959
WBGene00006964
WBGene00006968
WBGene00006975
WBGene00006976
WBGene00006978
WBGene00006984
WBGene00006986
WBGene00006988
WBGene00006993
WBGene00006994
WBGene00006996
WBGene00006997
WBGene00006999
WBGene00007000
WBGene00007001
WBGene00007009
WBGene00007010
WBGene00007012
WBGene00007014
WBGene00007016
WBGene00007017
WBGene00007018
WBGene00007019
WBGene00007022
WBGene00007023
WBGene00007024
WBGene00007026
WBGene00007027
WBGene00007028
WBGene00007029
WBGene00007030
WBGene00007042
WBGene00007043
WBGene00007047
WBGene00007048
WBGene00007053
WBGene00007054
WBGene00007058
WBGene00007089
WBGene00007105
WBGene00007106
WBGene00007107
WBGene00007109
WBGene00007110
WBGene00007111
WBGene00007114
WBGene00007117
WBGene00007119
WBGene00007122
WBGene00007126
WBGene00007128
WBGene00007133
WBGene00007135
WBGene00007136
WBGene00007137
WBGene00007143
WBGene00007144
WBGene00007165
WBGene00007167
WBGene00007168
WBGene00007169
WBGene00007184
WBGene00007186
WBGene00007187
WBGene00007188
WBGene00007189
WBGene00007192
WBGene00007193
WBGene00007195
WBGene00007196
WBGene00007201
WBGene00007207
WBGene00007210
WBGene00007213
WBGene00007217
WBGene00007221
WBGene00007223
WBGene00007227
WBGene00007234
WBGene00007235
WBGene00007236
WBGene00007237
WBGene00007242
WBGene00007256
WBGene00007258
WBGene00007275
WBGene00007299
WBGene00007312
WBGene00007325
WBGene00007329
WBGene00007330
WBGene00007331
WBGene00007332
WBGene00007333
WBGene00007334
WBGene00007352
WBGene00007354
WBGene00007372
WBGene00007374
WBGene00007384
WBGene00007385
WBGene00007390
WBGene00007400
WBGene00007405
WBGene00007419
WBGene00007429
WBGene00007433
WBGene00007435
WBGene00007444
WBGene00007449
WBGene00007463
WBGene00007464
WBGene00007476
WBGene00007488
WBGene00007492
WBGene00007493
WBGene00007499
WBGene00007500
WBGene00007503
WBGene00007504
WBGene00007505
WBGene00007514
WBGene00007533
WBGene00007534
WBGene00007545
WBGene00007554
WBGene00007556
WBGene00007564
WBGene00007574
WBGene00007578
WBGene00007579
WBGene00007581
WBGene00007586
WBGene00007602
WBGene00007603
WBGene00007606
WBGene00007615
WBGene00007616
WBGene00007620
WBGene00007624
WBGene00007625
WBGene00007626
WBGene00007633
WBGene00007637
WBGene00007640
WBGene00007645
WBGene00007647
WBGene00007650
WBGene00007651
WBGene00007668
WBGene00007679
WBGene00007680
WBGene00007681
WBGene00007683
WBGene00007684
WBGene00007697
WBGene00007698
WBGene00007702
WBGene00007707
WBGene00007708
WBGene00007710
WBGene00007711
WBGene00007712
WBGene00007722
WBGene00007744
WBGene00007760
WBGene00007761
WBGene00007762
WBGene00007771
WBGene00007774
WBGene00007780
WBGene00007784
WBGene00007785
WBGene00007786
WBGene00007789
WBGene00007791
WBGene00007800
WBGene00007808
WBGene00007826
WBGene00007841
WBGene00007846
WBGene00007859
WBGene00007882
WBGene00007898
WBGene00007903
WBGene00007907
WBGene00007914
WBGene00007918
WBGene00007921
WBGene00007922
WBGene00007923
WBGene00007924
WBGene00007927
WBGene00007928
WBGene00007939
WBGene00007941
WBGene00007942
WBGene00007952
WBGene00007953
WBGene00007956
WBGene00007969
WBGene00007971
WBGene00007980
WBGene00007983
WBGene00007991
WBGene00007993
WBGene00008006
WBGene00008008
WBGene00008019
WBGene00008034
WBGene00008035
WBGene00008041
WBGene00008052
WBGene00008053
WBGene00008078
WBGene00008079
WBGene00008094
WBGene00008114
WBGene00008117
WBGene00008118
WBGene00008119
WBGene00008120
WBGene00008131
WBGene00008133
WBGene00008136
WBGene00008140
WBGene00008142
WBGene00008143
WBGene00008144
WBGene00008147
WBGene00008149
WBGene00008150
WBGene00008165
WBGene00008176
WBGene00008195
WBGene00008205
WBGene00008206
WBGene00008212
WBGene00008215
WBGene00008224
WBGene00008225
WBGene00008232
WBGene00008237
WBGene00008258
WBGene00008260
WBGene00008273
WBGene00008274
WBGene00008275
WBGene00008316
WBGene00008317
WBGene00008318
WBGene00008330
WBGene00008338
WBGene00008339
WBGene00008340
WBGene00008343
WBGene00008344
WBGene00008348
WBGene00008359
WBGene00008366
WBGene00008370
WBGene00008371
WBGene00008390
WBGene00008398
WBGene00008403
WBGene00008411
WBGene00008419
WBGene00008421
WBGene00008422
WBGene00008426
WBGene00008428
WBGene00008429
WBGene00008430
WBGene00008431
WBGene00008434
WBGene00008436
WBGene00008438
WBGene00008441
WBGene00008442
WBGene00008444
WBGene00008446
WBGene00008448
WBGene00008452
WBGene00008455
WBGene00008457
WBGene00008458
WBGene00008459
WBGene00008480
WBGene00008500
WBGene00008502
WBGene00008503
WBGene00008504
WBGene00008505
WBGene00008506
WBGene00008511
WBGene00008514
WBGene00008528
WBGene00008530
WBGene00008531
WBGene00008532
WBGene00008533
WBGene00008546
WBGene00008547
WBGene00008548
WBGene00008549
WBGene00008555
WBGene00008563
WBGene00008582
WBGene00008583
WBGene00008586
WBGene00008601
WBGene00008605
WBGene00008622
WBGene00008639
WBGene00008642
WBGene00008645
WBGene00008651
WBGene00008652
WBGene00008665
WBGene00008667
WBGene00008670
WBGene00008681
WBGene00008684
WBGene00008687
WBGene00008688
WBGene00008722
WBGene00008733
WBGene00008740
WBGene00008741
WBGene00008742
WBGene00008750
WBGene00008765
WBGene00008766
WBGene00008767
WBGene00008775
WBGene00008777
WBGene00008779
WBGene00008803
WBGene00008806
WBGene00008832
WBGene00008851
WBGene00008852
WBGene00008857
WBGene00008858
WBGene00008860
WBGene00008876
WBGene00008878
WBGene00008882
WBGene00008887
WBGene00008915
WBGene00008918
WBGene00008919
WBGene00008920
WBGene00008921
WBGene00008927
WBGene00008930
WBGene00008944
WBGene00008948
WBGene00008961
WBGene00008964
WBGene00008968
WBGene00008975
WBGene00008990
WBGene00008997
WBGene00008999
WBGene00009002
WBGene00009004
WBGene00009005
WBGene00009007
WBGene00009008
WBGene00009009
WBGene00009010
WBGene00009011
WBGene00009012
WBGene00009013
WBGene00009045
WBGene00009050
WBGene00009051
WBGene00009052
WBGene00009054
WBGene00009064
WBGene00009065
WBGene00009081
WBGene00009082
WBGene00009092
WBGene00009098
WBGene00009100
WBGene00009112
WBGene00009118
WBGene00009119
WBGene00009120
WBGene00009121
WBGene00009122
WBGene00009123
WBGene00009126
WBGene00009130
WBGene00009131
WBGene00009132
WBGene00009133
WBGene00009135
WBGene00009137
WBGene00009138
WBGene00009139
WBGene00009141
WBGene00009142
WBGene00009145
WBGene00009156
WBGene00009157
WBGene00009159
WBGene00009162
WBGene00009163
WBGene00009164
WBGene00009177
WBGene00009178
WBGene00009179
WBGene00009180
WBGene00009182
WBGene00009187
WBGene00009188
WBGene00009189
WBGene00009191
WBGene00009200
WBGene00009207
WBGene00009211
WBGene00009218
WBGene00009219
WBGene00009220
WBGene00009221
WBGene00009224
WBGene00009245
WBGene00009246
WBGene00009254
WBGene00009256
WBGene00009260
WBGene00009262
WBGene00009264
WBGene00009266
WBGene00009270
WBGene00009274
WBGene00009277
WBGene00009284
WBGene00009285
WBGene00009289
WBGene00009290
WBGene00009291
WBGene00009305
WBGene00009307
WBGene00009314
WBGene00009315
WBGene00009318
WBGene00009319
WBGene00009320
WBGene00009322
WBGene00009328
WBGene00009329
WBGene00009330
WBGene00009334
WBGene00009335
WBGene00009336
WBGene00009342
WBGene00009346
WBGene00009364
WBGene00009365
WBGene00009366
WBGene00009368
WBGene00009385
WBGene00009435
WBGene00009436
WBGene00009439
WBGene00009440
WBGene00009443
WBGene00009444
WBGene00009447
WBGene00009448
WBGene00009451
WBGene00009452
WBGene00009453
WBGene00009454
WBGene00009455
WBGene00009456
WBGene00009477
WBGene00009479
WBGene00009499
WBGene00009508
WBGene00009521
WBGene00009532
WBGene00009542
WBGene00009544
WBGene00009551
WBGene00009554
WBGene00009558
WBGene00009559
WBGene00009563
WBGene00009565
WBGene00009578
WBGene00009579
WBGene00009580
WBGene00009584
WBGene00009587
WBGene00009588
WBGene00009628
WBGene00009645
WBGene00009647
WBGene00009649
WBGene00009650
WBGene00009654
WBGene00009660
WBGene00009661
WBGene00009664
WBGene00009666
WBGene00009667
WBGene00009668
WBGene00009671
WBGene00009672
WBGene00009673
WBGene00009677
WBGene00009688
WBGene00009691
WBGene00009713
WBGene00009717
WBGene00009722
WBGene00009723
WBGene00009730
WBGene00009731
WBGene00009732
WBGene00009734
WBGene00009736
WBGene00009738
WBGene00009739
WBGene00009741
WBGene00009745
WBGene00009769
WBGene00009771
WBGene00009772
WBGene00009783
WBGene00009812
WBGene00009829
WBGene00009830
WBGene00009851
WBGene00009879
WBGene00009880
WBGene00009881
WBGene00009883
WBGene00009888
WBGene00009889
WBGene00009920
WBGene00009924
WBGene00009925
WBGene00009926
WBGene00009940
WBGene00009945
WBGene00009947
WBGene00009952
WBGene00009966
WBGene00009974
WBGene00009975
WBGene00009976
WBGene00009981
WBGene00009982
WBGene00009983
WBGene00009984
WBGene00009993
WBGene00009997
WBGene00010002
WBGene00010006
WBGene00010009
WBGene00010011
WBGene00010012
WBGene00010013
WBGene00010015
WBGene00010035
WBGene00010036
WBGene00010037
WBGene00010038
WBGene00010040
WBGene00010041
WBGene00010042
WBGene00010045
WBGene00010047
WBGene00010052
WBGene00010053
WBGene00010054
WBGene00010055
WBGene00010061
WBGene00010075
WBGene00010077
WBGene00010089
WBGene00010094
WBGene00010096
WBGene00010097
WBGene00010117
WBGene00010130
WBGene00010132
WBGene00010139
WBGene00010140
WBGene00010150
WBGene00010155
WBGene00010159
WBGene00010161
WBGene00010177
WBGene00010178
WBGene00010184
WBGene00010191
WBGene00010192
WBGene00010197
WBGene00010198
WBGene00010214
WBGene00010229
WBGene00010230
WBGene00010242
WBGene00010244
WBGene00010260
WBGene00010263
WBGene00010266
WBGene00010279
WBGene00010280
WBGene00010281
WBGene00010283
WBGene00010284
WBGene00010288
WBGene00010290
WBGene00010303
WBGene00010304
WBGene00010305
WBGene00010306
WBGene00010308
WBGene00010309
WBGene00010316
WBGene00010317
WBGene00010333
WBGene00010337
WBGene00010338
WBGene00010339
WBGene00010351
WBGene00010354
WBGene00010357
WBGene00010362
WBGene00010369
WBGene00010406
WBGene00010407
WBGene00010408
WBGene00010409
WBGene00010419
WBGene00010420
WBGene00010421
WBGene00010423
WBGene00010425
WBGene00010428
WBGene00010434
WBGene00010437
[truncated: 2,428 more rows]

## Sheet: set9up
up-regulated gene in set-9 mutant from RNA-seq
WBGene00000019
WBGene00000020
WBGene00000176
WBGene00000373
WBGene00000594
WBGene00000599
WBGene00000616
WBGene00000618
WBGene00000631
WBGene00000665
WBGene00000673
WBGene00000677
WBGene00000681
WBGene00000691
WBGene00000699
WBGene00000717
WBGene00000718
WBGene00000719
WBGene00000720
WBGene00000727
WBGene00000733
WBGene00000739
WBGene00000740
WBGene00000741
WBGene00000742
WBGene00000743
WBGene00000749
WBGene00000753
WBGene00001063
WBGene00001666
WBGene00001699
WBGene00001702
WBGene00001713
WBGene00001730
WBGene00001820
WBGene00001906
WBGene00002064
WBGene00002116
WBGene00002124
WBGene00002199
WBGene00003528
WBGene00003530
WBGene00003545
WBGene00003606
WBGene00003623
WBGene00003675
WBGene00003767
WBGene00003999
WBGene00004000
WBGene00004002
WBGene00004008
WBGene00004119
WBGene00004124
WBGene00004126
WBGene00004154
WBGene00004173
WBGene00004226
WBGene00004227
WBGene00006389
WBGene00006535
WBGene00006591
WBGene00007231
WBGene00007232
WBGene00007233
WBGene00007412
WBGene00007430
WBGene00007460
WBGene00007541
WBGene00007543
WBGene00007804
WBGene00007813
WBGene00007817
WBGene00007835
WBGene00008031
WBGene00008032
WBGene00008553
WBGene00008579
WBGene00008628
WBGene00009081
WBGene00009123
WBGene00009215
WBGene00009787
WBGene00009789
WBGene00009824
WBGene00009895
WBGene00009957
WBGene00010001
WBGene00010123
WBGene00010135
WBGene00010367
WBGene00010497
WBGene00011095
WBGene00011434
WBGene00011522
WBGene00011645
WBGene00011676
WBGene00011680
WBGene00011753
WBGene00011891
WBGene00012388
WBGene00012444
WBGene00012535
WBGene00012538
WBGene00012683
WBGene00012813
WBGene00012910
WBGene00013073
WBGene00013169
WBGene00013257
WBGene00013489
WBGene00013847
WBGene00013853
WBGene00014173
WBGene00015034
WBGene00015660
WBGene00015695
WBGene00015857
WBGene00015894
WBGene00016063
WBGene00016417
WBGene00016424
WBGene00016505
WBGene00016596
WBGene00016659
WBGene00016773
WBGene00016790
WBGene00017305
WBGene00017467
WBGene00017501
WBGene00017569
WBGene00017754
WBGene00018235
WBGene00018353
WBGene00018383
WBGene00018424
WBGene00018538
WBGene00018786
WBGene00018980
WBGene00019311
WBGene00019388
WBGene00019489
WBGene00019730
WBGene00019859
WBGene00019908
WBGene00020049
WBGene00020082
WBGene00020100
WBGene00020182
WBGene00020245
WBGene00020609
WBGene00020811
WBGene00020873
WBGene00020972
WBGene00021083
WBGene00021084
WBGene00021124
WBGene00021236
WBGene00021544
WBGene00021625
WBGene00021660
WBGene00022131
WBGene00022383
WBGene00022725
WBGene00022817
WBGene00044175
WBGene00044206
WBGene00044512
WBGene00044658
WBGene00045457
WBGene00195170

## Sheet: set9down
down-regulated gene in set-9 mutant from RNA-seq
WBGene00000039
WBGene00000220
WBGene00000251
WBGene00000252
WBGene00000256
WBGene00000397
WBGene00000493
WBGene00000503
WBGene00000546
WBGene00000557
WBGene00000597
WBGene00000615
WBGene00000623
WBGene00000625
WBGene00000647
WBGene00000649
WBGene00000655
WBGene00000670
WBGene00000671
WBGene00000675
WBGene00000678
WBGene00000683
WBGene00000684
WBGene00000702
WBGene00000708
WBGene00000716
WBGene00000726
WBGene00000745
WBGene00000747
WBGene00000752
WBGene00000778
WBGene00000853
WBGene00000902
WBGene00000928
WBGene00001059
WBGene00001064
WBGene00001065
WBGene00001066
WBGene00001067
WBGene00001069
WBGene00001070
WBGene00001071
WBGene00001072
WBGene00001073
WBGene00001242
WBGene00001245
WBGene00001399
WBGene00001414
WBGene00001430
WBGene00001570
WBGene00001603
WBGene00001626
WBGene00001690
WBGene00001691
WBGene00001707
WBGene00001714
WBGene00001716
WBGene00001719
WBGene00001723
WBGene00001724
WBGene00001944
WBGene00002130
WBGene00002150
WBGene00002175
WBGene00002285
WBGene00003057
WBGene00003100
WBGene00003388
WBGene00003432
WBGene00003435
WBGene00003438
WBGene00003443
WBGene00003444
WBGene00003452
WBGene00003463
WBGene00003469
WBGene00003470
WBGene00003523
WBGene00003539
WBGene00003543
WBGene00003553
WBGene00003558
WBGene00003572
WBGene00003888
WBGene00003981
WBGene00004036
WBGene00004120
WBGene00004219
WBGene00004230
WBGene00004264
WBGene00004301
WBGene00004397
WBGene00004398
WBGene00004904
WBGene00004960
WBGene00004962
WBGene00004998
WBGene00005016
WBGene00005017
WBGene00005018
WBGene00006038
WBGene00006039
WBGene00006040
WBGene00006051
WBGene00006053
WBGene00006449
WBGene00006666
WBGene00006925
WBGene00006947
WBGene00006948
WBGene00006952
WBGene00006955
WBGene00007080
WBGene00007169
WBGene00007170
WBGene00007174
WBGene00007239
WBGene00007248
WBGene00007264
WBGene00007301
WBGene00007307
WBGene00007308
WBGene00007320
WBGene00007325
WBGene00007343
WBGene00007420
WBGene00007425
WBGene00007489
WBGene00007503
WBGene00007512
WBGene00007530
WBGene00007560
WBGene00007593
WBGene00007610
WBGene00007714
WBGene00007735
WBGene00007794
WBGene00007888
WBGene00007891
WBGene00007916
WBGene00007938
WBGene00007987
WBGene00007996
WBGene00008063
WBGene00008074
WBGene00008079
WBGene00008137
WBGene00008150
WBGene00008260
WBGene00008272
WBGene00008277
WBGene00008376
WBGene00008381
WBGene00008448
WBGene00008477
WBGene00008487
WBGene00008496
WBGene00008508
WBGene00008511
WBGene00008581
WBGene00008605
WBGene00008621
WBGene00008658
WBGene00008662
WBGene00008673
WBGene00008712
WBGene00008727
WBGene00008743
WBGene00008875
WBGene00008964
WBGene00008987
WBGene00009000
WBGene00009024
WBGene00009028
WBGene00009094
WBGene00009149
WBGene00009178
WBGene00009193
WBGene00009218
WBGene00009261
WBGene00009281
WBGene00009308
WBGene00009321
WBGene00009344
WBGene00009438
WBGene00009581
WBGene00009626
WBGene00009643
WBGene00009681
WBGene00009754
WBGene00009791
WBGene00009830
WBGene00009889
WBGene00009926
WBGene00009956
WBGene00009959
WBGene00010010
WBGene00010046
WBGene00010114
WBGene00010285
WBGene00010321
WBGene00010324
WBGene00010327
WBGene00010345
WBGene00010442
WBGene00010466
WBGene00010485
WBGene00010544
WBGene00010573
WBGene00010612
WBGene00010633
WBGene00010651
WBGene00010673
WBGene00010679
WBGene00010763
WBGene00010790
WBGene00010835
WBGene00010876
WBGene00010933
WBGene00010951
WBGene00010969
WBGene00010972
WBGene00011024
WBGene00011077
WBGene00011107
WBGene00011114
WBGene00011120
WBGene00011173
WBGene00011191
WBGene00011393
WBGene00011493
WBGene00011548
WBGene00011590
WBGene00011617
WBGene00011665
WBGene00011748
WBGene00011768
WBGene00011796
WBGene00011827
WBGene00011831
WBGene00011836
WBGene00011910
WBGene00011911
WBGene00011918
WBGene00011971
WBGene00012011
WBGene00012032
WBGene00012046
WBGene00012115
WBGene00012165
WBGene00012186
WBGene00012199
WBGene00012207
WBGene00012212
WBGene00012220
WBGene00012256
WBGene00012257
WBGene00012261
WBGene00012357
WBGene00012429
WBGene00012540
WBGene00012595
WBGene00012635
WBGene00012638
WBGene00012791
WBGene00012796
WBGene00012814
WBGene00012827
WBGene00012837
WBGene00012904
WBGene00012912
WBGene00012917
WBGene00012924
WBGene00012979
WBGene00013085
WBGene00013171
WBGene00013173
WBGene00013263
WBGene00013264
WBGene00013304
WBGene00013318
WBGene00013325
WBGene00013352
WBGene00013474
WBGene00013651
WBGene00013673
WBGene00013693
WBGene00013771
WBGene00013776
WBGene00013785
WBGene00013846
WBGene00013852
WBGene00013879
WBGene00013886
WBGene00013891
WBGene00013931
WBGene00013979
WBGene00013987
WBGene00013999
WBGene00014048
WBGene00014094
WBGene00014123
WBGene00014129
WBGene00014150
WBGene00014179
WBGene00014197
WBGene00014665
WBGene00014667
WBGene00014955
WBGene00014996
WBGene00015024
WBGene00015026
WBGene00015084
WBGene00015089
WBGene00015094
WBGene00015192
WBGene00015193
WBGene00015216
WBGene00015300
WBGene00015348
WBGene00015351
WBGene00015386
WBGene00015422
WBGene00015442
WBGene00015496
WBGene00015510
WBGene00015634
WBGene00015646
WBGene00015683
WBGene00015781
WBGene00015795
WBGene00015820
WBGene00015841
WBGene00015907
WBGene00015910
WBGene00015931
WBGene00015937
WBGene00015944
WBGene00015991
WBGene00015992
WBGene00015994
WBGene00016010
WBGene00016022
WBGene00016029
WBGene00016054
WBGene00016067
WBGene00016084
WBGene00016106
WBGene00016132
WBGene00016133
WBGene00016136
WBGene00016161
WBGene00016247
WBGene00016276
WBGene00016329
WBGene00016356
WBGene00016358
WBGene00016398
WBGene00016416
WBGene00016420
WBGene00016422
WBGene00016440
WBGene00016447
WBGene00016461
WBGene00016462
WBGene00016541
WBGene00016752
WBGene00016800
WBGene00016962
WBGene00017015
WBGene00017018
WBGene00017019
WBGene00017020
WBGene00017179
WBGene00017212
WBGene00017215
WBGene00017243
WBGene00017258
WBGene00017307
WBGene00017384
WBGene00017444
WBGene00017482
WBGene00017483
WBGene00017535
WBGene00017554
WBGene00017559
WBGene00017560
WBGene00017577
WBGene00017678
WBGene00017716
WBGene00017717
WBGene00017814
WBGene00017819
WBGene00017937
WBGene00017963
WBGene00017991
WBGene00017998
WBGene00018039
WBGene00018040
WBGene00018064
WBGene00018113
WBGene00018120
WBGene00018163
WBGene00018215
WBGene00018256
WBGene00018293
WBGene00018300
WBGene00018359
WBGene00018502
WBGene00018547
WBGene00018548
WBGene00018572
WBGene00018591
WBGene00018640
WBGene00018682
WBGene00018706
WBGene00018741
WBGene00018745
WBGene00018809
WBGene00018895
WBGene00018930
WBGene00018965
WBGene00018969
WBGene00019020
WBGene00019030
WBGene00019086
WBGene00019105
WBGene00019148
WBGene00019154
WBGene00019169
WBGene00019194
WBGene00019272
WBGene00019285
WBGene00019374
WBGene00019425
WBGene00019431
WBGene00019459
WBGene00019486
WBGene00019520
WBGene00019564
WBGene00019640
WBGene00019728
WBGene00019913
WBGene00020003
WBGene00020014
WBGene00020019
WBGene00020104
WBGene00020116
WBGene00020149
WBGene00020187
WBGene00020194
WBGene00020281
WBGene00020282
WBGene00020283
WBGene00020388
WBGene00020396
WBGene00020465
WBGene00020483
WBGene00020487
WBGene00020550
WBGene00020560
WBGene00020626
WBGene00020627
WBGene00020659
WBGene00020704
WBGene00020713
WBGene00020786
WBGene00020840
WBGene00020841
WBGene00020846
WBGene00020890
WBGene00020911
WBGene00020990
WBGene00021005
WBGene00021095
WBGene00021110
WBGene00021113
WBGene00021151
WBGene00021186
WBGene00021187
WBGene00021263
WBGene00021265
WBGene00021326
WBGene00021381
WBGene00021471
WBGene00021579
WBGene00021581
WBGene00021633
WBGene00021641
WBGene00021850
WBGene00021870
WBGene00021931
WBGene00022024
WBGene00022033
WBGene00022060
WBGene00022064
WBGene00022090
WBGene00022103
WBGene00022156
WBGene00022160
WBGene00022274
WBGene00022287
WBGene00022415
WBGene00022504
WBGene00022517
WBGene00022577
WBGene00022589
WBGene00022591
WBGene00022611
WBGene00022612
WBGene00022617
WBGene00022621
WBGene00022634
WBGene00022665
WBGene00022705
WBGene00022732
WBGene00022751
WBGene00022822
WBGene00022849
WBGene00023416
WBGene00023451
WBGene00023490
WBGene00043147
WBGene00044062
WBGene00044074
WBGene00044198
WBGene00044213
WBGene00044333
WBGene00044388
WBGene00044445
WBGene00044535
WBGene00044620
WBGene00044623
WBGene00044796
WBGene00044803
WBGene00044912
WBGene00045269
WBGene00045355
WBGene00045484
WBGene00050940
WBGene00050943
WBGene00077636
WBGene00077696
WBGene00077697
WBGene00138711
WBGene00138719
WBGene00185097
WBGene00194659
WBGene00194670
WBGene00195051
WBGene00196684
WBGene00197552
WBGene00198547
WBGene00200662
WBGene00219208
WBGene00219694
WBGene00220261
WBGene00235268
WBGene00235383
WBGene00255598

## Sheet: set26up
up-regulated gene in set-26 mutant from RNA-seq
WBGene00000019
WBGene00000373
WBGene00000594
WBGene00000599
WBGene00000602
WBGene00000616
WBGene00000618
WBGene00000631
WBGene00000641
WBGene00000665
WBGene00000681
WBGene00000691
WBGene00000699
WBGene00000717
WBGene00000718
WBGene00000719
WBGene00000720
WBGene00000723
WBGene00000727
WBGene00000728
WBGene00000729
WBGene00000739
WBGene00000740
WBGene00000741
WBGene00000742
WBGene00000749
WBGene00000750
WBGene00000753
WBGene00001063
WBGene00001109
WBGene00001163
WBGene00001476
WBGene00001663
WBGene00001666
WBGene00001699
WBGene00001702
WBGene00001713
WBGene00001730
WBGene00001772
WBGene00001820
WBGene00001875
WBGene00001876
WBGene00001878
WBGene00001879
WBGene00001880
WBGene00001881
WBGene00001891
WBGene00001892
WBGene00001905
WBGene00001906
WBGene00001914
WBGene00002016
WBGene00002017
WBGene00002018
WBGene00002026
WBGene00002088
WBGene00002120
WBGene00002124
WBGene00002199
WBGene00003031
WBGene00003090
WBGene00003091
WBGene00003522
WBGene00003527
WBGene00003528
WBGene00003545
WBGene00003548
WBGene00003605
WBGene00003623
WBGene00003675
WBGene00003680
WBGene00003761
WBGene00003767
WBGene00003816
WBGene00004002
WBGene00004003
WBGene00004008
WBGene00004096
WBGene00004119
WBGene00004123
WBGene00004124
WBGene00004154
WBGene00004173
WBGene00004226
WBGene00004227
WBGene00004300
WBGene00004437
WBGene00004764
WBGene00005092
WBGene00005833
WBGene00006389
WBGene00006416
WBGene00006464
WBGene00006505
WBGene00006534
WBGene00006535
WBGene00006539
WBGene00006591
WBGene00006599
WBGene00006981
WBGene00007073
WBGene00007177
WBGene00007231
WBGene00007233
WBGene00007397
WBGene00007412
WBGene00007460
WBGene00007537
WBGene00007541
WBGene00007543
WBGene00007660
WBGene00007691
WBGene00007804
WBGene00007817
WBGene00007833
WBGene00007835
WBGene00007903
WBGene00007989
WBGene00008031
WBGene00008032
WBGene00008128
WBGene00008296
WBGene00008449
WBGene00008477
WBGene00008577
WBGene00008584
WBGene00008628
WBGene00008850
WBGene00008944
WBGene00008967
WBGene00009038
WBGene00009081
WBGene00009090
WBGene00009097
WBGene00009123
WBGene00009221
WBGene00009384
WBGene00009397
WBGene00009608
WBGene00009691
WBGene00009710
WBGene00009730
WBGene00009789
WBGene00009957
WBGene00009982
WBGene00009983
WBGene00010001
WBGene00010123
WBGene00010125
WBGene00010127
WBGene00010128
WBGene00010135
WBGene00010215
WBGene00010238
WBGene00010262
WBGene00010289
WBGene00010468
WBGene00010470
WBGene00010473
WBGene00010509
WBGene00010661
WBGene00010705
WBGene00010724
WBGene00010904
WBGene00011009
WBGene00011305
WBGene00011362
WBGene00011522
WBGene00011533
WBGene00011537
WBGene00011674
WBGene00011676
WBGene00011799
WBGene00011844
WBGene00012034
WBGene00012101
WBGene00012130
WBGene00012176
WBGene00012339
WBGene00012388
WBGene00012431
WBGene00012444
WBGene00012535
WBGene00012583
WBGene00012592
WBGene00012728
WBGene00012757
WBGene00012813
WBGene00012824
WBGene00012832
WBGene00013058
WBGene00013169
WBGene00013257
WBGene00013331
WBGene00013418
WBGene00013515
WBGene00013540
WBGene00013847
WBGene00013853
WBGene00013899
WBGene00013947
WBGene00014009
WBGene00014125
WBGene00014173
WBGene00014213
WBGene00015028
WBGene00015034
WBGene00015052
WBGene00015092
WBGene00015117
WBGene00015182
WBGene00015660
WBGene00015758
WBGene00015794
WBGene00015857
WBGene00015878
WBGene00015879
WBGene00015997
WBGene00016063
WBGene00016146
WBGene00016196
WBGene00016209
WBGene00016221
WBGene00016294
WBGene00016407
WBGene00016411
WBGene00016424
WBGene00016483
WBGene00016484
WBGene00016504
WBGene00016505
WBGene00016511
WBGene00016596
WBGene00016667
WBGene00016674
WBGene00016773
WBGene00016845
WBGene00016891
WBGene00016894
WBGene00016953
WBGene00017082
WBGene00017218
WBGene00017291
WBGene00017301
WBGene00017305
WBGene00017430
WBGene00017466
WBGene00017569
WBGene00017583
WBGene00017660
WBGene00017726
WBGene00017754
WBGene00018031
WBGene00018055
WBGene00018062
WBGene00018235
WBGene00018353
WBGene00018383
WBGene00018470
WBGene00018538
WBGene00018616
WBGene00018646
WBGene00018730
WBGene00018731
WBGene00018786
WBGene00018854
WBGene00018937
WBGene00018971
WBGene00018980
WBGene00019090
WBGene00019105
WBGene00019113
WBGene00019184
WBGene00019250
WBGene00019311
WBGene00019388
WBGene00019404
WBGene00019489
WBGene00019515
WBGene00019717
WBGene00019730
WBGene00019738
WBGene00019763
WBGene00019859
WBGene00019908
WBGene00019960
WBGene00019963
WBGene00019967
WBGene00020017
WBGene00020100
WBGene00020160
WBGene00020421
WBGene00020478
WBGene00020486
WBGene00020561
WBGene00020579
WBGene00020616
WBGene00020618
WBGene00020670
WBGene00020774
WBGene00020873
WBGene00020972
WBGene00021050
WBGene00021083
WBGene00021084
WBGene00021085
WBGene00021087
WBGene00021124
WBGene00021544
WBGene00021625
WBGene00021629
WBGene00021645
WBGene00021928
WBGene00022313
WBGene00022383
WBGene00022674
WBGene00022725
WBGene00022743
WBGene00022782
WBGene00022817
WBGene00023503
WBGene00044011
WBGene00044019
WBGene00044107
WBGene00044175
WBGene00044206
WBGene00044393
WBGene00044443
WBGene00044512
WBGene00044644
WBGene00044646
WBGene00045391
WBGene00045416
WBGene00045457
WBGene00077691
WBGene00184956
WBGene00194713
WBGene00219376

## Sheet: set26down
down-regulated gene in set-26 mutant from RNA-seq
WBGene00000039
WBGene00000109
WBGene00000178
WBGene00000183
WBGene00000220
WBGene00000229
WBGene00000230
WBGene00000251
WBGene00000252
WBGene00000256
WBGene00000490
WBGene00000493
WBGene00000557
WBGene00000596
WBGene00000597
WBGene00000608
WBGene00000609
WBGene00000615
WBGene00000623
WBGene00000624
WBGene00000625
WBGene00000626
WBGene00000636
WBGene00000638
WBGene00000639
WBGene00000647
WBGene00000655
WBGene00000657
WBGene00000670
WBGene00000671
WBGene00000672
WBGene00000675
WBGene00000678
WBGene00000680
WBGene00000683
WBGene00000684
WBGene00000693
WBGene00000696
WBGene00000698
WBGene00000702
WBGene00000703
WBGene00000708
WBGene00000711
WBGene00000712
WBGene00000713
WBGene00000716
WBGene00000722
WBGene00000725
WBGene00000726
WBGene00000748
WBGene00000751
WBGene00000752
WBGene00000754
WBGene00000757
WBGene00000781
WBGene00000786
WBGene00000869
WBGene00000882
WBGene00000896
WBGene00000902
WBGene00000928
WBGene00000930
WBGene00000984
WBGene00001038
WBGene00001064
WBGene00001065
WBGene00001069
WBGene00001070
WBGene00001071
WBGene00001072
WBGene00001073
WBGene00001164
WBGene00001331
WBGene00001368
WBGene00001398
WBGene00001399
WBGene00001428
WBGene00001430
WBGene00001570
WBGene00001626
WBGene00001631
WBGene00001632
WBGene00001633
WBGene00001690
WBGene00001707
WBGene00001714
WBGene00001716
WBGene00001719
WBGene00001723
WBGene00001724
WBGene00001736
WBGene00002039
WBGene00002052
WBGene00002070
WBGene00002073
WBGene00002162
WBGene00002175
WBGene00002285
WBGene00002393
WBGene00003057
WBGene00003093
WBGene00003100
WBGene00003107
WBGene00003214
WBGene00003372
WBGene00003523
WBGene00003539
WBGene00003543
WBGene00003553
WBGene00003577
WBGene00003776
WBGene00003813
WBGene00003828
WBGene00003888
WBGene00003981
WBGene00004025
WBGene00004077
WBGene00004140
WBGene00004175
WBGene00004207
WBGene00004219
WBGene00004224
WBGene00004229
WBGene00004264
WBGene00004266
WBGene00004271
WBGene00004311
WBGene00004391
WBGene00004394
WBGene00004398
WBGene00004989
WBGene00004998
WBGene00005017
WBGene00005018
WBGene00006059
WBGene00006366
WBGene00006472
WBGene00006494
WBGene00006541
WBGene00006592
WBGene00006608
WBGene00006626
WBGene00006917
WBGene00006925
WBGene00006926
WBGene00006927
WBGene00006928
WBGene00006929
WBGene00006930
WBGene00006947
WBGene00006948
WBGene00006950
WBGene00006952
WBGene00006956
WBGene00007059
WBGene00007112
WBGene00007170
WBGene00007174
WBGene00007264
WBGene00007282
WBGene00007290
WBGene00007315
WBGene00007362
WBGene00007420
WBGene00007458
WBGene00007521
WBGene00007530
WBGene00007560
WBGene00007593
WBGene00007637
WBGene00007649
WBGene00007683
WBGene00007692
WBGene00007724
WBGene00007728
WBGene00007751
WBGene00007867
WBGene00007894
WBGene00007938
WBGene00007944
WBGene00008078
WBGene00008180
WBGene00008260
WBGene00008277
WBGene00008359
WBGene00008377
WBGene00008378
WBGene00008390
WBGene00008393
WBGene00008394
WBGene00008448
WBGene00008511
WBGene00008567
WBGene00008593
WBGene00008605
WBGene00008654
WBGene00008673
WBGene00008712
WBGene00008727
WBGene00008875
WBGene00008964
WBGene00008987
WBGene00009094
WBGene00009130
WBGene00009215
WBGene00009229
WBGene00009261
WBGene00009281
WBGene00009318
WBGene00009438
WBGene00009626
WBGene00009635
WBGene00009674
WBGene00009678
WBGene00009732
WBGene00009816
WBGene00009830
WBGene00009889
WBGene00009898
WBGene00009926
WBGene00010007
WBGene00010034
WBGene00010065
WBGene00010084
WBGene00010085
WBGene00010204
WBGene00010285
WBGene00010321
WBGene00010356
WBGene00010419
WBGene00010442
WBGene00010492
WBGene00010613
WBGene00010617
WBGene00010621
WBGene00010673
WBGene00010738
WBGene00010835
WBGene00010850
WBGene00010851
WBGene00010969
WBGene00010972
WBGene00011000
WBGene00011011
WBGene00011023
WBGene00011024
WBGene00011077
WBGene00011107
WBGene00011152
WBGene00011153
WBGene00011273
WBGene00011393
WBGene00011462
WBGene00011468
WBGene00011515
WBGene00011548
WBGene00011665
WBGene00011717
WBGene00011768
WBGene00011775
WBGene00011827
WBGene00011831
WBGene00011836
WBGene00011971
WBGene00012032
WBGene00012123
WBGene00012131
WBGene00012134
WBGene00012186
WBGene00012212
WBGene00012213
WBGene00012231
WBGene00012255
WBGene00012256
WBGene00012257
WBGene00012261
WBGene00012301
WBGene00012407
WBGene00012429
WBGene00012540
WBGene00012545
WBGene00012557
WBGene00012566
WBGene00012596
WBGene00012635
WBGene00012659
WBGene00012664
WBGene00012747
WBGene00012791
WBGene00012796
WBGene00012837
WBGene00012880
WBGene00012901
WBGene00012904
WBGene00012917
WBGene00013035
WBGene00013171
WBGene00013264
WBGene00013297
WBGene00013311
WBGene00013391
WBGene00013392
WBGene00013393
WBGene00013394
WBGene00013668
WBGene00013673
WBGene00013693
WBGene00013740
WBGene00013852
WBGene00013867
WBGene00013891
WBGene00013931
WBGene00014057
WBGene00014089
WBGene00014955
WBGene00015216
WBGene00015248
WBGene00015284
WBGene00015300
WBGene00015336
WBGene00015361
WBGene00015400
WBGene00015509
WBGene00015510
WBGene00015646
WBGene00015683
WBGene00015734
WBGene00015780
WBGene00015795
WBGene00016022
WBGene00016029
WBGene00016106
WBGene00016133
WBGene00016136
WBGene00016235
WBGene00016247
WBGene00016274
WBGene00016276
WBGene00016329
WBGene00016422
WBGene00016434
WBGene00016523
WBGene00016583
WBGene00016627
WBGene00016636
WBGene00016638
WBGene00016658
WBGene00016721
WBGene00016746
WBGene00016749
WBGene00016874
WBGene00016893
WBGene00016896
WBGene00017019
WBGene00017020
WBGene00017071
WBGene00017177
WBGene00017243
WBGene00017307
WBGene00017336
WBGene00017402
WBGene00017429
WBGene00017498
WBGene00017535
WBGene00017541
WBGene00017560
WBGene00017563
WBGene00017648
WBGene00017678
WBGene00017691
WBGene00017716
WBGene00017814
WBGene00017819
WBGene00017826
WBGene00017881
WBGene00017963
WBGene00017973
WBGene00017991
WBGene00017998
WBGene00018039
WBGene00018130
WBGene00018215
WBGene00018256
WBGene00018275
WBGene00018335
WBGene00018418
WBGene00018515
WBGene00018572
WBGene00018605
WBGene00018640
WBGene00018656
WBGene00018682
WBGene00018706
WBGene00018708
WBGene00018741
WBGene00018809
WBGene00018928
WBGene00018963
WBGene00018965
WBGene00019021
WBGene00019030
WBGene00019097
WBGene00019148
WBGene00019153
WBGene00019154
WBGene00019272
WBGene00019285
WBGene00019318
WBGene00019520
WBGene00019565
WBGene00019609
WBGene00019619
WBGene00019622
WBGene00019624
WBGene00019728
WBGene00019760
WBGene00019799
WBGene00019813
WBGene00019882
WBGene00019935
WBGene00020083
WBGene00020104
WBGene00020194
WBGene00020218
WBGene00020250
WBGene00020343
WBGene00020365
WBGene00020396
WBGene00020437
WBGene00020456
WBGene00020465
WBGene00020481
WBGene00020483
WBGene00020484
WBGene00020487
WBGene00020550
WBGene00020560
WBGene00020626
WBGene00020674
WBGene00020683
WBGene00020704
WBGene00020786
WBGene00020837
WBGene00020846
WBGene00020855
WBGene00020911
WBGene00021005
WBGene00021095
WBGene00021186
WBGene00021263
WBGene00021292
WBGene00021420
WBGene00021546
WBGene00021627
WBGene00021641
WBGene00021690
WBGene00021779
WBGene00021791
WBGene00021797
WBGene00021850
WBGene00021870
WBGene00021931
WBGene00022024
WBGene00022033
WBGene00022060
WBGene00022103
WBGene00022122
WBGene00022146
WBGene00022156
WBGene00022160
WBGene00022274
WBGene00022415
WBGene00022455
WBGene00022517
WBGene00022577
WBGene00022586
WBGene00022591
WBGene00022611
WBGene00022612
WBGene00022642
WBGene00022653
WBGene00022793
WBGene00022820
WBGene00022821
WBGene00022822
WBGene00022858
WBGene00022865
WBGene00023416
WBGene00023451
WBGene00044080
WBGene00044081
WBGene00044163
WBGene00044178
WBGene00044213
WBGene00044445
WBGene00044446
WBGene00044530
WBGene00044535
WBGene00044680
WBGene00044796
WBGene00044797
WBGene00044803
WBGene00045038
WBGene00045239
WBGene00045245
WBGene00045265
WBGene00045268
WBGene00045269
WBGene00045271
WBGene00045394
WBGene00045399
WBGene00045461
WBGene00050913
WBGene00050914
WBGene00077697
WBGene00194659
WBGene00194663
WBGene00194674
WBGene00194985
WBGene00196684
WBGene00197552
WBGene00197773
WBGene00198547
WBGene00198946
WBGene00200662
WBGene00206373
WBGene00219208
WBGene00219274
WBGene00220261
WBGene00235268
WBGene00255598

## Sheet: F1set9set26up
up-regulated gene in F1 set-9 set-26 double mutant from RNA-seq
WBGene00018026
WBGene00000024
WBGene00011999
WBGene00003075
WBGene00017073
WBGene00021084
WBGene00019578
WBGene00004098
WBGene00138719
WBGene00009720
WBGene00008602
WBGene00006650
WBGene00017743
WBGene00003525
WBGene00003520
WBGene00011535
WBGene00004139
WBGene00004099
WBGene00000033
WBGene00004146
WBGene00016662
WBGene00043981
WBGene00000031
WBGene00009086
WBGene00022467
WBGene00011103
WBGene00011757
WBGene00010987
WBGene00011979
WBGene00011010
WBGene00020017
WBGene00000030
WBGene00003601
WBGene00006546
WBGene00018172
WBGene00044803
WBGene00015180
WBGene00003879
WBGene00008967
WBGene00077691
WBGene00013865
WBGene00045164
WBGene00007538
WBGene00018713
WBGene00015153
WBGene00017587
WBGene00009963
WBGene00015682
WBGene00022242
WBGene00010765
WBGene00010403
WBGene00044011
WBGene00011536
WBGene00011537
WBGene00018443
WBGene00004156
WBGene00015546
WBGene00012863
WBGene00022508
WBGene00002090
WBGene00002086
WBGene00022417
WBGene00235279
WBGene00016457
WBGene00016915
WBGene00000029
WBGene00011342
WBGene00017835
WBGene00019795
WBGene00004354
WBGene00020597
WBGene00016153
WBGene00000034
WBGene00012299
WBGene00020270
WBGene00000027
WBGene00004141
WBGene00017872
WBGene00004750
WBGene00008844
WBGene00019901
WBGene00020803
WBGene00044338
WBGene00011295
WBGene00014811
WBGene00000301
WBGene00005085
WBGene00007869
WBGene00020771
WBGene00015457
WBGene00007598
WBGene00017754
WBGene00007450
WBGene00004174
WBGene00020080
WBGene00009226
WBGene00018176
WBGene00018292
WBGene00014039
WBGene00004992
WBGene00001736
WBGene00007154
WBGene00019756
WBGene00003533
WBGene00015465
WBGene00011388
WBGene00018225
WBGene00018619
WBGene00009398
WBGene00004103
WBGene00043066
WBGene00195377
WBGene00020421
WBGene00017424
WBGene00012942
WBGene00009155
WBGene00008314
WBGene00020014
WBGene00010468
WBGene00015624
WBGene00009071
WBGene00018484
WBGene00016731
WBGene00010831
WBGene00015103
WBGene00008449
WBGene00004118
WBGene00012301
WBGene00017843
WBGene00000893
WBGene00022747
WBGene00002125
WBGene00010509
WBGene00044521
WBGene00008559
WBGene00010467
WBGene00013846
WBGene00021085
WBGene00002107
WBGene00004008
WBGene00015899
WBGene00020599
WBGene00020670
WBGene00010830
WBGene00010555
WBGene00000646
WBGene00021083
WBGene00003545
WBGene00019772
WBGene00004153
WBGene00000025
WBGene00000663
WBGene00000932
WBGene00003763
WBGene00009573
WBGene00007687
WBGene00010760
WBGene00007325
WBGene00020766
WBGene00004017
WBGene00000610
WBGene00016732
WBGene00016242
WBGene00004104
WBGene00013130
WBGene00019799
WBGene00016130
WBGene00000521
WBGene00010319
WBGene00016824
WBGene00010057
WBGene00001444
WBGene00018300
WBGene00019839
WBGene00044683
WBGene00020386
WBGene00007344
WBGene00008347
WBGene00017247
WBGene00004352
WBGene00006552
WBGene00000558
WBGene00009834
WBGene00020893
WBGene00000729
WBGene00006505
WBGene00010464
WBGene00002983
WBGene00008536
WBGene00000725
WBGene00017263
WBGene00000641
WBGene00003456
WBGene00008203
WBGene00007243
WBGene00007251
WBGene00010051
WBGene00009864
WBGene00011524
WBGene00044016
WBGene00007868
WBGene00011011
WBGene00004233
WBGene00017413
WBGene00003534
WBGene00012405
WBGene00000694
WBGene00009087
WBGene00007773
WBGene00018616
WBGene00010493
WBGene00020646
WBGene00008825
WBGene00010573
WBGene00001700
WBGene00017218
WBGene00006589
WBGene00012199
WBGene00002128
WBGene00003548
WBGene00018203
WBGene00017937
WBGene00000636
WBGene00011313
WBGene00007935
WBGene00020702
WBGene00016273
WBGene00013539
WBGene00009301
WBGene00195004
WBGene00003532
WBGene00019989
WBGene00008047
WBGene00002348
WBGene00010895
WBGene00194663
WBGene00019734
WBGene00022287
WBGene00011642
WBGene00017532
WBGene00001695
WBGene00016485
WBGene00004123
WBGene00019601
WBGene00015032
WBGene00005644
WBGene00011175
WBGene00003514
WBGene00016733
WBGene00017376
WBGene00020338
WBGene00018630
WBGene00003527
WBGene00014173
WBGene00006583
WBGene00015544
WBGene00011152
WBGene00010692
WBGene00017305
WBGene00010968
WBGene00019721
WBGene00015622
WBGene00044446
WBGene00001109
WBGene00010492
WBGene00017944
WBGene00015660
WBGene00008789
WBGene00006555
WBGene00009222
WBGene00008376
WBGene00008807
WBGene00021791
WBGene00008180
WBGene00016533
WBGene00008824
WBGene00012436
WBGene00000689
WBGene00012757
WBGene00011505
WBGene00020413
WBGene00018031
WBGene00007246
WBGene00043534
WBGene00011434
WBGene00004973
WBGene00020652
WBGene00014241
WBGene00020704
WBGene00012120
WBGene00016410
WBGene00006778
WBGene00020672
WBGene00016898
WBGene00012549
WBGene00007300
WBGene00021779
WBGene00007149
WBGene00020497
WBGene00018283
WBGene00016823
WBGene00000666
WBGene00019409
WBGene00077757
WBGene00021627
WBGene00006038
WBGene00008186
WBGene00008535
WBGene00002124
WBGene00016486
WBGene00017761
WBGene00017538
WBGene00022018
WBGene00016781
WBGene00019929
WBGene00020595
WBGene00015340
WBGene00007060
WBGene00000710
WBGene00014048
WBGene00019459
WBGene00004157
WBGene00020313
WBGene00019260
WBGene00013960
WBGene00016229
WBGene00021171
WBGene00011185
WBGene00019064
WBGene00021730
WBGene00022669
WBGene00018640
WBGene00219800
WBGene00000735
WBGene00017666
WBGene00002246
WBGene00007290
WBGene00010917
WBGene00008022
WBGene00220117
WBGene00017270
WBGene00015948
WBGene00019568
WBGene00011741
WBGene00010000
WBGene00006644
WBGene00001858
WBGene00006044
WBGene00014097
WBGene00003784
WBGene00010184
WBGene00017451
WBGene00044042
WBGene00009637
WBGene00014077
WBGene00020977
WBGene00008093
WBGene00011880
WBGene00017009
WBGene00012814
WBGene00022008
WBGene00011286
WBGene00021625
WBGene00007985
WBGene00002208
WBGene00011683
WBGene00002089
WBGene00011572
WBGene00011870
WBGene00013851
WBGene00009383
WBGene00012224
WBGene00006539
WBGene00000645
WBGene00219570
WBGene00194670
WBGene00012498
WBGene00235354
WBGene00009034
WBGene00008210
WBGene00043952
WBGene00004155
WBGene00020590
WBGene00017052
WBGene00008658
WBGene00004798
WBGene00017471
WBGene00020035
WBGene00016106
WBGene00015990
WBGene00022679
WBGene00018859
WBGene00003544
WBGene00011869
WBGene00020237
WBGene00011063
WBGene00000397
WBGene00021358
WBGene00000388
WBGene00015035
WBGene00019160
WBGene00020465
WBGene00007262
WBGene00009835
WBGene00020370
WBGene00000903
WBGene00014117
WBGene00020550
WBGene00009300
WBGene00004241
WBGene00018792
WBGene00016196
WBGene00017986
WBGene00235341
WBGene00009239
WBGene00019569
WBGene00010262
WBGene00012679
WBGene00018500
WBGene00017142
WBGene00017402
WBGene00018965
WBGene00013902
WBGene00015046
WBGene00020192
WBGene00008170
WBGene00001713
WBGene00011227
WBGene00018065
WBGene00044272
WBGene00020039
WBGene00016178
WBGene00006619
WBGene00008485
WBGene00007222
WBGene00008822
WBGene00007250
WBGene00008537
WBGene00007709
WBGene00019811
WBGene00011805
WBGene00009384
WBGene00015496
WBGene00007517
WBGene00014904
WBGene00009149
WBGene00044358
WBGene00007633
WBGene00045060
WBGene00012191
WBGene00021690
WBGene00000465
WBGene00001569
WBGene00019189
WBGene00194643
WBGene00011183
WBGene00020948
WBGene00017550
WBGene00000021
WBGene00016713
WBGene00009701
WBGene00001606
WBGene00013476
WBGene00003981
WBGene00012946
WBGene00012020
WBGene00021605
WBGene00004078
WBGene00018899
WBGene00016596
WBGene00195068
WBGene00000866
WBGene00003865
WBGene00006394
WBGene00001591
WBGene00004115
WBGene00011284
WBGene00011297
WBGene00007551
WBGene00001456
WBGene00011789
WBGene00007249
WBGene00017584
WBGene00011811
WBGene00019905
WBGene00007573
WBGene00194985
WBGene00011378
WBGene00018498
WBGene00011070
WBGene00021641
WBGene00021087
WBGene00008850
WBGene00002113
WBGene00015083
WBGene00018937
WBGene00021124
WBGene00008207
WBGene00018178
WBGene00010948
WBGene00008950
WBGene00185095
WBGene00016773
WBGene00011491
WBGene00219286
WBGene00009651
WBGene00219376
WBGene00004173
WBGene00021030
WBGene00006979
WBGene00011132
WBGene00000496
WBGene00009896
WBGene00011431
WBGene00009115
WBGene00011689
WBGene00019939
WBGene00020910
WBGene00006870
WBGene00010354
WBGene00019833
WBGene00008959
WBGene00008464
WBGene00019920
WBGene00018027
WBGene00021853
WBGene00008652
WBGene00015165
WBGene00044347
WBGene00008801
WBGene00018502
WBGene00009186
WBGene00017555
WBGene00011153
WBGene00004239
WBGene00006586
WBGene00004374
WBGene00017177
WBGene00011336
WBGene00022383
WBGene00000867
WBGene00015312
WBGene00011191
WBGene00020991
WBGene00009280
WBGene00001703
WBGene00022834
WBGene00019606
WBGene00022228
WBGene00003228
WBGene00017213
WBGene00003395
WBGene00009638
WBGene00002018
WBGene00235305
WBGene00003219
WBGene00000455
WBGene00045162
WBGene00009956
WBGene00001772
WBGene00007804
WBGene00003437
WBGene00015929
WBGene00018999
WBGene00012672
WBGene00013854
WBGene00018841
WBGene00001607
WBGene00008823
WBGene00018227
WBGene00008529
WBGene00003562
WBGene00023427
WBGene00004119
WBGene00002088
WBGene00007553
WBGene00011928
WBGene00017548
WBGene00010365
WBGene00009662
WBGene00019290
WBGene00017352
WBGene00013651
WBGene00000734
WBGene00022254
WBGene00003231
WBGene00020033
WBGene00007544
WBGene00016163
WBGene00022541
WBGene00164969
WBGene00013515
WBGene00021978
WBGene00009035
WBGene00219912
WBGene00021035
WBGene00011834
WBGene00021446
WBGene00017808
WBGene00008298
WBGene00014801
WBGene00015136
WBGene00015467
WBGene00021678
WBGene00021200
WBGene00008383
WBGene00007643
WBGene00011320
WBGene00017554
WBGene00012102
WBGene00015102
WBGene00000747
WBGene00015796
WBGene00003864
WBGene00007225
WBGene00020684
WBGene00022876
WBGene00194892
WBGene00011425
WBGene00010355
WBGene00008074
WBGene00014168
WBGene00015855
WBGene00000780
WBGene00007797
WBGene00017461
WBGene00022257
WBGene00010081
WBGene00009458
WBGene00001905
WBGene00009865
WBGene00017134
WBGene00022505
WBGene00007177
WBGene00164968
WBGene00007584
WBGene00001906
WBGene00013058
WBGene00003783
WBGene00010036
WBGene00007381
WBGene00004243
WBGene00015049
WBGene00011501
WBGene00010661
WBGene00010581
WBGene00004052
WBGene00013331
WBGene00011691
WBGene00013299
WBGene00020777
WBGene00001647
WBGene00021763
WBGene00045306
WBGene00012609
WBGene00022586
WBGene00045391
WBGene00011489
WBGene00007305
WBGene00021795
WBGene00011788
WBGene00009606
WBGene00000190
WBGene00010698
WBGene00008235
WBGene00009097
WBGene00011986
WBGene00011898
WBGene00008590
WBGene00008028
WBGene00219374
WBGene00013586
WBGene00015006
WBGene00003230
WBGene00012302
WBGene00019858
WBGene00009656
WBGene00016146
WBGene00009964
WBGene00019341
WBGene00020858
WBGene00022292
WBGene00019563
WBGene00015851
WBGene00077732
WBGene00020995
WBGene00004114
WBGene00013249
WBGene00000497
WBGene00000168
WBGene00012637
WBGene00004027
WBGene00019461
WBGene00000704
WBGene00021056
WBGene00007332
WBGene00016414
WBGene00018505
WBGene00007938
WBGene00011173
WBGene00002011
WBGene00015218
WBGene00016701
WBGene00016501
WBGene00018808
WBGene00022789
WBGene00018742
WBGene00004084
WBGene00015677
WBGene00011895
WBGene00008659
WBGene00000474
WBGene00021153
WBGene00003229
WBGene00011350
WBGene00011012
WBGene00009502
WBGene00016752
WBGene00016022
WBGene00020074
WBGene00017978
WBGene00018948
WBGene00010194
WBGene00014158
WBGene00011172
WBGene00013849
WBGene00018547
WBGene00002992
WBGene00002136
WBGene00016388
WBGene00013381
WBGene00000727
WBGene00008313
WBGene00010474
WBGene00013965
WBGene00007334
WBGene00020678
WBGene00007763
WBGene00012547
WBGene00021908
WBGene00016956
WBGene00009938
WBGene00012401
WBGene00010147
WBGene00015620
WBGene00010353
WBGene00013349
WBGene00023355
WBGene00006058
WBGene00007903
WBGene00021186
WBGene00004242
WBGene00021664
WBGene00000562
WBGene00016053
WBGene00018991
WBGene00018010
WBGene00022385
WBGene00016586
WBGene00004976
WBGene00020290
WBGene00020571
WBGene00017246
WBGene00019538
WBGene00004903
WBGene00010348
WBGene00021596
WBGene00003184
WBGene00016667
WBGene00011112
WBGene00017354
WBGene00012716
WBGene00013165
WBGene00016339
WBGene00001482
WBGene00016152
WBGene00000681
WBGene00004231
WBGene00007823
WBGene00012435
WBGene00013318
WBGene00007688
WBGene00016402
WBGene00011945
WBGene00004984
WBGene00003756
WBGene00255714
WBGene00001725
WBGene00007080
WBGene00022891
WBGene00016291
WBGene00011133
WBGene00015997
WBGene00022133
WBGene00009160
WBGene00006311
WBGene00020860
WBGene00007335
WBGene00013987
WBGene00013567
WBGene00017696
WBGene00013429
WBGene00005012
WBGene00194703
WBGene00022753
WBGene00017869
WBGene00022060
WBGene00017430
WBGene00014516
WBGene00013999
WBGene00002109
WBGene00013474
WBGene00000473
WBGene00020987
WBGene00020091
WBGene00009501
WBGene00015688
WBGene00007124
WBGene00014121
WBGene00021236
WBGene00008001
WBGene00017950
WBGene00004246
WBGene00007445
WBGene00013192
WBGene00019132
WBGene00000730
WBGene00013304
WBGene00018163
WBGene00013611
WBGene00004002
WBGene00013526
WBGene00021207
WBGene00007190
WBGene00012012
WBGene00001599
WBGene00016566
WBGene00020040
WBGene00219908
WBGene00001059
WBGene00013809
WBGene00012431
WBGene00015134
WBGene00003465
WBGene00004163
WBGene00018698
WBGene00007457
WBGene00008841
WBGene00003024
WBGene00000653
WBGene00007580
WBGene00017985
WBGene00086551
WBGene00012219
WBGene00015994
WBGene00021969
WBGene00016680
WBGene00002368
WBGene00021755
WBGene00009513
WBGene00003425
WBGene00010351
WBGene00219949
WBGene00018118
WBGene00016263
WBGene00009016
WBGene00007649
WBGene00013684
WBGene00010366
WBGene00018301
WBGene00194852
WBGene00020659
WBGene00185002
WBGene00004972
WBGene00015572
WBGene00016930
WBGene00001683
WBGene00011129
WBGene00016826
WBGene00007744
WBGene00009640
WBGene00013069
WBGene00020032
WBGene00006060
WBGene00009978
WBGene00009302
WBGene00001597
WBGene00021887
WBGene00014987
WBGene00003837
WBGene00002144
WBGene00021398
WBGene00003554
WBGene00021968
WBGene00006618
WBGene00018994
WBGene00009581
WBGene00011988
WBGene00255426
WBGene00018645
WBGene00001164
WBGene00045456
WBGene00044339
WBGene00009883
WBGene00014157
WBGene00015073
WBGene00003096
WBGene00010265
WBGene00016839
WBGene00012585
WBGene00017426
WBGene00016413
WBGene00010549
WBGene00016822
WBGene00015516
WBGene00007508
WBGene00013380
WBGene00000460
WBGene00019561
WBGene00021781
WBGene00015747
WBGene00011203
WBGene00010634
WBGene00021386
WBGene00021787
WBGene00009075
WBGene00007788
WBGene00000920
WBGene00007159
WBGene00009592
WBGene00015169
WBGene00001985
WBGene00000728
WBGene00022203
WBGene00012210
WBGene00018706
WBGene00009708
WBGene00018268
WBGene00017438
WBGene00006040
WBGene00004380
WBGene00009982
WBGene00020419
WBGene00001460
WBGene00018538
WBGene00019608
WBGene00008230
WBGene00006047
WBGene00010786
WBGene00015843
WBGene00013610
WBGene00016698
WBGene00019184
WBGene00019255
WBGene00002225
WBGene00044261
WBGene00044015
WBGene00020087
WBGene00017673
WBGene00019912
WBGene00022707
WBGene00007171
WBGene00020551
WBGene00001571
WBGene00009605
WBGene00016516
WBGene00018111
WBGene00012220
WBGene00003606
WBGene00012307
WBGene00016181
WBGene00021658
WBGene00012926
WBGene00008802
WBGene00004300
WBGene00015819
WBGene00008218
WBGene00010738
WBGene00045245
WBGene00044260
WBGene00008312
WBGene00004971
WBGene00014813
WBGene00008332
WBGene00016399
WBGene00016806
WBGene00016894
WBGene00017636
WBGene00023451
WBGene00003067
WBGene00018833
WBGene00009659
WBGene00022590
WBGene00012979
WBGene00011376
WBGene00011262
WBGene00008495
WBGene00016440
WBGene00022288
WBGene00015917
WBGene00004370
WBGene00015908
WBGene00019512
WBGene00017724
WBGene00010574
WBGene00001110
WBGene00015931
WBGene00011886
WBGene00003424
WBGene00000868
WBGene00013858
WBGene00015692
WBGene00015970
WBGene00019530
WBGene00011258
WBGene00007306
WBGene00013148
WBGene00017460
WBGene00015765
WBGene00021213
WBGene00020896
WBGene00010367
WBGene00019357
WBGene00003429
WBGene00010195
WBGene00016896
WBGene00016953
WBGene00000665
WBGene00020914
WBGene00007601
WBGene00002212
WBGene00044911
WBGene00010466
WBGene00015348
WBGene00015055
WBGene00011918
WBGene00016312
WBGene00005013
WBGene00016322
WBGene00020966
WBGene00020117
WBGene00016010
WBGene00004962
WBGene00018472
WBGene00016980
WBGene00006886
WBGene00020990
WBGene00004909
WBGene00009215
WBGene00001044
WBGene00007087
WBGene00021541
WBGene00007320
WBGene00015842
WBGene00012905
WBGene00021206
WBGene00021010
WBGene00008125
WBGene00010876
WBGene00018303
WBGene00004100
WBGene00044538
WBGene00020984
WBGene00000878
WBGene00013437
WBGene00001462
WBGene00016180
WBGene00013887
WBGene00015937
WBGene00011171
WBGene00008385
WBGene00015505
WBGene00007285
WBGene00010281
WBGene00015689
WBGene00012879
WBGene00018659
WBGene00019894
WBGene00020661
WBGene00007277
WBGene00007448
WBGene00012785
WBGene00001998
WBGene00004023
WBGene00011466
WBGene00000974
WBGene00020218
WBGene00001410
WBGene00007278
WBGene00012937
WBGene00009377
WBGene00007398
WBGene00020862
WBGene00004908
WBGene00017802
WBGene00007337
WBGene00002221
WBGene00009470
WBGene00021214
WBGene00011493
WBGene00008387
WBGene00010690
WBGene00000023
WBGene00019712
WBGene00008561
WBGene00010608
WBGene00000417
WBGene00011176
WBGene00020010
WBGene00013443
WBGene00018483
WBGene00006591
WBGene00013785
WBGene00020954
WBGene00019015
WBGene00018631
WBGene00014954
WBGene00003526
WBGene00001839
WBGene00043147
WBGene00011081
WBGene00008649
WBGene00007209
WBGene00008356
WBGene00006048
WBGene00016040
WBGene00004985
WBGene00000373
WBGene00012747
WBGene00018528
WBGene00006050
WBGene00011795
WBGene00018215
WBGene00010181
WBGene00004823
WBGene00011513
WBGene00011214
WBGene00008272
WBGene00009449
WBGene00021639
WBGene00019600
WBGene00012207
WBGene00014082
WBGene00003444
WBGene00015097
WBGene00044005
WBGene00018895
WBGene00001487
WBGene00012231
WBGene00008854
WBGene00007640
WBGene00044067
WBGene00018134
WBGene00008677
WBGene00018336
WBGene00014247
WBGene00017853
WBGene00219849
WBGene00010041
WBGene00020461
WBGene00016954
WBGene00050940
WBGene00019605
WBGene00013556
WBGene00017452
WBGene00011793
WBGene00020103
WBGene00022110
WBGene00019792
WBGene00011478
WBGene00013552
WBGene00000544
WBGene00020072
WBGene00012901
WBGene00019381
WBGene00003432
WBGene00018016
WBGene00018806
WBGene00002226
WBGene00012294
WBGene00013879
WBGene00000797
WBGene00002072
WBGene00007817
WBGene00006449
WBGene00006404
WBGene00001686
WBGene00010486
WBGene00009959
WBGene00015766
WBGene00008145
WBGene00021650
WBGene00012565
WBGene00002131
WBGene00011600
WBGene00016421
WBGene00220238
WBGene00003469
WBGene00001595
WBGene00012595
WBGene00015627
WBGene00018668
WBGene00012296
WBGene00010781
WBGene00002033
WBGene00012924
WBGene00007977
WBGene00022854
WBGene00009182
WBGene00011612
WBGene00015992
WBGene00015907
WBGene00022162
WBGene00020588
WBGene00012481
WBGene00017922
WBGene00020223
WBGene00007230
WBGene00010046
WBGene00012627
WBGene00011062
WBGene00019169
WBGene00006553
WBGene00044174
WBGene00015698
WBGene00019086
WBGene00017647
WBGene00019165
WBGene00018497
WBGene00008233
WBGene00010719
WBGene00009203
WBGene00021114
WBGene00022754
WBGene00007196
WBGene00018926
WBGene00017801
WBGene00006976
WBGene00007597
WBGene00018575
WBGene00019556
WBGene00021155
WBGene00000913
WBGene00022036
WBGene00019723
WBGene00020116
WBGene00018196
WBGene00009897
WBGene00007301
WBGene00022888
WBGene00008871
WBGene00016742
WBGene00020713
WBGene00013208
WBGene00045509
WBGene00013700
WBGene00008080
WBGene00018127
WBGene00009884
WBGene00008724
WBGene00000592
WBGene00007624
WBGene00008417
WBGene00007516
WBGene00016351
WBGene00015590
WBGene00045355
WBGene00011746
WBGene00012115
WBGene00009948
WBGene00017851
WBGene00021750
WBGene00012095
WBGene00022452
WBGene00018580
WBGene00017031
WBGene00016638
WBGene00018158
WBGene00000799
WBGene00017026
WBGene00010091
WBGene00010246
WBGene00022085
WBGene00000250
WBGene00022157
WBGene00020350
WBGene00044109
WBGene00235293
WBGene00017672
WBGene00020627
WBGene00012104
WBGene00010048
WBGene00015857
WBGene00003457
WBGene00006051
WBGene00012855
WBGene00001603
WBGene00019337
WBGene00009681
WBGene00022034
WBGene00016447
WBGene00017841
WBGene00014125
WBGene00001973
WBGene00008139
WBGene00001941
WBGene00000019
WBGene00020404
WBGene00015756
WBGene00014238
WBGene00007543
WBGene00009588
WBGene00014154
WBGene00010241
WBGene00021832
WBGene00007777
WBGene00004234
WBGene00016353
WBGene00021381
WBGene00015089
WBGene00007308
WBGene00019410
WBGene00006053
WBGene00014116
WBGene00017175
WBGene00009090
WBGene00020841
WBGene00019254
WBGene00003431
WBGene00015051
WBGene00013038
WBGene00015306
WBGene00012535
WBGene00019002
WBGene00004960
WBGene00015818
WBGene00013138
WBGene00012700
WBGene00013214
WBGene00010114
WBGene00011114
WBGene00020084
WBGene00009685
WBGene00019430
WBGene00000865
WBGene00009129
WBGene00022743
WBGene00022108
WBGene00020070
WBGene00012689
WBGene00194700
WBGene00007307
WBGene00017931
WBGene00011278
WBGene00008061
WBGene00018605
WBGene00019564
WBGene00194935
WBGene00009404
WBGene00003835
WBGene00012845
WBGene00002228
WBGene00007248
WBGene00022532
WBGene00011597
WBGene00009753
WBGene00019087
WBGene00008780
WBGene00020353
WBGene00020414
WBGene00014006
WBGene00011460
WBGene00018511
WBGene00016512
WBGene00012109
WBGene00009270
WBGene00012781
WBGene00010155
WBGene00009031
WBGene00011560
WBGene00010611
WBGene00004044
WBGene00023490
WBGene00023424
WBGene00016541
WBGene00017114
WBGene00018001
WBGene00012169
WBGene00010900
WBGene00003497
WBGene00018347
WBGene00016083
WBGene00185086
WBGene00022462
WBGene00022849
WBGene00020219
WBGene00015820
WBGene00011919
WBGene00009937
WBGene00012684
WBGene00013290
WBGene00009321
WBGene00018930
WBGene00017384
WBGene00014857
WBGene00015024
WBGene00008005
WBGene00015095
WBGene00014240
WBGene00003443
WBGene00016381
WBGene00021858
WBGene00012638
WBGene00008968
WBGene00022708
WBGene00007092
WBGene00006940
WBGene00000503
WBGene00016799
WBGene00021007
WBGene00015029
WBGene00013862
WBGene00001872
WBGene00021012
WBGene00008661
WBGene00044777
WBGene00021878
WBGene00013956
WBGene00008811
WBGene00013894
WBGene00017553
WBGene00001855
WBGene00020819
WBGene00007778
WBGene00019152
WBGene00013713
WBGene00018563
WBGene00003442
WBGene00012786
WBGene00045357
WBGene00016612
WBGene00044204
WBGene00014229
WBGene00012138
WBGene00007610
WBGene00009313
WBGene00194949
WBGene00015852
WBGene00009344
WBGene00008137
WBGene00007757
WBGene00016277
WBGene00019997
WBGene00021465
WBGene00015591
WBGene00012276
WBGene00010072
WBGene00017648
WBGene00003467
WBGene00003912
WBGene00019501
WBGene00013419
WBGene00010920
WBGene00009193
WBGene00008651
WBGene00009471
WBGene00012795
WBGene00019949
WBGene00008172
WBGene00017559
WBGene00017774
WBGene00016161
WBGene00010787
WBGene00006977
WBGene00011601
WBGene00015557
WBGene00007541
WBGene00011061
WBGene00022775
WBGene00018037
WBGene00003992
WBGene00010612
WBGene00012087
WBGene00000772
WBGene00011401
WBGene00015912
WBGene00008063
WBGene00013033
WBGene00013553
WBGene00003434
WBGene00014148
WBGene00000935
WBGene00011464
WBGene00009113
WBGene00009457
WBGene00009308
WBGene00013540
WBGene00001600
WBGene00009028
WBGene00000664
WBGene00001609
WBGene00044674
WBGene00012784
WBGene00012809
WBGene00017827
WBGene00016382
WBGene00077519
WBGene00013853
WBGene00011968
WBGene00235297
WBGene00016358
WBGene00007987
WBGene00004043
WBGene00003994
WBGene00020905
WBGene00018773
WBGene00022621
WBGene00045247
WBGene00005006
WBGene00010651
WBGene00012715
WBGene00014955
WBGene00013473
WBGene00020105
WBGene00017842
WBGene00043056
WBGene00004244
WBGene00044258
WBGene00012357
WBGene00044684
WBGene00021993
WBGene00014100
WBGene00008710
WBGene00010663
WBGene00001914
WBGene00015026
WBGene00013654
WBGene00017279
WBGene00013696
WBGene00004333
WBGene00017955
WBGene00010542
WBGene00021560
WBGene00044388
WBGene00008440
WBGene00018950
WBGene00002297
WBGene00007578
WBGene00010289
WBGene00007733
WBGene00014104
WBGene00020715
WBGene00017542
WBGene00014179
WBGene00021555
WBGene00015745
WBGene00045434
WBGene00004904
WBGene00012527
WBGene00017975
WBGene00000386
WBGene00010136
WBGene00013303
WBGene00016707
WBGene00000601
WBGene00000718
WBGene00044209
WBGene00019431
WBGene00021113
WBGene00022172
WBGene00044081
WBGene00009459
WBGene00006056
WBGene00007948
WBGene00015002
WBGene00021579
WBGene00013520
WBGene00001937
WBGene00018862
WBGene00255375
WBGene00016356
WBGene00010061
WBGene00020840
WBGene00013224
WBGene00006980
WBGene00011235
WBGene00016461
WBGene00003470
WBGene00010291
WBGene00011066
WBGene00011910
WBGene00011777
WBGene00011911
WBGene00010065
WBGene00020707
WBGene00008346
WBGene00002016
WBGene00009983
WBGene00011324
WBGene00016360
WBGene00001514
WBGene00010633
WBGene00018297
WBGene00011748
WBGene00019628
WBGene00019406
WBGene00008577
WBGene00011352
WBGene00003183
WBGene00017112
WBGene00004028
WBGene00003435
WBGene00015853
WBGene00002186
WBGene00021419
WBGene00018548
WBGene00012592
WBGene00004969
WBGene00006374
WBGene00020349
WBGene00021720
WBGene00018487
WBGene00016788
WBGene00022718
WBGene00012315
WBGene00012827
WBGene00009374
WBGene00010980
WBGene00013193
WBGene00010363
WBGene00014665
WBGene00003421
WBGene00019487
WBGene00009641
WBGene00019692
WBGene00014183
WBGene00009272
WBGene00000546
WBGene00020411
WBGene00009682
WBGene00016357
WBGene00018902
WBGene00019489
WBGene00003463
WBGene00001912
WBGene00011400
WBGene00010254
WBGene00015780
WBGene00001413
WBGene00013137
WBGene00021344
WBGene00016182
WBGene00019026
WBGene00020282
WBGene00001836
WBGene00016156
WBGene00002214
WBGene00023407
WBGene00008197
WBGene00020187
WBGene00008741
WBGene00013771
WBGene00004237
WBGene00008394
WBGene00010583
WBGene00008399
WBGene00006390
WBGene00007180
WBGene00016084
WBGene00017269
WBGene00010679
WBGene00017397
WBGene00008541
WBGene00022858
WBGene00008173
WBGene00012831
WBGene00016392
WBGene00001601
WBGene00008684
WBGene00001942
WBGene00022830
WBGene00021676
WBGene00003449
WBGene00016636
WBGene00009532
WBGene00016054
WBGene00003438
WBGene00008219
WBGene00010563
WBGene00010409
WBGene00009173
WBGene00001829
WBGene00010263
WBGene00014113
WBGene00016462
WBGene00018314
WBGene00022751
WBGene00020757
WBGene00006377
WBGene00009221
WBGene00007785
WBGene00000723
WBGene00015310
WBGene00013431
WBGene00014197
WBGene00022296
WBGene00014169
WBGene00013442
WBGene00012113
WBGene00011951
WBGene00020412
WBGene00018721
WBGene00000499
WBGene00016236
WBGene00022673
WBGene00010485
WBGene00016416
WBGene00020806
WBGene00022399
WBGene00003452
WBGene00007270
WBGene00007791
WBGene00017485
WBGene00007710
WBGene00013241
WBGene00019030
WBGene00001214
WBGene00004178
WBGene00004394
WBGene00020463
WBGene00007458
WBGene00017659
WBGene00007109
WBGene00019247
WBGene00013723
WBGene00022244
WBGene00007966
WBGene00020168
WBGene00001862
WBGene00013857
WBGene00000626
WBGene00016825
WBGene00012794
WBGene00004952
WBGene00010053
WBGene00002068
WBGene00022079
WBGene00006463
WBGene00000770
WBGene00044205
WBGene00206459
WBGene00022090
WBGene00016449
WBGene00004086
WBGene00000863
WBGene00001831
WBGene00001023
WBGene00008648
WBGene00012551
WBGene00014667
WBGene00001922
WBGene00015504
WBGene00009385
WBGene00012530
WBGene00001856
WBGene00006052
WBGene00016947
WBGene00044080
WBGene00013270
WBGene00004965
WBGene00002061
WBGene00019429
WBGene00006375
WBGene00003887
WBGene00006720
WBGene00011908
WBGene00015642
WBGene00011225
WBGene00010731
WBGene00012428
WBGene00021014
WBGene00016632
WBGene00021038
WBGene00002034
WBGene00011449
WBGene00015463
WBGene00001598
WBGene00013538
WBGene00000804
WBGene00001830
WBGene00000699
WBGene00001016
WBGene00006804
WBGene00003026
WBGene00008991
WBGene00004422
WBGene00000517
WBGene00006795
WBGene00009163
WBGene00001401
WBGene00000634
WBGene00001511
WBGene00021996
WBGene00003464
WBGene00016409
WBGene00003037
WBGene00004094
WBGene00015011
WBGene00018585
WBGene00010056
WBGene00016955
WBGene00000138
WBGene00010910
WBGene00020375
WBGene00012524
WBGene00010814
WBGene00006974
WBGene00000602
WBGene00000711
WBGene00009262
WBGene00006944
WBGene00013729
WBGene00016796
WBGene00019236
WBGene00015975
WBGene00001678
WBGene00015817
WBGene00006793
WBGene00014250
WBGene00022706
WBGene00004808
WBGene00021192
WBGene00000099
WBGene00011044
WBGene00004132
WBGene00000871
WBGene00020558
WBGene00018900
WBGene00000603
WBGene00011636
WBGene00018416
WBGene00021876
WBGene00018137
WBGene00018613
WBGene00021191
WBGene00011282
WBGene00006039
WBGene00014124
WBGene00009006
WBGene00001102
WBGene00015976
WBGene00010007
WBGene00001919
WBGene00004179
WBGene00019771
WBGene00001977
WBGene00016045
WBGene00022278
WBGene00010080
WBGene00000707
WBGene00022680
WBGene00007168
WBGene00003209
WBGene00006483
WBGene00000875
WBGene00000227
WBGene00004049
WBGene00002251
WBGene00005019
WBGene00013223
WBGene00006868
WBGene00202343
WBGene00012802
WBGene00001832
WBGene00044638
WBGene00006406
WBGene00000479
WBGene00000672
WBGene00012117
WBGene00019118
WBGene00009553
WBGene00000639
WBGene00004337
WBGene00001938
WBGene00001933
WBGene00001921
WBGene00012484
WBGene00001936

## Sheet: F1set9set26down
down-regulated gene in F1 set-9 set-26 double mutant from RNA-seq
WBGene00009394
WBGene00013311
WBGene00001149
WBGene00022793
WBGene00003515
WBGene00006434
WBGene00009812
WBGene00006910
WBGene00022089
WBGene00023159
WBGene00010780
WBGene00017925
WBGene00000181
WBGene00016004
WBGene00017772
WBGene00018522
WBGene00001604
WBGene00012803
WBGene00019207
WBGene00022033
WBGene00001851
WBGene00008547
WBGene00011015
WBGene00017565
WBGene00008549
WBGene00009187
WBGene00016995
WBGene00019727
WBGene00010959
WBGene00018963
WBGene00010419
WBGene00003482
WBGene00009882
WBGene00013238
WBGene00022664
WBGene00006760
WBGene00006796
WBGene00020216
WBGene00006439
WBGene00000109
WBGene00017302
WBGene00013025
WBGene00010965
WBGene00002021
WBGene00002187
WBGene00000115
WBGene00015509
WBGene00000251
WBGene00003978
WBGene00009334
WBGene00012608
WBGene00022336
WBGene00015512
WBGene00003964
WBGene00018532
WBGene00022413
WBGene00004121
WBGene00015344
WBGene00019211
WBGene00007055
WBGene00044784
WBGene00008913
WBGene00012860
WBGene00007261
WBGene00011480
WBGene00001815
WBGene00022103
WBGene00000105
WBGene00008506
WBGene00011273
WBGene00006472
WBGene00012917
WBGene00018350
WBGene00020128
WBGene00002007
WBGene00000277
WBGene00019738
WBGene00019205
WBGene00013227
WBGene00009161
WBGene00008262
WBGene00011122
WBGene00021503
WBGene00004036
WBGene00006584
WBGene00022497
WBGene00011971
WBGene00019572
WBGene00010471
WBGene00001155
WBGene00010813
WBGene00000482
WBGene00007593
WBGene00003773
WBGene00001684
WBGene00015391
WBGene00017716
WBGene00004270
WBGene00017926
WBGene00003566
WBGene00002038
WBGene00020846
WBGene00010150
WBGene00002025
WBGene00219838
WBGene00016867
WBGene00017419
WBGene00000414
WBGene00017429
WBGene00015332
WBGene00015644
WBGene00007350
WBGene00010660
WBGene00008749
WBGene00016763
WBGene00007560
WBGene00006494
WBGene00000245
WBGene00006887
WBGene00018731
WBGene00018145
WBGene00006831
WBGene00011830
WBGene00010130
WBGene00002037
WBGene00017374
WBGene00014669
WBGene00021647
WBGene00020366
WBGene00004735
WBGene00015676
WBGene00017169
WBGene00021931
WBGene00017613
WBGene00001169
WBGene00017448
WBGene00019656
WBGene00013077
WBGene00000266
WBGene00019188
WBGene00015514
WBGene00000229
WBGene00020511
WBGene00015122
WBGene00006580
WBGene00009653
WBGene00010285
WBGene00012343
WBGene00000783
WBGene00021984
WBGene00022515
WBGene00015248
WBGene00002173
WBGene00016018
WBGene00004747
WBGene00007993
WBGene00010744
WBGene00014091
WBGene00008605
WBGene00007942
WBGene00020426
WBGene00003687
WBGene00008258
WBGene00000238
WBGene00016011
WBGene00015050
WBGene00006476
WBGene00007549
WBGene00001480
WBGene00011564
WBGene00008669
WBGene00019068
WBGene00019298
WBGene00022781
WBGene00004789
WBGene00010988
WBGene00020397
WBGene00012529
WBGene00017166
WBGene00002054
WBGene00001086
WBGene00001331
WBGene00001898
WBGene00016962
WBGene00000081
WBGene00009723
WBGene00044623
WBGene00020158
WBGene00004259
WBGene00020393
WBGene00006913
WBGene00013135
WBGene00000739
WBGene00001079
WBGene00011738
WBGene00019882
WBGene00003659
WBGene00010960
WBGene00004350
WBGene00014001
WBGene00015168
WBGene00001776
WBGene00003844
WBGene00019965
WBGene00010345
WBGene00007007
WBGene00006911
WBGene00006634
WBGene00018656
WBGene00017163
WBGene00000393
WBGene00007811
WBGene00000829
WBGene00010070
WBGene00012989
WBGene00003888
WBGene00013078
WBGene00013458
WBGene00000996
WBGene00010453
WBGene00019673
WBGene00009632
WBGene00015216
WBGene00007129
WBGene00021320
WBGene00013042
WBGene00002058
WBGene00006438
WBGene00000802
WBGene00018928
WBGene00004858
WBGene00016756
WBGene00001091
WBGene00002044
WBGene00001396
WBGene00004438
WBGene00001794
WBGene00012352
WBGene00008194
WBGene00017771
WBGene00000557
WBGene00018878
WBGene00009342
WBGene00003980
WBGene00020115
WBGene00016258
WBGene00011977
WBGene00015177
WBGene00017201
WBGene00003628
WBGene00015131
WBGene00019955
WBGene00009433
WBGene00021952
WBGene00004358
WBGene00014153
WBGene00016379
WBGene00004057
WBGene00006970
WBGene00003963
WBGene00020146
WBGene00004423
WBGene00020812
WBGene00022518
WBGene00016544
WBGene00022129
WBGene00017447
WBGene00010947
WBGene00007976
WBGene00019895
WBGene00003813
WBGene00001089
WBGene00009469
WBGene00004311
WBGene00004988
WBGene00004235
WBGene00022856
WBGene00012722
WBGene00001403
WBGene00011661
WBGene00011064
WBGene00004076
WBGene00009899
WBGene00011182
WBGene00001795
WBGene00000039
WBGene00007368
WBGene00010408
WBGene00019612
WBGene00016415
WBGene00009888
WBGene00011803
WBGene00020756
WBGene00001602
WBGene00022072
WBGene00015709
WBGene00004249
WBGene00009995
WBGene00021340
WBGene00016943
WBGene00043062
WBGene00010967
WBGene00022745
WBGene00044605
WBGene00014224
WBGene00011207
WBGene00002057
WBGene00004062
WBGene00016274
WBGene00001177
WBGene00000775
WBGene00022389
WBGene00006947
WBGene00003511
WBGene00008239
WBGene00016644
WBGene00001243
WBGene00008199
WBGene00009577
WBGene00006917
WBGene00017241
WBGene00015793
WBGene00011291
WBGene00001570
WBGene00013560
WBGene00016150
WBGene00010507
WBGene00009388
WBGene00007257
WBGene00009816
WBGene00001398
WBGene00000993
WBGene00019554
WBGene00016247
WBGene00019492
WBGene00010725
WBGene00006920
WBGene00010540
WBGene00017071
WBGene00015476
WBGene00007536
WBGene00011548
WBGene00017437
WBGene00002041
WBGene00010049
WBGene00001251
WBGene00011974
WBGene00000114
WBGene00000674
WBGene00004264
WBGene00001399
WBGene00007175
WBGene00021252
WBGene00008945
WBGene00007422
WBGene00009582
WBGene00015141
WBGene00004989
WBGene00000749
WBGene00021020
WBGene00003056
WBGene00006788
WBGene00003728
WBGene00019660
WBGene00015814
WBGene00020576
WBGene00000073
WBGene00017023
WBGene00019935
WBGene00018488
WBGene00020649
WBGene00015803
WBGene00010370
WBGene00016429
WBGene00012615
WBGene00000216
WBGene00021893
WBGene00007071
WBGene00013176
WBGene00012968
WBGene00019074
WBGene00013541
WBGene00017948
WBGene00020280
WBGene00001113
WBGene00021248
WBGene00004981
WBGene00010290
WBGene00017563
WBGene00004140
WBGene00022666
WBGene00014505
WBGene00003915
WBGene00000005
WBGene00020908
WBGene00014095
WBGene00022073
WBGene00016728
WBGene00009408
WBGene00022813
WBGene00015565
WBGene00019272
WBGene00017310
WBGene00018572
WBGene00021286
WBGene00001761
WBGene00020507
WBGene00006592
WBGene00000655
WBGene00000252
WBGene00019589
WBGene00004856
WBGene00022612
WBGene00004890
WBGene00009981
WBGene00018823
WBGene00020369
WBGene00014150
WBGene00001863
WBGene00000118
WBGene00015910
WBGene00010083
WBGene00009677
WBGene00000786
WBGene00004926
WBGene00016469
WBGene00016714
WBGene00013459
WBGene00017427
WBGene00004003
WBGene00020658
WBGene00007695
WBGene00009259
WBGene00001385
WBGene00014252
WBGene00004194
WBGene00019394
WBGene00018725
WBGene00018744
WBGene00011361
WBGene00001468
WBGene00019867
WBGene00016423
WBGene00018375
WBGene00001250
WBGene00010774
WBGene00022611
WBGene00015336
WBGene00021148
WBGene00008372
WBGene00016329
WBGene00003690
WBGene00020799
WBGene00000443
WBGene00008986
WBGene00001636
WBGene00011380
WBGene00000973
WBGene00000083
WBGene00006524
WBGene00011821
WBGene00002259
WBGene00003015
WBGene00007685
WBGene00020378
WBGene00020396
WBGene00012939
WBGene00013872
WBGene00019592
WBGene00012712
WBGene00003996
WBGene00012987
WBGene00007414
WBGene00021635
WBGene00016848
WBGene00007904
WBGene00006353
WBGene00008476
WBGene00000406
WBGene00004195
WBGene00022549
WBGene00017012
WBGene00008656
WBGene00013136
WBGene00003112
WBGene00000988
WBGene00021059
WBGene00021495
WBGene00044073
WBGene00022412
WBGene00002138
WBGene00022644
WBGene00011753
WBGene00017463
WBGene00008730
WBGene00012158
WBGene00007068
WBGene00022201
WBGene00003580
WBGene00000239
WBGene00018604
WBGene00019846
WBGene00003956
WBGene00003847
WBGene00008917
WBGene00022415
WBGene00000070
WBGene00003727
WBGene00019813
WBGene00007142
WBGene00016655
WBGene00007775
WBGene00003732
WBGene00010117
WBGene00077693
WBGene00016631
WBGene00014562
WBGene00007296
WBGene00044468
WBGene00003007
WBGene00011796
WBGene00010266
WBGene00015752
WBGene00006921
WBGene00001844
WBGene00000179
WBGene00011990
WBGene00022593
WBGene00011579
WBGene00012216
WBGene00018743
WBGene00019932
WBGene00019743
WBGene00011222
WBGene00023500
WBGene00001330
WBGene00008712
WBGene00004875
WBGene00019017
WBGene00020143
WBGene00008127
WBGene00000170
WBGene00013197
WBGene00010749
WBGene00013207
WBGene00018275
WBGene00011423
WBGene00007689
WBGene00020811
WBGene00001758
WBGene00006351
WBGene00018921
WBGene00219304
WBGene00019273
WBGene00185092
WBGene00005002
WBGene00000831
WBGene00015551
WBGene00016704
WBGene00020895
WBGene00016705
WBGene00001459
WBGene00020517
WBGene00006367
WBGene00020343
WBGene00000225
WBGene00008644
WBGene00000007
WBGene00004000
WBGene00008200
WBGene00010204
WBGene00016103
WBGene00001581
WBGene00020581
WBGene00020229
WBGene00019957
WBGene00000178
WBGene00044556
WBGene00002065
WBGene00018984
WBGene00021768
WBGene00004225
WBGene00010887
WBGene00000103
WBGene00011089
WBGene00044049
WBGene00000967
WBGene00021415
WBGene00001099
WBGene00044776
WBGene00013852
WBGene00006912
WBGene00001681
WBGene00016934
WBGene00003173
WBGene00003553
WBGene00000198
WBGene00016970
WBGene00006696
WBGene00017537
WBGene00220190
WBGene00009686
WBGene00016629
WBGene00000210
WBGene00018516
WBGene00016020
WBGene00010646
WBGene00012127
WBGene00011128
WBGene00015400
WBGene00022047
WBGene00008925
WBGene00001432
WBGene00012531
WBGene00012035
WBGene00044296
WBGene00008964
WBGene00010317
WBGene00018971
WBGene00013643
WBGene00002137
WBGene00008548
WBGene00020847
WBGene00015510
WBGene00011374
WBGene00004202
WBGene00010134
WBGene00001976
WBGene00012324
WBGene00011398
WBGene00019590
WBGene00016134
WBGene00020952
WBGene00007267
WBGene00010503
WBGene00000969
WBGene00012418
WBGene00000991
WBGene00010116
WBGene00016797
WBGene00019176
WBGene00198497
WBGene00010993
WBGene00021603
WBGene00007557
WBGene00019937
WBGene00015067
WBGene00000241
WBGene00020967
WBGene00016319
WBGene00019100
WBGene00006919
WBGene00001239
WBGene00045269
WBGene00009274
WBGene00017335
WBGene00020215
WBGene00011082
WBGene00000302
WBGene00018101
WBGene00044445
WBGene00019819
WBGene00013457
WBGene00011440
WBGene00020491
WBGene00015647
WBGene00000221
WBGene00219307
WBGene00019493
WBGene00000789
WBGene00013562
WBGene00019198
WBGene00019994
WBGene00018576
WBGene00010977
WBGene00021008
WBGene00009057
WBGene00019097
WBGene00016838
WBGene00015965
WBGene00003748
WBGene00022382
WBGene00044792
WBGene00008101
WBGene00019185
WBGene00019521
WBGene00001786
WBGene00014141
WBGene00019407
WBGene00016757
WBGene00010222
WBGene00009620
WBGene00015823
WBGene00009722
WBGene00020612
WBGene00004773
WBGene00015767
WBGene00004020
WBGene00000618
WBGene00005001
WBGene00013317
WBGene00012494
WBGene00004922
WBGene00019720
WBGene00012452
WBGene00013367
WBGene00044469
WBGene00019741
WBGene00021235
WBGene00002243
WBGene00019488
WBGene00004010
WBGene00001719
WBGene00001631
WBGene00013692
WBGene00045507
WBGene00002174
WBGene00010397
WBGene00007925
WBGene00001843
WBGene00018730
WBGene00013575
WBGene00008954
WBGene00022353
WBGene00016749
WBGene00018718
WBGene00010214
WBGene00012259
WBGene00000882
WBGene00008229
WBGene00002258
WBGene00018217
WBGene00014821
WBGene00006915
WBGene00004219
WBGene00008793
WBGene00019490
WBGene00016450
WBGene00010357
WBGene00009288
WBGene00019958
WBGene00003607
WBGene00016174
WBGene00019742
WBGene00009818
WBGene00001790
WBGene00018853
WBGene00007228
WBGene00009798
WBGene00007605
WBGene00013284
WBGene00016431
WBGene00004950
WBGene00016542
WBGene00019477
WBGene00015882
WBGene00015865
WBGene00016335
WBGene00003730
WBGene00008763
WBGene00019435
WBGene00019593
WBGene00019580
WBGene00000219
WBGene00020557
WBGene00009058
WBGene00004986
WBGene00011095
WBGene00008820
WBGene00017678
WBGene00019154
WBGene00019617
WBGene00003720
WBGene00015107
WBGene00016874
WBGene00009706
WBGene00000040
WBGene00013484
WBGene00012791
WBGene00016683
WBGene00014666
WBGene00022063
WBGene00013906
WBGene00001182
WBGene00000207
WBGene00002139
WBGene00012464
WBGene00016599
WBGene00009450
WBGene00020740
WBGene00017969
WBGene00000281
WBGene00019322
WBGene00010983
WBGene00020340
WBGene00007743
WBGene00016891
WBGene00003786
WBGene00009918
WBGene00019803
WBGene00003053
WBGene00021879
WBGene00013321
WBGene00001244
WBGene00015263
WBGene00019986
WBGene00019092
WBGene00010742
WBGene00195170
WBGene00007402
WBGene00219271
WBGene00020382
WBGene00008560
WBGene00021531
WBGene00011924
WBGene00044389
WBGene00013752
WBGene00021817
WBGene00219770
WBGene00008987
WBGene00018060
WBGene00007254
WBGene00045212
WBGene00000858
WBGene00011487
WBGene00003550
WBGene00016988
WBGene00000246
WBGene00015279
WBGene00219289
WBGene00003890
WBGene00022276
WBGene00003564
WBGene00014052
WBGene00007375
WBGene00000139
WBGene00008900
WBGene00010386
WBGene00019620
WBGene00008806
WBGene00001644
WBGene00003165
WBGene00000002
WBGene00015956
WBGene00013761
WBGene00044418
WBGene00000218
WBGene00009663
WBGene00009973
WBGene00010063
WBGene00000442
WBGene00019540
WBGene00015064
WBGene00006454
WBGene00009389
WBGene00019148
WBGene00020662
WBGene00000968
WBGene00012404
WBGene00009438
WBGene00006714
WBGene00020359
WBGene00020082
WBGene00019486
WBGene00016190
WBGene00015381
WBGene00010179
WBGene00044640
WBGene00009483
WBGene00007388
WBGene00008390
WBGene00012162
WBGene00018724
WBGene00018035
WBGene00019057
WBGene00004395
WBGene00015716
WBGene00002101
WBGene00003093
WBGene00014138
WBGene00012857
WBGene00008692
WBGene00011106
WBGene00015885
WBGene00007214
WBGene00009895
WBGene00007393
WBGene00000214
WBGene00006533
WBGene00020883
WBGene00010834
WBGene00194769
WBGene00018194
WBGene00018779
WBGene00007808
WBGene00011439
WBGene00021480
WBGene00018400
WBGene00004198
WBGene00000523
WBGene00022196
WBGene00001522
WBGene00020577
WBGene00001791
WBGene00015802
WBGene00019212
WBGene00013203
WBGene00019963
WBGene00001824
WBGene00000514
WBGene00006212
WBGene00016572
WBGene00008435
WBGene00009434
WBGene00020522
WBGene00021296
WBGene00018263
WBGene00007745
WBGene00003214
WBGene00003704
WBGene00009586
WBGene00015300
WBGene00016677
WBGene00011181
WBGene00014003
WBGene00016571
WBGene00021602
WBGene00016282
WBGene00009340
WBGene00220165
WBGene00022200
WBGene00007807
WBGene00015695
WBGene00013118
WBGene00020358
WBGene00044631
WBGene00017369
WBGene00000979
WBGene00012728
WBGene00017727
WBGene00044457
WBGene00012782
WBGene00004193
WBGene00044512
WBGene00019285
WBGene00001389
WBGene00202095
WBGene00010659
WBGene00013690
WBGene00015739
WBGene00009796
WBGene00020972
WBGene00011893
WBGene00007522
WBGene00012911
WBGene00018907
WBGene00001557
WBGene00016975
WBGene00007779
WBGene00235268
WBGene00019779
WBGene00020307
WBGene00012923
WBGene00001465
WBGene00018738
WBGene00003571
WBGene00001501
WBGene00013904
WBGene00018210
WBGene00017013
WBGene00020022
WBGene00017765
WBGene00006948
WBGene00011339
WBGene00019914
WBGene00007680
WBGene00020249
WBGene00010605
WBGene00022179
WBGene00019320
WBGene00019865
WBGene00016906
WBGene00000929
WBGene00009886
WBGene00013594
WBGene00000067
WBGene00020104
WBGene00002039
WBGene00020837
WBGene00017340
WBGene00012032
WBGene00019805
WBGene00001373
WBGene00012540
WBGene00008132
WBGene00013119
WBGene00012253
WBGene00011307
WBGene00019225
WBGene00017464
WBGene00017719
WBGene00011094
WBGene00015284
WBGene00009432
WBGene00011571
WBGene00015135
WBGene00023417
WBGene00009026
WBGene00013755
WBGene00021600
WBGene00194659
WBGene00168399
WBGene00008923
WBGene00016066
WBGene00003999
WBGene00012525
WBGene00015946
WBGene00012407
WBGene00001450
WBGene00017936
WBGene00017128
WBGene00007185
WBGene00013035
WBGene00015389
WBGene00012429
WBGene00044796
WBGene00011083
WBGene00007937
WBGene00019105
WBGene00013216
WBGene00013650
WBGene00235352
WBGene00003670
WBGene00006561
WBGene00007959
WBGene00003828
WBGene00010571
WBGene00011957
WBGene00016684
WBGene00018100
WBGene00016132
WBGene00077514
WBGene00011102
WBGene00020483
WBGene00000215
WBGene00009843
WBGene00007692
WBGene00010851
WBGene00021159
WBGene00006621
WBGene00019022
WBGene00009943
WBGene00022076
WBGene00012628
WBGene00013819
WBGene00002055
WBGene00003877
WBGene00011684
WBGene00016996
WBGene00235315
WBGene00009628
WBGene00007404
WBGene00004793
WBGene00003723
WBGene00010657
WBGene00002891
WBGene00000966
WBGene00011546
WBGene00010597
WBGene00013982
WBGene00017176
WBGene00010442
WBGene00018729
WBGene00001707
WBGene00013947
WBGene00001150
WBGene00017123
WBGene00006522
WBGene00009024
WBGene00021565
WBGene00007565
WBGene00219619
WBGene00020902
WBGene00014244
WBGene00017416
WBGene00004860
WBGene00004134
WBGene00020765
WBGene00012834
WBGene00011936
WBGene00017957
WBGene00021852
WBGene00017309
WBGene00015311
WBGene00004006
WBGene00010850
WBGene00010073
WBGene00001430
WBGene00008564
WBGene00017991
WBGene00004030
WBGene00008075
WBGene00007152
WBGene00018622
WBGene00015469
WBGene00004990
WBGene00000972
WBGene00003175
WBGene00012866
WBGene00007483
WBGene00020360
WBGene00013146
WBGene00010086
WBGene00021337
WBGene00018811
WBGene00004197
WBGene00008205
WBGene00003376
WBGene00007431
WBGene00011019
WBGene00007394
WBGene00003107
WBGene00020800
WBGene00003761
WBGene00001774
WBGene00012282
WBGene00007650
WBGene00012201
WBGene00010340
WBGene00004999
WBGene00002272
WBGene00019268
WBGene00015713
WBGene00022325
WBGene00044607
WBGene00006679
WBGene00015783
WBGene00009515
WBGene00011107
WBGene00000395
WBGene00021190
WBGene00012487
WBGene00003739
WBGene00003968
WBGene00013716
WBGene00011665
WBGene00022574
WBGene00008395
WBGene00020194
WBGene00001240
WBGene00198772
WBGene00045246
WBGene00020592
WBGene00044166
WBGene00001775
WBGene00000172
WBGene00175031
WBGene00007174
WBGene00018256
WBGene00014137
WBGene00016758
WBGene00001819
WBGene00002242
WBGene00021247
WBGene00022591
WBGene00000684
WBGene00015259
WBGene00008375
WBGene00013489
WBGene00015728
WBGene00021873
WBGene00000529
WBGene00015608
WBGene00008607
WBGene00001156
WBGene00000677
WBGene00020004
WBGene00017151
WBGene00010644
WBGene00003178
WBGene00018418
WBGene00011836
WBGene00011353
WBGene00004196
WBGene00001463
WBGene00008578
WBGene00000981
WBGene00003689
WBGene00012446
WBGene00014206
WBGene00011021
WBGene00022597
WBGene00011055
WBGene00020450
WBGene00045365
WBGene00011671
WBGene00044530
WBGene00018146
WBGene00004229
WBGene00003033
WBGene00020855
WBGene00002273
WBGene00003006
WBGene00001814
WBGene00001721
WBGene00018280
WBGene00001953
WBGene00000992
WBGene00010752
WBGene00021731
WBGene00020245
WBGene00008583
WBGene00003471
WBGene00006510
WBGene00001993
WBGene00002282
WBGene00000857
WBGene00007848
WBGene00016760
WBGene00220000
WBGene00020911
WBGene00000022
WBGene00020722
WBGene00003958
WBGene00017914
WBGene00018052
WBGene00020690
WBGene00022893
WBGene00044988
WBGene00000391
WBGene00220236
WBGene00018393
WBGene00001157
WBGene00008673
WBGene00021583
WBGene00013637
WBGene00008542
WBGene00016424
WBGene00021529
WBGene00011076
WBGene00019650
WBGene00021532
WBGene00009094
WBGene00017819
WBGene00020139
WBGene00021325
WBGene00044045
WBGene00008584
WBGene00009773
WBGene00001204
WBGene00007963
WBGene00019318
WBGene00044401
WBGene00014774
WBGene00001070
WBGene00020436
WBGene00016034
WBGene00017962
WBGene00017691
WBGene00022867
WBGene00011856
WBGene00017417
WBGene00016155
WBGene00003909
WBGene00009635
WBGene00000870
WBGene00019849
WBGene00000088
WBGene00000928
WBGene00002067
WBGene00019597
WBGene00020591
WBGene00002285
WBGene00010745
WBGene00015019
WBGene00012408
WBGene00045340
WBGene00016872
WBGene00008799
WBGene00022471
WBGene00008905
WBGene00012941
WBGene00003106
WBGene00016973
WBGene00015913
WBGene00019599
WBGene00021586
WBGene00010628
WBGene00008273
WBGene00018951
WBGene00003179
WBGene00011059
WBGene00011833
WBGene00014864
WBGene00009926
WBGene00020788
WBGene00007891
WBGene00016294
WBGene00017591
WBGene00015471
WBGene00022146
WBGene00003713
WBGene00004059
WBGene00020487
WBGene00022868
WBGene00004191
WBGene00012699
WBGene00009056
WBGene00016204
WBGene00000745
WBGene00017881
WBGene00000402
WBGene00012255
WBGene00023404
WBGene00012256
WBGene00010123
WBGene00013007
WBGene00007275
WBGene00003681
WBGene00016877
WBGene00007724
WBGene00000515
WBGene00019520
WBGene00012251
WBGene00001064
WBGene00022411
WBGene00015167
WBGene00012648
WBGene00019855
WBGene00018174
WBGene00010456
WBGene00022274
WBGene00012545
WBGene00010835
WBGene00012758
WBGene00022024
WBGene00022873
WBGene00017813
WBGene00000983
WBGene00019345
WBGene00001065
WBGene00001692
WBGene00020365
WBGene00007392
WBGene00021895
WBGene00020615
WBGene00011593
WBGene00000722
WBGene00006670
WBGene00007423
WBGene00000624
WBGene00018043
WBGene00003957
WBGene00003171
WBGene00003941
WBGene00018945
WBGene00001458
WBGene00019282
WBGene00003943
WBGene00020250
WBGene00011184
WBGene00012018
WBGene00021590
WBGene00001702
WBGene00000673
WBGene00017965
WBGene00010321
WBGene00001805
WBGene00015152
WBGene00010793
WBGene00013673
WBGene00012909
WBGene00012664
WBGene00010514
WBGene00016422
WBGene00009371
WBGene00010658
WBGene00000220
WBGene00004024
WBGene00021518
WBGene00013548
WBGene00015298
WBGene00001069
WBGene00009237
WBGene00016664
WBGene00002051
WBGene00077521
WBGene00009787
WBGene00015932
WBGene00006897
WBGene00017703
WBGene00012261
WBGene00022645
WBGene00010881
WBGene00008354
WBGene00021963
WBGene00021322
WBGene00013037
WBGene00012202
WBGene00000399
WBGene00003094
WBGene00004334
WBGene00004211
WBGene00012186
WBGene00001071
WBGene00009495
WBGene00007130
WBGene00000240
WBGene00020574
WBGene00000539
WBGene00012134
WBGene00019550
WBGene00011023
WBGene00012783
WBGene00012445
WBGene00007590
WBGene00021976
WBGene00008629
WBGene00003029
WBGene00008511
WBGene00001816
WBGene00000705
WBGene00021850
WBGene00015933
WBGene00007964
WBGene00007945
WBGene00015949
WBGene00019187
WBGene00015376
WBGene00010068
WBGene00022012
WBGene00007236
WBGene00007479
WBGene00017654
WBGene00017570
WBGene00010928
WBGene00020873
WBGene00017375
WBGene00007408
WBGene00001190
WBGene00001072
WBGene00011668
WBGene00219208
WBGene00219242
WBGene00022104
WBGene00009431
WBGene00045316
WBGene00023489
WBGene00010925
WBGene00044663
WBGene00045390
WBGene00001174
WBGene00002181
WBGene00077775
WBGene00017320
WBGene00000702
WBGene00018354
WBGene00013485
WBGene00005110
WBGene00008043
WBGene00006610
WBGene00009430
WBGene00013076
WBGene00012257
WBGene00010296
WBGene00019213
WBGene00011287
WBGene00021587
WBGene00008567
WBGene00003779
WBGene00003233
WBGene00008654
WBGene00018342
WBGene00017600
WBGene00019973
WBGene00044488
WBGene00012635
WBGene00016064
WBGene00018760
WBGene00045480
WBGene00010205
WBGene00006983
WBGene00001699
WBGene00003959
WBGene00020501
WBGene00017443
WBGene00219655
WBGene00016759
WBGene00002393
WBGene00008553
WBGene00017421
WBGene00011024
WBGene00003758
WBGene00017947
WBGene00015268
WBGene00235332
WBGene00010226
WBGene00016755
WBGene00012796
WBGene00015523
WBGene00000623
WBGene00007693
WBGene00008220
WBGene00006366
WBGene00003335
WBGene00007253
WBGene00020083
WBGene00003719
WBGene00019291
WBGene00021448
WBGene00009146
WBGene00018885
WBGene00002827
WBGene00014838
WBGene00023271
WBGene00008762
WBGene00220198
WBGene00015047
WBGene00013316
WBGene00003547
WBGene00000009
WBGene00007608
WBGene00010902
WBGene00007946
WBGene00020516
WBGene00009292
WBGene00018939
WBGene00044681
WBGene00018237
WBGene00023416
WBGene00199816
WBGene00044679
WBGene00011952
WBGene00000620
WBGene00000726
WBGene00007494
WBGene00044544
WBGene00020728
WBGene00015609
WBGene00015116
WBGene00009560
WBGene00008519
WBGene00015795
WBGene00000136
WBGene00015879
WBGene00011328
WBGene00011913
WBGene00009014
WBGene00011022
WBGene00022370
WBGene00006665
WBGene00016957
WBGene00206418
WBGene00004007
WBGene00000541
WBGene00006636
WBGene00018707
WBGene00022245
WBGene00004224
WBGene00006956
WBGene00003750
WBGene00019146
WBGene00001188
WBGene00201201
WBGene00198996
WBGene00016769
WBGene00021892
WBGene00000434
WBGene00010033
WBGene00019753
WBGene00015281
WBGene00045404
WBGene00005131
WBGene00016671
WBGene00010516
WBGene00044797
WBGene00011850
WBGene00219423
WBGene00017334
WBGene00013946
WBGene00020484
WBGene00017418
WBGene00022816
WBGene00007112
WBGene00015257
WBGene00009813
WBGene00014235
WBGene00017535
WBGene00007867
WBGene00206522
WBGene00017658
WBGene00008152
WBGene00008292
WBGene00001068
WBGene00008565
WBGene00019374
WBGene00009030
WBGene00003755
WBGene00016436
WBGene00013103
WBGene00022061
WBGene00008598
WBGene00009047
WBGene00007866
WBGene00022261
WBGene00012396
WBGene00011407
WBGene00019495
WBGene00008963
WBGene00008634
WBGene00198458
WBGene00020688
WBGene00018289
WBGene00017879
WBGene00016577
WBGene00019619
WBGene00012596
WBGene00008462
WBGene00020302
WBGene00008038
WBGene00013820
WBGene00010034
WBGene00044772
WBGene00007331
WBGene00019368
WBGene00007875
WBGene00013568
WBGene00013104
WBGene00018295
WBGene00009429
WBGene00020741
WBGene00044074
WBGene00023444
WBGene00008472
WBGene00022156
WBGene00015605
WBGene00001626
WBGene00044617
WBGene00001668
WBGene00012597
WBGene00004335
WBGene00017020
WBGene00017019
WBGene00255598

## Sheet: F3set9set26up
up-regulated gene in F3 set-9 set-26 double mutant from RNA-seq
WBGene00000013
WBGene00000019
WBGene00000023
WBGene00000025
WBGene00000027
WBGene00000074
WBGene00000082
WBGene00000102
WBGene00000157
WBGene00000301
WBGene00000373
WBGene00000396
WBGene00000425
WBGene00000460
WBGene00000485
WBGene00000519
WBGene00000544
WBGene00000546
WBGene00000558
WBGene00000591
WBGene00000603
WBGene00000610
WBGene00000611
WBGene00000625
WBGene00000626
WBGene00000634
WBGene00000639
WBGene00000641
WBGene00000650
WBGene00000653
WBGene00000664
WBGene00000678
WBGene00000681
WBGene00000685
WBGene00000687
WBGene00000689
WBGene00000695
WBGene00000704
WBGene00000706
WBGene00000710
WBGene00000730
WBGene00000734
WBGene00000735
WBGene00000738
WBGene00000745
WBGene00000746
WBGene00000747
WBGene00000797
WBGene00000803
WBGene00000865
WBGene00000878
WBGene00000989
WBGene00001066
WBGene00001067
WBGene00001074
WBGene00001075
WBGene00001076
WBGene00001109
WBGene00001123
WBGene00001170
WBGene00001245
WBGene00001335
WBGene00001387
WBGene00001390
WBGene00001425
WBGene00001500
WBGene00001506
WBGene00001564
WBGene00001569
WBGene00001577
WBGene00001583
WBGene00001603
WBGene00001666
WBGene00001700
WBGene00001703
WBGene00001725
WBGene00001731
WBGene00001752
WBGene00001764
WBGene00001772
WBGene00001854
WBGene00001858
WBGene00001875
WBGene00001876
WBGene00001877
WBGene00001878
WBGene00001879
WBGene00001880
WBGene00001881
WBGene00001882
WBGene00001890
WBGene00001891
WBGene00001892
WBGene00001905
WBGene00001906
WBGene00001910
WBGene00001912
WBGene00001914
WBGene00002016
WBGene00002017
WBGene00002018
WBGene00002026
WBGene00002114
WBGene00002120
WBGene00002124
WBGene00002131
WBGene00002186
WBGene00002227
WBGene00003058
WBGene00003075
WBGene00003089
WBGene00003090
WBGene00003091
WBGene00003104
WBGene00003185
WBGene00003219
WBGene00003231
WBGene00003424
WBGene00003432
WBGene00003434
WBGene00003443
WBGene00003456
WBGene00003457
WBGene00003467
WBGene00003469
WBGene00003497
WBGene00003527
WBGene00003545
WBGene00003554
WBGene00003601
WBGene00003761
WBGene00003771
WBGene00003772
WBGene00003879
WBGene00003887
WBGene00003965
WBGene00003970
WBGene00003981
WBGene00004002
WBGene00004017
WBGene00004089
WBGene00004091
WBGene00004115
WBGene00004118
WBGene00004122
WBGene00004127
WBGene00004133
WBGene00004148
WBGene00004150
WBGene00004154
WBGene00004217
WBGene00004230
WBGene00004232
WBGene00004234
WBGene00004300
WBGene00004377
WBGene00004509
WBGene00004771
WBGene00004780
WBGene00004811
WBGene00004816
WBGene00004904
WBGene00004909
WBGene00004932
WBGene00004962
WBGene00004965
WBGene00004969
WBGene00004971
WBGene00004976
WBGene00005008
WBGene00005012
WBGene00005013
WBGene00006044
WBGene00006047
WBGene00006051
WBGene00006057
WBGene00006058
WBGene00006060
WBGene00006063
WBGene00006064
WBGene00006394
WBGene00006416
WBGene00006449
WBGene00006468
WBGene00006477
WBGene00006539
WBGene00006649
WBGene00006650
WBGene00006651
WBGene00006816
WBGene00006954
WBGene00006980
WBGene00006981
WBGene00007011
WBGene00007081
WBGene00007156
WBGene00007159
WBGene00007162
WBGene00007177
WBGene00007180
WBGene00007190
WBGene00007222
WBGene00007239
WBGene00007244
WBGene00007286
WBGene00007297
WBGene00007305
WBGene00007306
WBGene00007307
WBGene00007308
WBGene00007320
WBGene00007335
WBGene00007343
WBGene00007354
WBGene00007381
WBGene00007397
WBGene00007398
WBGene00007412
WBGene00007440
WBGene00007448
WBGene00007457
WBGene00007478
WBGene00007538
WBGene00007565
WBGene00007584
WBGene00007597
WBGene00007601
WBGene00007610
WBGene00007613
WBGene00007633
WBGene00007675
WBGene00007691
WBGene00007714
WBGene00007733
WBGene00007771
WBGene00007773
WBGene00007777
WBGene00007778
WBGene00007791
WBGene00007802
WBGene00007820
WBGene00007823
WBGene00007833
WBGene00007863
WBGene00007869
WBGene00007903
WBGene00007943
WBGene00007948
WBGene00007956
WBGene00007977
WBGene00007986
WBGene00007987
WBGene00007989
WBGene00007999
WBGene00008010
WBGene00008029
WBGene00008031
WBGene00008063
WBGene00008074
WBGene00008137
WBGene00008154
WBGene00008175
WBGene00008201
WBGene00008202
WBGene00008210
WBGene00008215
WBGene00008230
WBGene00008235
WBGene00008301
WBGene00008449
WBGene00008477
WBGene00008482
WBGene00008485
WBGene00008496
WBGene00008498
WBGene00008541
WBGene00008559
WBGene00008572
WBGene00008577
WBGene00008584
WBGene00008586
WBGene00008590
WBGene00008620
WBGene00008648
WBGene00008649
WBGene00008652
WBGene00008655
WBGene00008659
WBGene00008676
WBGene00008681
WBGene00008724
WBGene00008725
WBGene00008777
WBGene00008794
WBGene00008811
WBGene00008832
WBGene00008850
WBGene00008851
WBGene00008854
WBGene00008862
WBGene00008876
WBGene00008882
WBGene00008883
WBGene00008905
WBGene00008922
WBGene00008940
WBGene00008944
WBGene00008959
WBGene00008961
WBGene00008974
WBGene00008975
WBGene00009016
WBGene00009028
WBGene00009031
WBGene00009041
WBGene00009064
WBGene00009075
WBGene00009079
WBGene00009115
WBGene00009123
WBGene00009129
WBGene00009133
WBGene00009143
WBGene00009147
WBGene00009149
WBGene00009154
WBGene00009185
WBGene00009221
WBGene00009233
WBGene00009299
WBGene00009300
WBGene00009301
WBGene00009308
WBGene00009321
WBGene00009344
WBGene00009355
WBGene00009361
WBGene00009377
WBGene00009393
WBGene00009397
WBGene00009412
WBGene00009413
WBGene00009416
WBGene00009442
WBGene00009459
WBGene00009467
WBGene00009470
WBGene00009471
WBGene00009489
WBGene00009492
WBGene00009548
WBGene00009561
WBGene00009573
WBGene00009581
WBGene00009647
WBGene00009660
WBGene00009681
WBGene00009683
WBGene00009685
WBGene00009708
WBGene00009710
WBGene00009720
WBGene00009754
WBGene00009755
WBGene00009801
WBGene00009823
WBGene00009835
WBGene00009895
WBGene00009899
WBGene00009901
WBGene00009904
WBGene00009923
WBGene00009938
WBGene00009939
WBGene00009948
WBGene00009959
WBGene00009961
WBGene00009962
WBGene00009964
WBGene00009982
WBGene00009983
WBGene00010008
WBGene00010011
WBGene00010051
WBGene00010066
WBGene00010082
WBGene00010091
WBGene00010108
WBGene00010124
WBGene00010127
WBGene00010128
WBGene00010136
WBGene00010189
WBGene00010226
WBGene00010234
WBGene00010241
WBGene00010244
WBGene00010246
WBGene00010254
WBGene00010273
WBGene00010277
WBGene00010289
WBGene00010291
WBGene00010300
WBGene00010314
WBGene00010355
WBGene00010365
WBGene00010367
WBGene00010373
WBGene00010381
WBGene00010464
WBGene00010467
WBGene00010474
WBGene00010485
WBGene00010486
WBGene00010492
WBGene00010493
WBGene00010499
WBGene00010509
WBGene00010510
WBGene00010547
WBGene00010574
WBGene00010578
WBGene00010596
WBGene00010611
WBGene00010612
WBGene00010623
WBGene00010634
WBGene00010651
WBGene00010663
WBGene00010679
WBGene00010682
WBGene00010692
WBGene00010701
WBGene00010702
WBGene00010712
WBGene00010719
WBGene00010724
WBGene00010726
WBGene00010779
WBGene00010822
WBGene00010829
WBGene00010831
WBGene00010836
WBGene00010869
WBGene00010871
WBGene00010874
WBGene00010885
WBGene00010900
WBGene00010906
WBGene00010915
WBGene00010920
WBGene00010948
WBGene00010958
WBGene00010969
WBGene00010980
WBGene00011039
WBGene00011103
WBGene00011112
WBGene00011114
WBGene00011124
WBGene00011132
WBGene00011133
WBGene00011152
WBGene00011171
WBGene00011172
WBGene00011183
WBGene00011203
WBGene00011214
WBGene00011278
WBGene00011305
WBGene00011335
WBGene00011362
WBGene00011414
WBGene00011434
WBGene00011466
WBGene00011467
WBGene00011491
WBGene00011493
WBGene00011508
WBGene00011530
WBGene00011559
WBGene00011583
WBGene00011614
WBGene00011619
WBGene00011624
WBGene00011645
WBGene00011680
WBGene00011691
WBGene00011707
WBGene00011752
WBGene00011777
WBGene00011793
WBGene00011795
WBGene00011805
WBGene00011808
WBGene00011834
WBGene00011844
WBGene00011888
WBGene00011895
WBGene00011910
WBGene00011911
WBGene00011918
WBGene00011938
WBGene00011954
WBGene00011968
WBGene00011979
WBGene00011999
WBGene00012010
WBGene00012012
WBGene00012087
WBGene00012101
WBGene00012117
WBGene00012138
WBGene00012140
WBGene00012144
WBGene00012169
WBGene00012172
WBGene00012173
WBGene00012198
WBGene00012207
WBGene00012217
WBGene00012223
WBGene00012224
WBGene00012231
WBGene00012294
WBGene00012296
WBGene00012299
WBGene00012302
WBGene00012307
WBGene00012326
WBGene00012339
WBGene00012357
WBGene00012379
WBGene00012388
WBGene00012402
WBGene00012431
WBGene00012486
WBGene00012492
WBGene00012498
WBGene00012524
WBGene00012530
WBGene00012547
WBGene00012583
WBGene00012592
WBGene00012595
WBGene00012605
WBGene00012624
WBGene00012627
WBGene00012637
WBGene00012638
WBGene00012646
WBGene00012679
WBGene00012683
WBGene00012689
WBGene00012754
WBGene00012757
WBGene00012761
WBGene00012781
WBGene00012809
WBGene00012813
WBGene00012824
WBGene00012825
WBGene00012831
WBGene00012855
WBGene00012859
WBGene00012901
WBGene00012926
WBGene00012937
WBGene00012965
WBGene00013033
WBGene00013053
WBGene00013058
WBGene00013076
WBGene00013085
WBGene00013125
WBGene00013138
WBGene00013148
WBGene00013170
WBGene00013192
WBGene00013194
WBGene00013244
WBGene00013290
WBGene00013304
WBGene00013318
WBGene00013337
WBGene00013352
WBGene00013424
WBGene00013449
WBGene00013473
WBGene00013474
WBGene00013475
WBGene00013520
WBGene00013524
WBGene00013526
WBGene00013559
WBGene00013573
WBGene00013651
WBGene00013657
WBGene00013658
WBGene00013700
WBGene00013712
WBGene00013713
WBGene00013723
WBGene00013771
WBGene00013785
WBGene00013800
WBGene00013847
WBGene00013854
WBGene00013858
WBGene00013862
WBGene00013868
WBGene00013887
WBGene00013898
WBGene00013978
WBGene00013987
WBGene00013999
WBGene00014007
WBGene00014029
WBGene00014048
WBGene00014104
WBGene00014116
WBGene00014121
WBGene00014148
WBGene00014157
WBGene00014158
WBGene00014168
WBGene00014169
WBGene00014170
WBGene00014173
WBGene00014179
WBGene00014183
WBGene00014184
WBGene00014197
WBGene00014213
WBGene00014223
WBGene00014229
WBGene00014238
WBGene00014239
WBGene00014240
WBGene00014250
WBGene00014256
WBGene00014375
WBGene00014492
WBGene00014665
WBGene00014755
WBGene00014857
WBGene00014861
WBGene00014997
WBGene00015006
WBGene00015024
WBGene00015028
WBGene00015030
WBGene00015034
WBGene00015046
WBGene00015052
WBGene00015058
WBGene00015089
WBGene00015094
WBGene00015097
WBGene00015155
WBGene00015223
WBGene00015225
WBGene00015230
WBGene00015243
WBGene00015246
WBGene00015306
WBGene00015335
WBGene00015339
WBGene00015340
WBGene00015348
WBGene00015422
WBGene00015429
WBGene00015453
WBGene00015479
WBGene00015500
WBGene00015541
WBGene00015569
WBGene00015572
WBGene00015573
WBGene00015616
WBGene00015627
WBGene00015629
WBGene00015645
WBGene00015660
WBGene00015666
WBGene00015688
WBGene00015689
WBGene00015691
WBGene00015696
WBGene00015765
WBGene00015782
WBGene00015796
WBGene00015820
WBGene00015828
WBGene00015847
WBGene00015855
WBGene00015860
WBGene00015907
WBGene00015908
WBGene00015912
WBGene00015917
WBGene00015922
WBGene00015929
WBGene00015931
WBGene00015944
WBGene00015997
WBGene00016010
WBGene00016038
WBGene00016052
WBGene00016053
WBGene00016054
WBGene00016063
WBGene00016083
WBGene00016086
WBGene00016097
WBGene00016130
WBGene00016156
WBGene00016161
WBGene00016164
WBGene00016181
WBGene00016196
WBGene00016209
WBGene00016238
WBGene00016259
WBGene00016322
WBGene00016346
WBGene00016382
WBGene00016388
WBGene00016399
WBGene00016414
WBGene00016416
WBGene00016420
WBGene00016440
WBGene00016445
WBGene00016447
WBGene00016457
WBGene00016461
WBGene00016462
WBGene00016485
WBGene00016491
WBGene00016507
WBGene00016511
WBGene00016512
WBGene00016541
WBGene00016573
WBGene00016574
WBGene00016575
WBGene00016576
WBGene00016595
WBGene00016605
WBGene00016632
WBGene00016661
WBGene00016680
WBGene00016681
WBGene00016730
WBGene00016742
WBGene00016752
WBGene00016773
WBGene00016788
WBGene00016891
WBGene00016892
WBGene00016942
WBGene00016953
WBGene00016954
WBGene00016963
WBGene00016980
WBGene00016997
WBGene00017026
WBGene00017046
WBGene00017052
WBGene00017057
WBGene00017059
WBGene00017068
WBGene00017072
WBGene00017073
WBGene00017112
WBGene00017114
WBGene00017133
WBGene00017143
WBGene00017175
WBGene00017179
WBGene00017183
WBGene00017279
WBGene00017291
WBGene00017354
WBGene00017384
WBGene00017386
WBGene00017387
WBGene00017430
WBGene00017438
WBGene00017444
WBGene00017466
WBGene00017485
WBGene00017501
WBGene00017524
WBGene00017542
WBGene00017550
WBGene00017567
WBGene00017583
WBGene00017584
WBGene00017586
WBGene00017587
WBGene00017647
WBGene00017659
WBGene00017660
WBGene00017672
WBGene00017673
WBGene00017718
WBGene00017724
WBGene00017726
WBGene00017737
WBGene00017754
WBGene00017755
WBGene00017791
WBGene00017802
WBGene00017807
WBGene00017808
WBGene00017814
WBGene00017838
WBGene00017841
WBGene00017869
WBGene00017872
WBGene00017923
WBGene00017949
WBGene00017955
WBGene00017978
WBGene00018026
WBGene00018048
WBGene00018051
WBGene00018081
WBGene00018083
WBGene00018097
WBGene00018119
WBGene00018120
WBGene00018134
WBGene00018165
WBGene00018178
WBGene00018203
WBGene00018227
WBGene00018238
WBGene00018297
WBGene00018353
WBGene00018383
WBGene00018487
WBGene00018493
WBGene00018497
WBGene00018500
WBGene00018505
WBGene00018516
WBGene00018528
WBGene00018548
WBGene00018573
WBGene00018575
WBGene00018580
WBGene00018607
WBGene00018630
WBGene00018683
WBGene00018689
WBGene00018702
WBGene00018703
WBGene00018731
WBGene00018773
WBGene00018839
WBGene00018840
WBGene00018908
WBGene00018946
WBGene00018971
WBGene00018980
WBGene00019015
WBGene00019084
WBGene00019184
WBGene00019189
WBGene00019236
WBGene00019253
WBGene00019255
WBGene00019284
WBGene00019341
WBGene00019406
WBGene00019409
WBGene00019410
WBGene00019431
WBGene00019511
WBGene00019517
WBGene00019530
WBGene00019556
WBGene00019561
WBGene00019578
WBGene00019601
WBGene00019613
WBGene00019642
WBGene00019644
WBGene00019684
WBGene00019688
WBGene00019689
WBGene00019717
WBGene00019731
WBGene00019744
WBGene00019756
WBGene00019761
WBGene00019783
WBGene00019785
WBGene00019810
WBGene00019812
WBGene00019832
WBGene00019858
WBGene00019859
WBGene00019906
WBGene00019929
WBGene00019950
WBGene00019959
WBGene00019960
WBGene00019972
WBGene00019991
WBGene00020003
WBGene00020014
WBGene00020033
WBGene00020039
WBGene00020040
WBGene00020084
WBGene00020105
WBGene00020177
WBGene00020187
WBGene00020223
WBGene00020265
WBGene00020282
WBGene00020289
WBGene00020311
WBGene00020338
WBGene00020353
WBGene00020356
WBGene00020366
WBGene00020370
WBGene00020372
WBGene00020386
WBGene00020408
WBGene00020413
WBGene00020414
WBGene00020421
WBGene00020468
WBGene00020478
WBGene00020486
WBGene00020496
WBGene00020533
WBGene00020551
WBGene00020571
WBGene00020627
WBGene00020630
WBGene00020646
WBGene00020659
WBGene00020661
WBGene00020672
WBGene00020675
WBGene00020710
WBGene00020713
WBGene00020715
WBGene00020758
WBGene00020766
WBGene00020826
WBGene00020840
WBGene00020841
WBGene00020860
WBGene00020905
WBGene00020914
WBGene00020945
WBGene00020972
WBGene00020973
WBGene00020985
WBGene00020987
WBGene00020990
WBGene00020991
WBGene00021006
WBGene00021007
WBGene00021049
WBGene00021050
WBGene00021051
WBGene00021083
WBGene00021110
WBGene00021113
WBGene00021183
WBGene00021236
WBGene00021252
WBGene00021288
WBGene00021319
WBGene00021370
WBGene00021381
WBGene00021398
WBGene00021445
WBGene00021446
WBGene00021496
WBGene00021544
WBGene00021578
WBGene00021579
WBGene00021605
WBGene00021623
WBGene00021639
WBGene00021641
WBGene00021650
WBGene00021654
WBGene00021678
WBGene00021779
WBGene00021787
WBGene00021880
WBGene00021967
WBGene00021969
WBGene00021993
WBGene00021996
WBGene00022032
WBGene00022038
WBGene00022071
WBGene00022079
WBGene00022090
WBGene00022108
WBGene00022110
WBGene00022157
WBGene00022228
WBGene00022282
WBGene00022298
WBGene00022441
WBGene00022467
WBGene00022507
WBGene00022535
WBGene00022536
WBGene00022545
WBGene00022562
WBGene00022596
WBGene00022621
WBGene00022634
WBGene00022649
WBGene00022653
WBGene00022674
WBGene00022679
WBGene00022680
WBGene00022698
WBGene00022700
WBGene00022705
WBGene00022706
WBGene00022708
WBGene00022725
WBGene00022751
WBGene00022754
WBGene00022760
WBGene00022761
WBGene00022763
WBGene00022778
WBGene00022823
WBGene00022849
WBGene00022876
WBGene00022888
WBGene00022891
WBGene00023407
WBGene00023451
WBGene00023497
WBGene00023498
WBGene00023503
WBGene00043053
WBGene00043147
WBGene00043534
WBGene00043743
WBGene00044005
WBGene00044015
WBGene00044024
WBGene00044107
WBGene00044109
WBGene00044134
WBGene00044177
WBGene00044200
WBGene00044204
WBGene00044205
WBGene00044206
WBGene00044212
WBGene00044272
WBGene00044294
WBGene00044388
WBGene00044393
WBGene00044443
WBGene00044449
WBGene00044450
WBGene00044451
WBGene00044453
WBGene00044492
WBGene00044529
WBGene00044533
WBGene00044634
WBGene00044644
WBGene00044646
WBGene00044679
WBGene00044724
WBGene00044741
WBGene00044777
WBGene00045242
WBGene00045247
WBGene00045275
WBGene00045306
WBGene00045355
WBGene00045391
WBGene00045488
WBGene00050875
WBGene00050919
WBGene00050940
WBGene00077514
WBGene00077522
WBGene00077682
WBGene00077685
WBGene00077691
WBGene00077699
WBGene00184956
WBGene00189931
WBGene00189951
WBGene00194647
WBGene00194651
WBGene00194670
WBGene00194695
WBGene00194700
WBGene00194711
WBGene00194713
WBGene00194816
WBGene00197066
WBGene00206361
WBGene00206362
WBGene00206524
WBGene00219303
WBGene00219316
WBGene00219374
WBGene00219436
WBGene00219769
WBGene00219800
WBGene00219912
WBGene00220117
WBGene00220259
WBGene00235106
WBGene00235164
WBGene00235165
WBGene00235280
WBGene00235293
WBGene00235297
WBGene00255375

## Sheet: F3set9set26down
down-regulated gene in F3 set-9 set-26 double mutant from RNA-seq
WBGene00000003
WBGene00000006
WBGene00000008
WBGene00000016
WBGene00000017
WBGene00000022
WBGene00000038
WBGene00000040
WBGene00000067
WBGene00000083
WBGene00000110
WBGene00000112
WBGene00000115
WBGene00000136
WBGene00000176
WBGene00000178
WBGene00000207
WBGene00000214
WBGene00000215
WBGene00000216
WBGene00000219
WBGene00000225
WBGene00000229
WBGene00000230
WBGene00000282
WBGene00000379
WBGene00000395
WBGene00000399
WBGene00000502
WBGene00000523
WBGene00000526
WBGene00000539
WBGene00000550
WBGene00000599
WBGene00000616
WBGene00000618
WBGene00000623
WBGene00000624
WBGene00000673
WBGene00000677
WBGene00000691
WBGene00000702
WBGene00000717
WBGene00000720
WBGene00000722
WBGene00000733
WBGene00000739
WBGene00000740
WBGene00000741
WBGene00000742
WBGene00000743
WBGene00000749
WBGene00000767
WBGene00000770
WBGene00000781
WBGene00000785
WBGene00000802
WBGene00000833
WBGene00000869
WBGene00000870
WBGene00000871
WBGene00000879
WBGene00000882
WBGene00000928
WBGene00000931
WBGene00000963
WBGene00000968
WBGene00000969
WBGene00000972
WBGene00000976
WBGene00000981
WBGene00000983
WBGene00000988
WBGene00000992
WBGene00001028
WBGene00001031
WBGene00001044
WBGene00001064
WBGene00001065
WBGene00001068
WBGene00001069
WBGene00001070
WBGene00001071
WBGene00001072
WBGene00001137
WBGene00001158
WBGene00001204
WBGene00001239
WBGene00001240
WBGene00001243
WBGene00001251
WBGene00001320
WBGene00001389
WBGene00001395
WBGene00001396
WBGene00001398
WBGene00001399
WBGene00001401
WBGene00001423
WBGene00001430
WBGene00001501
WBGene00001503
WBGene00001581
WBGene00001592
WBGene00001620
WBGene00001621
WBGene00001626
WBGene00001631
WBGene00001632
WBGene00001692
WBGene00001699
WBGene00001702
WBGene00001713
WBGene00001753
WBGene00001754
WBGene00001776
WBGene00001789
WBGene00001795
WBGene00001796
WBGene00001814
WBGene00001815
WBGene00001819
WBGene00001856
WBGene00001921
WBGene00001983
WBGene00001993
WBGene00002010
WBGene00002025
WBGene00002034
WBGene00002039
WBGene00002054
WBGene00002065
WBGene00002067
WBGene00002070
WBGene00002079
WBGene00002083
WBGene00002128
WBGene00002162
WBGene00002183
WBGene00002200
WBGene00002348
WBGene00002393
WBGene00002827
WBGene00002850
WBGene00002891
WBGene00002915
WBGene00002976
WBGene00003007
WBGene00003015
WBGene00003047
WBGene00003093
WBGene00003094
WBGene00003100
WBGene00003107
WBGene00003130
WBGene00003148
WBGene00003162
WBGene00003225
WBGene00003233
WBGene00003246
WBGene00003514
WBGene00003517
WBGene00003528
WBGene00003553
WBGene00003564
WBGene00003566
WBGene00003567
WBGene00003573
WBGene00003613
WBGene00003622
WBGene00003625
WBGene00003626
WBGene00003628
WBGene00003670
WBGene00003681
WBGene00003704
WBGene00003706
WBGene00003711
WBGene00003731
WBGene00003762
WBGene00003764
WBGene00003765
WBGene00003773
WBGene00003788
WBGene00003813
WBGene00003877
WBGene00003943
WBGene00003958
WBGene00003964
WBGene00003968
WBGene00003995
WBGene00004000
WBGene00004004
WBGene00004008
WBGene00004014
WBGene00004015
WBGene00004020
WBGene00004034
WBGene00004038
WBGene00004044
WBGene00004076
WBGene00004077
WBGene00004094
WBGene00004119
WBGene00004124
WBGene00004134
WBGene00004144
WBGene00004173
WBGene00004175
WBGene00004194
WBGene00004196
WBGene00004222
WBGene00004224
WBGene00004226
WBGene00004227
WBGene00004257
WBGene00004311
WBGene00004321
WBGene00004359
WBGene00004395
WBGene00004411
WBGene00004414
WBGene00004475
WBGene00004487
WBGene00004735
WBGene00004736
WBGene00004878
WBGene00004902
WBGene00004981
WBGene00004987
WBGene00004989
WBGene00004993
WBGene00005036
WBGene00005663
WBGene00006059
WBGene00006351
WBGene00006366
WBGene00006367
WBGene00006374
WBGene00006433
WBGene00006439
WBGene00006544
WBGene00006583
WBGene00006586
WBGene00006589
WBGene00006607
WBGene00006626
WBGene00006642
WBGene00006672
WBGene00006686
WBGene00006706
WBGene00006740
WBGene00006749
WBGene00006796
WBGene00006861
WBGene00006910
WBGene00006911
WBGene00006913
WBGene00006914
WBGene00006915
WBGene00006917
WBGene00006919
WBGene00006920
WBGene00006921
WBGene00006924
WBGene00006925
WBGene00006936
WBGene00006937
WBGene00006956
WBGene00007008
WBGene00007056
WBGene00007068
WBGene00007071
WBGene00007103
WBGene00007108
WBGene00007112
WBGene00007142
WBGene00007178
WBGene00007185
WBGene00007200
WBGene00007201
WBGene00007202
WBGene00007231
WBGene00007232
WBGene00007233
WBGene00007236
WBGene00007275
WBGene00007296
WBGene00007299
WBGene00007331
WBGene00007362
WBGene00007385
WBGene00007402
WBGene00007430
WBGene00007450
WBGene00007474
WBGene00007479
WBGene00007482
WBGene00007515
WBGene00007517
WBGene00007530
WBGene00007536
WBGene00007537
WBGene00007541
WBGene00007543
WBGene00007544
WBGene00007615
WBGene00007637
WBGene00007650
WBGene00007685
WBGene00007686
WBGene00007692
WBGene00007724
WBGene00007728
WBGene00007729
WBGene00007736
WBGene00007787
WBGene00007804
WBGene00007807
WBGene00007808
WBGene00007817
WBGene00007848
WBGene00007867
WBGene00007894
WBGene00007938
WBGene00007964
WBGene00007969
WBGene00007993
WBGene00008003
WBGene00008028
WBGene00008078
WBGene00008127
WBGene00008167
WBGene00008205
WBGene00008229
WBGene00008262
WBGene00008284
WBGene00008334
WBGene00008354
WBGene00008359
WBGene00008390
WBGene00008392
WBGene00008413
WBGene00008415
WBGene00008490
WBGene00008495
WBGene00008505
WBGene00008511
WBGene00008542
WBGene00008567
WBGene00008578
WBGene00008583
WBGene00008598
WBGene00008628
WBGene00008634
WBGene00008640
WBGene00008692
WBGene00008707
WBGene00008762
WBGene00008963
WBGene00008964
WBGene00008978
WBGene00008995
WBGene00009008
WBGene00009057
WBGene00009081
WBGene00009082
WBGene00009090
WBGene00009094
WBGene00009096
WBGene00009097
WBGene00009108
WBGene00009113
WBGene00009119
WBGene00009146
WBGene00009161
WBGene00009173
WBGene00009189
WBGene00009237
WBGene00009243
WBGene00009246
WBGene00009259
WBGene00009307
WBGene00009319
WBGene00009334
WBGene00009336
WBGene00009340
WBGene00009352
WBGene00009367
WBGene00009374
WBGene00009383
WBGene00009384
WBGene00009408
WBGene00009440
WBGene00009450
WBGene00009453
WBGene00009526
WBGene00009575
WBGene00009620
WBGene00009624
WBGene00009628
WBGene00009635
WBGene00009664
WBGene00009688
WBGene00009722
WBGene00009772
WBGene00009787
WBGene00009865
WBGene00009896
WBGene00009926
WBGene00009971
WBGene00009980
WBGene00009993
WBGene00010034
WBGene00010052
WBGene00010083
WBGene00010094
WBGene00010117
WBGene00010130
WBGene00010135
WBGene00010147
WBGene00010204
WBGene00010225
WBGene00010263
WBGene00010304
WBGene00010317
WBGene00010321
WBGene00010357
WBGene00010419
WBGene00010453
WBGene00010456
WBGene00010458
WBGene00010472
WBGene00010478
WBGene00010582
WBGene00010595
WBGene00010624
WBGene00010627
WBGene00010630
WBGene00010638
WBGene00010727
WBGene00010738
WBGene00010759
WBGene00010780
WBGene00010813
WBGene00010834
WBGene00010835
WBGene00010850
WBGene00010851
WBGene00010888
WBGene00010896
WBGene00010941
WBGene00010989
WBGene00010993
WBGene00011003
WBGene00011015
WBGene00011054
WBGene00011055
WBGene00011061
WBGene00011089
WBGene00011095
WBGene00011105
WBGene00011106
WBGene00011107
WBGene00011128
WBGene00011166
WBGene00011239
WBGene00011273
WBGene00011284
WBGene00011286
WBGene00011307
WBGene00011328
WBGene00011333
WBGene00011334
WBGene00011353
WBGene00011398
WBGene00011407
WBGene00011408
WBGene00011435
WBGene00011446
WBGene00011480
WBGene00011488
WBGene00011522
WBGene00011526
WBGene00011531
WBGene00011533
WBGene00011538
WBGene00011676
WBGene00011684
WBGene00011694
WBGene00011708
WBGene00011717
WBGene00011744
WBGene00011753
WBGene00011838
WBGene00011891
WBGene00011927
WBGene00012007
WBGene00012018
WBGene00012037
WBGene00012085
WBGene00012094
WBGene00012097
WBGene00012104
WBGene00012123
WBGene00012143
WBGene00012149
WBGene00012158
WBGene00012186
WBGene00012197
WBGene00012201
WBGene00012253
WBGene00012255
WBGene00012256
WBGene00012257
WBGene00012261
WBGene00012315
WBGene00012324
WBGene00012354
WBGene00012361
WBGene00012407
WBGene00012418
WBGene00012439
WBGene00012443
WBGene00012445
WBGene00012472
WBGene00012529
WBGene00012538
WBGene00012545
WBGene00012564
WBGene00012596
WBGene00012597
WBGene00012635
WBGene00012648
WBGene00012659
WBGene00012714
WBGene00012728
WBGene00012750
WBGene00012796
WBGene00012803
WBGene00012861
WBGene00012883
WBGene00012911
WBGene00012941
WBGene00012943
WBGene00012967
WBGene00012968
WBGene00013007
WBGene00013025
WBGene00013030
WBGene00013035
WBGene00013037
WBGene00013055
WBGene00013074
WBGene00013079
WBGene00013080
WBGene00013104
WBGene00013136
WBGene00013169
WBGene00013180
WBGene00013203
WBGene00013267
WBGene00013311
WBGene00013365
WBGene00013435
WBGene00013438
WBGene00013458
WBGene00013489
WBGene00013499
WBGene00013515
WBGene00013540
WBGene00013543
WBGene00013575
WBGene00013594
WBGene00013668
WBGene00013693
WBGene00013716
WBGene00013727
WBGene00013766
WBGene00013808
WBGene00013853
WBGene00013901
WBGene00013950
WBGene00013975
WBGene00013986
WBGene00014003
WBGene00014057
WBGene00014095
WBGene00014125
WBGene00014176
WBGene00014206
WBGene00014224
WBGene00014258
WBGene00014666
WBGene00014667
WBGene00015047
WBGene00015056
WBGene00015059
WBGene00015131
WBGene00015235
WBGene00015248
WBGene00015268
WBGene00015280
WBGene00015298
WBGene00015313
WBGene00015332
WBGene00015410
WBGene00015413
WBGene00015434
WBGene00015439
WBGene00015449
WBGene00015450
WBGene00015456
WBGene00015464
WBGene00015471
WBGene00015476
WBGene00015509
WBGene00015510
WBGene00015514
WBGene00015523
WBGene00015551
WBGene00015713
WBGene00015734
WBGene00015752
WBGene00015755
WBGene00015795
WBGene00015802
WBGene00015857
WBGene00015885
WBGene00015941
WBGene00015949
WBGene00015956
WBGene00015980
WBGene00016011
WBGene00016018
WBGene00016020
WBGene00016023
WBGene00016103
WBGene00016258
WBGene00016264
WBGene00016283
WBGene00016412
WBGene00016419
WBGene00016422
WBGene00016425
WBGene00016431
WBGene00016442
WBGene00016535
WBGene00016544
WBGene00016583
WBGene00016607
WBGene00016644
WBGene00016652
WBGene00016653
WBGene00016655
WBGene00016659
WBGene00016683
WBGene00016702
WBGene00016721
WBGene00016728
WBGene00016749
WBGene00016759
WBGene00016763
WBGene00016799
WBGene00016844
WBGene00016898
WBGene00016907
WBGene00016934
WBGene00016996
WBGene00017019
WBGene00017020
WBGene00017062
WBGene00017071
WBGene00017075
WBGene00017124
WBGene00017126
WBGene00017154
WBGene00017184
WBGene00017201
WBGene00017245
WBGene00017262
WBGene00017283
WBGene00017311
WBGene00017321
WBGene00017340
WBGene00017364
WBGene00017369
WBGene00017398
WBGene00017426
WBGene00017443
WBGene00017464
WBGene00017482
WBGene00017506
WBGene00017535
WBGene00017536
WBGene00017537
WBGene00017569
WBGene00017620
WBGene00017658
WBGene00017678
WBGene00017691
WBGene00017748
WBGene00017761
WBGene00017819
WBGene00017855
WBGene00017892
WBGene00017925
WBGene00017947
WBGene00017962
WBGene00017969
WBGene00017982
WBGene00018052
WBGene00018099
WBGene00018151
WBGene00018170
WBGene00018217
WBGene00018250
WBGene00018257
WBGene00018303
WBGene00018343
WBGene00018362
WBGene00018398
WBGene00018418
WBGene00018430
WBGene00018485
WBGene00018492
WBGene00018515
WBGene00018538
WBGene00018636
WBGene00018718
WBGene00018741
WBGene00018744
WBGene00018765
WBGene00018782
WBGene00018786
WBGene00018811
WBGene00018852
WBGene00018901
WBGene00018907
WBGene00018963
WBGene00018990
WBGene00019007
WBGene00019017
WBGene00019021
WBGene00019061
WBGene00019068
WBGene00019097
WBGene00019111
WBGene00019152
WBGene00019170
WBGene00019198
WBGene00019205
WBGene00019212
WBGene00019225
WBGene00019232
WBGene00019261
WBGene00019268
WBGene00019273
WBGene00019298
WBGene00019322
WBGene00019329
WBGene00019345
WBGene00019368
WBGene00019380
WBGene00019401
WBGene00019407
WBGene00019426
WBGene00019435
WBGene00019489
WBGene00019509
WBGene00019510
WBGene00019520
WBGene00019540
WBGene00019544
WBGene00019550
WBGene00019572
WBGene00019599
WBGene00019619
WBGene00019624
WBGene00019655
WBGene00019663
WBGene00019678
WBGene00019779
WBGene00019819
WBGene00019837
WBGene00019855
WBGene00019875
WBGene00019882
WBGene00019900
WBGene00019934
WBGene00019935
WBGene00019937
WBGene00019962
WBGene00019994
WBGene00020022
WBGene00020036
WBGene00020038
WBGene00020049
WBGene00020083
WBGene00020104
WBGene00020115
WBGene00020139
WBGene00020146
WBGene00020171
WBGene00020191
WBGene00020245
WBGene00020267
WBGene00020268
WBGene00020269
WBGene00020339
WBGene00020382
WBGene00020391
WBGene00020397
WBGene00020437
WBGene00020445
WBGene00020465
WBGene00020484
WBGene00020487
WBGene00020501
WBGene00020507
WBGene00020517
WBGene00020550
WBGene00020576
WBGene00020579
WBGene00020590
WBGene00020592
WBGene00020611
WBGene00020649
WBGene00020651
WBGene00020678
WBGene00020683
WBGene00020705
WBGene00020757
WBGene00020765
WBGene00020788
WBGene00020811
WBGene00020813
WBGene00020817
WBGene00020831
WBGene00020837
WBGene00020873
WBGene00020894
WBGene00020897
WBGene00020908
WBGene00020911
WBGene00020915
WBGene00020952
WBGene00020954
WBGene00020989
WBGene00021074
WBGene00021160
WBGene00021232
WBGene00021237
WBGene00021248
WBGene00021286
WBGene00021292
WBGene00021322
WBGene00021327
WBGene00021335
WBGene00021415
WBGene00021420
WBGene00021495
WBGene00021526
WBGene00021529
WBGene00021554
WBGene00021590
WBGene00021595
WBGene00021646
WBGene00021698
WBGene00021704
WBGene00021745
WBGene00021747
WBGene00021814
WBGene00021830
WBGene00021835
WBGene00021850
WBGene00021893
WBGene00021899
WBGene00021900
WBGene00021921
WBGene00021928
WBGene00021934
WBGene00021952
WBGene00022021
WBGene00022046
WBGene00022053
WBGene00022087
WBGene00022089
WBGene00022114
WBGene00022125
WBGene00022131
WBGene00022146
WBGene00022156
WBGene00022200
WBGene00022245
WBGene00022261
WBGene00022274
WBGene00022307
WBGene00022335
WBGene00022336
WBGene00022390
WBGene00022415
WBGene00022462
WBGene00022505
WBGene00022583
WBGene00022591
WBGene00022615
WBGene00022781
WBGene00022783
WBGene00022793
WBGene00022813
WBGene00022816
WBGene00022867
WBGene00023065
WBGene00023404
WBGene00023416
WBGene00023419
WBGene00023500
WBGene00043057
WBGene00043068
WBGene00044094
WBGene00044163
WBGene00044174
WBGene00044175
WBGene00044218
WBGene00044253
WBGene00044260
WBGene00044296
WBGene00044350
WBGene00044413
WBGene00044488
WBGene00044502
WBGene00044512
WBGene00044617
WBGene00044696
WBGene00044736
WBGene00044784
WBGene00044792
WBGene00044922
WBGene00045062
WBGene00045175
WBGene00045246
WBGene00045387
WBGene00045399
WBGene00045433
WBGene00045461
WBGene00045483
WBGene00045507
WBGene00050937
WBGene00077521
WBGene00077526
WBGene00077558
WBGene00077764
WBGene00119204
WBGene00196315
WBGene00198547
WBGene00198916
WBGene00198946
WBGene00200662
WBGene00200783
WBGene00201526
WBGene00219208
WBGene00219423
WBGene00219733
WBGene00220050
WBGene00235268
WBGene00255598

## Sheet: F1set9set26H3K4me3diff
genes with differential H3K4me3 level in F1 set-9 set-26
WBGene00022276
WBGene00021682
WBGene00004274
WBGene00018774
WBGene00003229
WBGene00000227
WBGene00004246
WBGene00021662
WBGene00021667
WBGene00002077
WBGene00235385
WBGene00002079
WBGene00021661
WBGene00020091
WBGene00020089
WBGene00021733
WBGene00015570
WBGene00006593
WBGene00022036
WBGene00022034
WBGene00022037
WBGene00022043
WBGene00007009
WBGene00022029
WBGene00022026
WBGene00021215
WBGene00021209
WBGene00004028
WBGene00021213
WBGene00001678
WBGene00018786
WBGene00004952
WBGene00021329
WBGene00021689
WBGene00000165
WBGene00021687
WBGene00001816
WBGene00021691
WBGene00001707
WBGene00019673
WBGene00022363
WBGene00022368
WBGene00018159
WBGene00004969
WBGene00001115
WBGene00022271
WBGene00022150
WBGene00022141
WBGene00022139
WBGene00022140
WBGene00021763
WBGene00021238
WBGene00219749
WBGene00021346
WBGene00021348
WBGene00021349
WBGene00004014
WBGene00021470
WBGene00021467
WBGene00021476
WBGene00021475
WBGene00021466
WBGene00021465
WBGene00003156
WBGene00021460
WBGene00017734
WBGene00017738
WBGene00017733
WBGene00001232
WBGene00021270
WBGene00000800
WBGene00000801
WBGene00000788
WBGene00004920
WBGene00022127
WBGene00004043
WBGene00199103
WBGene00196235
WBGene00022116
WBGene00022117
WBGene00022114
WBGene00022110
WBGene00001046
WBGene00021843
WBGene00021845
WBGene00003387
WBGene00019595
WBGene00019598
WBGene00006888
WBGene00021829
WBGene00021831
WBGene00021832
WBGene00000413
WBGene00020915
WBGene00021549
WBGene00021038
WBGene00019362
WBGene00004775
WBGene00021639
WBGene00021640
WBGene00021633
WBGene00044436
WBGene00021649
WBGene00000284
WBGene00020902
WBGene00023156
WBGene00000368
WBGene00004272
WBGene00166332
WBGene00003040
WBGene00001601
WBGene00004147
WBGene00020466
WBGene00004368
WBGene00016322
WBGene00016321
WBGene00004217
WBGene00016326
WBGene00003797
WBGene00044423
WBGene00018764
WBGene00020190
WBGene00001832
WBGene00020185
WBGene00020193
WBGene00020625
WBGene00020653
WBGene00020652
WBGene00000197
WBGene00006805
WBGene00000867
WBGene00017085
WBGene00017088
WBGene00020035
WBGene00020037
WBGene00020038
WBGene00020031
WBGene00004093
WBGene00001985
WBGene00022830
WBGene00000962
WBGene00016564
WBGene00016561
WBGene00020131
WBGene00022473
WBGene00022474
WBGene00022475
WBGene00017003
WBGene00017007
WBGene00017011
WBGene00016655
WBGene00015009
WBGene00015010
WBGene00015007
WBGene00006961
WBGene00007053
WBGene00021112
WBGene00202449
WBGene00015691
WBGene00015698
WBGene00044809
WBGene00019768
WBGene00019767
WBGene00019771
WBGene00019013
WBGene00002034
WBGene00017671
WBGene00017675
WBGene00017676
WBGene00000155
WBGene00001117
WBGene00000502
WBGene00003924
WBGene00022460
WBGene00022462
WBGene00003132
WBGene00022458
WBGene00022457
WBGene00022456
WBGene00004094
WBGene00002804
WBGene00001833
WBGene00004955
WBGene00003792
WBGene00015095
WBGene00015312
WBGene00000965
WBGene00015313
WBGene00002717
WBGene00018595
WBGene00018864
WBGene00018866
WBGene00197234
WBGene00018867
WBGene00018862
WBGene00198089
WBGene00198102
WBGene00201694
WBGene00020262
WBGene00015635
WBGene00006594
WBGene00019692
WBGene00019712
WBGene00002225
WBGene00019711
WBGene00018509
WBGene00000473
WBGene00018511
WBGene00018895
WBGene00018897
WBGene00003793
WBGene00004505
WBGene00044305
WBGene00001856
WBGene00000772
WBGene00001600
WBGene00001973
WBGene00016333
WBGene00018009
WBGene00018008
WBGene00004109
WBGene00000099
WBGene00015504
WBGene00015505
WBGene00004380
WBGene00202331
WBGene00016156
WBGene00016158
WBGene00016159
WBGene00001819
WBGene00201754
WBGene00022752
WBGene00220243
WBGene00020842
WBGene00020843
WBGene00020839
WBGene00003878
WBGene00201096
WBGene00023135
WBGene00200521
WBGene00020376
WBGene00020348
WBGene00206356
WBGene00020346
WBGene00020349
WBGene00003059
WBGene00202405
WBGene00201435
WBGene00199670
WBGene00002073
WBGene00017816
WBGene00000254
WBGene00019394
WBGene00019399
WBGene00001596
WBGene00004721
WBGene00020742
WBGene00003798
WBGene00019432
WBGene00019433
WBGene00019431
WBGene00000386
WBGene00016944
WBGene00016942
WBGene00016947
WBGene00020412
WBGene00000896
WBGene00019003
WBGene00019002
WBGene00019001
WBGene00002783
WBGene00006624
WBGene00017065
WBGene00170698
WBGene00020709
WBGene00020933
WBGene00003170
WBGene00020932
WBGene00020936
WBGene00017240
WBGene00004111
WBGene00000871
WBGene00016492
WBGene00004110
WBGene00016494
WBGene00017098
WBGene00019247
WBGene00019246
WBGene00001598
WBGene00006423
WBGene00004879
WBGene00016741
WBGene00016745
WBGene00020399
WBGene00020403
WBGene00016263
WBGene00010371
WBGene00003964
WBGene00008852
WBGene00012164
WBGene00007024
WBGene00012167
WBGene00002198
WBGene00003815
WBGene00004186
WBGene00009052
WBGene00043279
WBGene00009054
WBGene00010427
WBGene00010645
WBGene00010641
WBGene00006963
WBGene00003622
WBGene00007255
WBGene00007258
WBGene00171678
WBGene00000963
WBGene00003041
WBGene00000275
WBGene00167822
WBGene00009004
WBGene00008767
WBGene00008768
WBGene00009915
WBGene00001680
WBGene00009918
WBGene00009919
WBGene00002136
WBGene00006754
WBGene00007042
WBGene00000496
WBGene00008411
WBGene00004178
WBGene00008419
WBGene00004508
WBGene00001214
WBGene00011975
WBGene00011969
WBGene00001647
WBGene00009187
WBGene00009188
WBGene00014746
WBGene00009191
WBGene00009189
WBGene00003818
WBGene00008399
WBGene00009270
WBGene00009277
WBGene00220041
WBGene00011231
WBGene00011232
WBGene00010113
WBGene00008991
WBGene00003777
WBGene00011912
WBGene00011915
WBGene00011916
WBGene00002179
WBGene00000869
WBGene00010560
WBGene00045192
WBGene00010569
WBGene00077768
WBGene00012113
WBGene00011376
WBGene00045370
WBGene00013958
WBGene00045150
WBGene00003788
WBGene00003183
WBGene00199946
WBGene00009922
WBGene00004439
WBGene00007911
WBGene00003596
WBGene00008531
WBGene00008530
WBGene00008532
WBGene00008387
WBGene00010500
WBGene00197950
WBGene00011033
WBGene00011035
WBGene00009665
WBGene00000777
WBGene00009671
WBGene00000890
WBGene00006377
WBGene00009563
WBGene00010621
WBGene00195888
WBGene00010623
WBGene00006577
WBGene00000409
WBGene00003925
WBGene00044614
WBGene00007974
WBGene00007976
WBGene00007977
WBGene00007979
WBGene00008440
WBGene00006574
WBGene00003052
WBGene00200441
WBGene00006324
WBGene00009455
WBGene00009456
WBGene00009460
WBGene00009250
WBGene00002035
WBGene00011629
WBGene00044684
WBGene00219450
WBGene00009962
WBGene00001568
WBGene00007026
WBGene00004953
WBGene00195394
WBGene00009477
WBGene00200427
WBGene00004839
WBGene00011532
WBGene00003182
WBGene00001574
WBGene00012376
WBGene00014115
WBGene00014117
WBGene00003209
WBGene00014119
WBGene00009127
WBGene00001167
WBGene00009126
WBGene00008107
WBGene00009499
WBGene00014325
WBGene00196638
WBGene00008780
WBGene00009173
WBGene00009174
WBGene00004268
WBGene00198816
WBGene00219811
WBGene00003026
WBGene00010858
WBGene00008877
WBGene00008876
WBGene00044236
WBGene00003904
WBGene00007645
WBGene00006681
WBGene00004808
WBGene00004807
WBGene00009264
WBGene00006062
WBGene00009267
WBGene00004887
WBGene00077771
WBGene00008062
WBGene00044987
WBGene00010617
WBGene00010609
WBGene00010610
WBGene00199280
WBGene00002070
WBGene00004312
WBGene00011489
WBGene00002027
WBGene00007277
WBGene00003800
WBGene00007275
WBGene00002069
WBGene00007299
WBGene00007620
WBGene00202237
WBGene00006352
WBGene00009159
WBGene00006528
WBGene00000371
WBGene00010730
WBGene00010731
WBGene00014533
WBGene00009937
WBGene00013694
WBGene00011986
WBGene00007043
WBGene00201202
WBGene00001226
WBGene00006379
WBGene00001941
WBGene00011945
WBGene00196917
WBGene00219788
WBGene00013698
WBGene00014965
WBGene00013703
WBGene00007705
WBGene00007706
WBGene00236800
WBGene00077526
WBGene00007709
WBGene00000931
WBGene00007711
WBGene00013709
WBGene00013711
WBGene00013710
WBGene00013892
WBGene00220261
WBGene00013894
WBGene00009744
WBGene00201383
WBGene00009112
WBGene00199523
WBGene00009113
WBGene00199005
WBGene00013725
WBGene00009507
WBGene00010325
WBGene00009121
WBGene00006720
WBGene00045162
WBGene00003926
WBGene00009123
WBGene00003083
WBGene00044070
WBGene00016622
WBGene00255714
WBGene00001228
WBGene00015236
WBGene00001432
WBGene00016392
WBGene00016393
WBGene00016387
WBGene00004466
WBGene00002191
WBGene00000912
WBGene00018849
WBGene00016460
WBGene00235254
WBGene00044262
WBGene00013129
WBGene00001980
WBGene00004706
WBGene00219923
WBGene00012317
WBGene00013177
WBGene00013178
WBGene00000410
WBGene00001215
WBGene00007766
WBGene00009315
WBGene00008858
WBGene00004963
WBGene00006807
WBGene00007640
WBGene00001045
WBGene00012955
WBGene00012956
WBGene00011155
WBGene00006707
WBGene00011059
WBGene00014915
WBGene00195605
WBGene00196418
WBGene00197177
WBGene00013137
WBGene00014916
WBGene00014917
WBGene00010244
WBGene00002000
WBGene00000544
WBGene00005525
WBGene00195596
WBGene00007602
WBGene00001640
WBGene00012104
WBGene00004181
WBGene00012208
WBGene00012216
WBGene00045509
WBGene00014510
WBGene00006700
WBGene00001746
WBGene00012481
WBGene00003905
WBGene00012485
WBGene00001433
WBGene00001427
WBGene00003989
WBGene00008130
WBGene00008131
WBGene00006529
WBGene00003948
WBGene00004196
WBGene00003675
WBGene00014994
WBGene00006595
WBGene00014503
WBGene00197781
WBGene00012345
WBGene00012344
WBGene00007215
WBGene00012289
WBGene00012738
WBGene00013021
WBGene00013019
WBGene00013604
WBGene00013595
WBGene00012351
WBGene00006793
WBGene00012353
WBGene00012354
WBGene00012371
WBGene00012236
WBGene00012241
WBGene00013510
WBGene00044975
WBGene00197032
WBGene00198066
WBGene00013405
WBGene00006565
WBGene00001047
WBGene00014103
WBGene00013667
WBGene00000158
WBGene00013674
WBGene00001365
WBGene00013683
WBGene00013682
WBGene00002978
WBGene00013689
WBGene00013688
WBGene00013690
WBGene00013200
WBGene00010579
WBGene00010584
WBGene00010583
WBGene00043308
WBGene00009558
WBGene00001488
WBGene00013970
WBGene00009367
WBGene00009287
WBGene00015285
WBGene00004504
WBGene00044420
WBGene00198534
WBGene00020796
WBGene00220095
WBGene00018586
WBGene00015191
WBGene00015408
WBGene00015645
WBGene00021097
WBGene00021093
WBGene00021100
WBGene00019498
WBGene00017874
WBGene00000106
WBGene00018572
WBGene00000112
WBGene00018974
WBGene00006924
WBGene00197171
WBGene00044424
WBGene00021781
WBGene00019209
WBGene00020362
WBGene00018661
WBGene00019134
WBGene00019141
WBGene00198765
WBGene00018785
WBGene00018782
WBGene00018383
WBGene00003300
WBGene00219707
WBGene00197438
WBGene00044367
WBGene00017914
WBGene00017916
WBGene00003709
WBGene00197619
WBGene00023203
WBGene00023204
WBGene00022453
WBGene00022452
WBGene00021295
WBGene00021292
WBGene00195073
WBGene00017460
WBGene00017456
WBGene00022930
WBGene00015843
WBGene00021721
WBGene00021715
WBGene00023164
WBGene00018806
WBGene00018807
WBGene00021192
WBGene00021191
WBGene00004467
WBGene00023318
WBGene00021055
WBGene00015817
WBGene00015819
WBGene00021795
WBGene00003825
WBGene00022739
WBGene00200106
WBGene00017369
WBGene00004737
WBGene00006817
WBGene00017372
WBGene00006626
WBGene00018270
WBGene00001027
WBGene00019890
WBGene00019893
WBGene00007012
WBGene00022765
WBGene00022759
WBGene00003949
WBGene00006737
WBGene00194986
WBGene00019087
WBGene00018015
WBGene00018018
WBGene00206373
WBGene00001102
WBGene00004040
WBGene00202400
WBGene00016162
WBGene00001101
WBGene00004023
WBGene00022781
WBGene00022782
WBGene00006923
WBGene00017288
WBGene00017286
WBGene00017285
WBGene00017284
WBGene00017282
WBGene00003583
WBGene00017138
WBGene00017132
WBGene00017217
WBGene00000935
WBGene00197976
WBGene00202061
WBGene00018961
WBGene00017397
WBGene00001511
WBGene00000375
WBGene00022673
WBGene00198217
WBGene00270322
WBGene00000383
WBGene00195182
WBGene00019121
WBGene00235270
WBGene00019120
WBGene00006988
WBGene00016121
WBGene00016113
WBGene00016111
WBGene00015943
WBGene00004267
WBGene00022883
WBGene00002268
WBGene00018872
WBGene00018869
WBGene00019129
WBGene00004306
WBGene00020027
WBGene00001401
WBGene00001402
WBGene00017686
WBGene00017683
WBGene00016236
WBGene00016235
WBGene00200121
WBGene00016244
WBGene00077732
WBGene00020783
WBGene00004015
WBGene00017441
WBGene00017435
WBGene00016313
WBGene00016316
WBGene00002980
WBGene00016318
WBGene00019608
WBGene00003009
WBGene00019427
WBGene00020897
WBGene00020895
WBGene00020899
WBGene00016971
WBGene00007050
WBGene00017559
WBGene00016964
WBGene00016961
WBGene00016967
WBGene00003480
WBGene00023138
WBGene00020500
WBGene00018305
WBGene00020482
WBGene00020481
WBGene00020478
WBGene00004921
WBGene00001194
WBGene00206529
WBGene00001023
WBGene00016625
WBGene00016632
WBGene00166760
WBGene00196542
WBGene00017700
WBGene00017699
WBGene00017702
WBGene00198924
WBGene00196089
WBGene00015797
WBGene00015795
WBGene00219664
WBGene00006831
WBGene00016890
WBGene00022854
WBGene00022852
WBGene00022850
WBGene00022856
WBGene00001872
WBGene00002238
WBGene00002183
WBGene00020163
WBGene00017349
WBGene00017350
WBGene00017347
WBGene00195030
WBGene00020320
WBGene00001597
WBGene00020318
WBGene00016173
WBGene00003966
WBGene00017125
WBGene00045095
WBGene00017967
WBGene00004244
WBGene00001812
WBGene00018395
WBGene00018391
WBGene00015567
WBGene00006703
WBGene00022887
WBGene00019941
WBGene00019940
WBGene00043050
WBGene00000390
WBGene00017548
WBGene00017546
WBGene00003045
WBGene00003044
WBGene00017549
WBGene00015203
WBGene00015208
WBGene00022896
WBGene00015064
WBGene00015513
WBGene00015515
WBGene00000517
WBGene00011636
WBGene00011637
WBGene00002994
WBGene00011638
WBGene00011348
WBGene00011350
WBGene00004208
WBGene00014054
WBGene00008436
WBGene00006996
WBGene00007433
WBGene00006724
WBGene00007435
WBGene00011507
WBGene00006734
WBGene00011511
WBGene00010502
WBGene00003089
WBGene00008052
WBGene00008053
WBGene00008642
WBGene00008641
WBGene00001281
WBGene00004510
WBGene00000377
WBGene00002066
WBGene00000894
WBGene00009404
WBGene00202033
WBGene00001571
WBGene00010459
WBGene00003821
WBGene00000379
WBGene00004304
WBGene00007744
WBGene00008800
WBGene00001230
WBGene00006994
WBGene00011759
WBGene00002065
WBGene00045125
WBGene00010042
WBGene00004241
WBGene00009203
WBGene00000773
WBGene00008431
WBGene00008430
WBGene00000887
WBGene00011311
WBGene00010682
WBGene00002295
WBGene00009784
WBGene00009783
WBGene00011578
WBGene00011580
WBGene00201815
WBGene00202113
WBGene00000378
WBGene00011884
WBGene00011885
WBGene00011887
WBGene00011886
WBGene00007686
WBGene00003870
WBGene00009713
WBGene00006514
WBGene00200154
WBGene00011980
WBGene00011976
WBGene00011977
WBGene00000532
WBGene00012002
WBGene00011965
WBGene00011967
WBGene00199145
WBGene00014210
WBGene00014208
WBGene00008402
WBGene00004286
WBGene00009627
WBGene00044170
WBGene00011849
WBGene00003231
WBGene00199528
WBGene00001038
WBGene00001510
WBGene00005026
WBGene00014259
WBGene00013139
WBGene00006940
WBGene00194906
WBGene00013143
WBGene00003785
WBGene00000178
WBGene00007463
WBGene00007330
WBGene00007334
WBGene00007333
WBGene00011273
WBGene00011275
WBGene00002265
WBGene00002497
WBGene00014164
WBGene00014165
WBGene00001686
WBGene00009364
WBGene00011039
WBGene00011333
WBGene00200603
WBGene00001531
WBGene00007412
WBGene00007419
WBGene00195392
WBGene00201527
WBGene00200273
WBGene00198634
WBGene00011662
WBGene00011663
WBGene00014058
WBGene00014060
WBGene00004134
WBGene00195882
WBGene00201928
WBGene00003107
WBGene00011303
WBGene00011304
WBGene00220052
WBGene00045148
WBGene00219803
WBGene00007555
WBGene00010897
WBGene00002297
WBGene00000411
WBGene00003805
WBGene00001153
WBGene00010910
WBGene00010911
WBGene00010912
WBGene00000293
WBGene00000880
WBGene00009701
WBGene00010989
WBGene00010990
WBGene00010991
WBGene00003783
WBGene00000472
WBGene00009353
WBGene00007504
WBGene00003831
WBGene00219809
WBGene00007500
WBGene00009578
WBGene00197803
WBGene00009511
WBGene00199041
WBGene00011524
WBGene00196752
WBGene00011529
WBGene00011464
WBGene00008165
WBGene00008166
WBGene00197412
WBGene00008179
WBGene00007192
WBGene00007193
WBGene00007189
WBGene00007892
WBGene00014850
WBGene00012156
WBGene00012157
WBGene00004699
WBGene00004698
WBGene00012203
WBGene00012206
WBGene00007144
WBGene00195248
WBGene00007013
WBGene00013387
WBGene00201395
WBGene00010053
WBGene00010052
WBGene00010049
WBGene00003960
WBGene00010056
WBGene00008546
WBGene00195441
WBGene00008549
WBGene00013925
WBGene00013926
WBGene00007028
WBGene00008136
WBGene00006617
WBGene00008140
WBGene00001016
WBGene00009656
WBGene00012395
WBGene00003789
WBGene00010785
WBGene00014151
WBGene00003015
WBGene00012222
WBGene00012220
WBGene00004271
WBGene00003228
WBGene00012458
WBGene00003154
WBGene00012466
WBGene00000565
WBGene00014576
WBGene00013256
WBGene00004167
WBGene00013269
WBGene00002063
WBGene00013273
WBGene00013287
WBGene00000660
WBGene00200352
WBGene00012584
WBGene00012602
WBGene00012896
WBGene00077635
WBGene00012903
WBGene00012909
WBGene00009390
WBGene00010264
WBGene00010263
WBGene00012608
WBGene00200302
WBGene00197188
WBGene00004242
WBGene00013591
WBGene00001998
WBGene00012375
WBGene00002264
WBGene00012992
WBGene00045410
WBGene00010071
WBGene00000804
WBGene00001764
WBGene00007837
WBGene00012999
WBGene00013208
WBGene00013210
WBGene00001916
WBGene00008576
WBGene00045119
WBGene00013093
WBGene00013094
WBGene00013096
WBGene00012723
WBGene00198462
WBGene00014851
WBGene00012188
WBGene00002275
WBGene00014569
WBGene00012978
WBGene00006964
WBGene00012983
WBGene00012982
WBGene00201670
WBGene00013214
WBGene00013221
WBGene00011050
WBGene00011051
WBGene00002076
WBGene00009179
WBGene00009180
WBGene00194892
WBGene00010551
WBGene00007545
WBGene00006856
WBGene00010758
WBGene00010193
WBGene00044053
WBGene00006381
WBGene00001225
WBGene00012182
WBGene00003651
WBGene00011043
WBGene00013150
WBGene00013156
WBGene00013158
WBGene00013165
WBGene00013168
WBGene00021597
WBGene00003931
WBGene00003510
WBGene00006715
WBGene00021754
WBGene00021756
WBGene00017328
WBGene00002269
WBGene00044318
WBGene00000882
WBGene00018364
WBGene00004388
WBGene00020761
WBGene00020763
WBGene00017759
WBGene00017763
WBGene00017757
WBGene00020450
WBGene00004277
WBGene00003917
WBGene00004891
WBGene00022103
WBGene00022493
WBGene00022484
WBGene00022347
WBGene00001236
WBGene00022348
WBGene00022335
WBGene00019716
WBGene00004894
WBGene00199059
WBGene00002025
WBGene00021264
WBGene00023364
WBGene00201846
WBGene00006513
WBGene00021444
WBGene00202187
WBGene00019199
WBGene00021020
WBGene00021019
WBGene00017101
WBGene00004884
WBGene00220200
WBGene00022172
WBGene00022169
WBGene00018991
WBGene00018990
WBGene00019157
WBGene00000898
WBGene00021820
WBGene00020103
WBGene00003372
WBGene00010304
WBGene00003795
WBGene00010302
WBGene00007923
WBGene00007924
WBGene00010814
WBGene00010810
WBGene00003962
WBGene00007573
WBGene00007574
WBGene00007578
WBGene00007580
WBGene00009373
WBGene00009374
WBGene00003476
WBGene00007966
WBGene00000264
WBGene00007969
WBGene00014204
WBGene00011215
WBGene00007983
WBGene00006537
WBGene00001943
WBGene00198145
WBGene00002202
WBGene00004392
WBGene00007273
WBGene00007630
WBGene00007625
WBGene00220047
WBGene00001034
WBGene00006959
WBGene00011279
WBGene00011280
WBGene00011281
WBGene00011282
WBGene00009649
WBGene00011604
WBGene00003157
WBGene00001352
WBGene00010428
WBGene00007135
WBGene00007136
WBGene00011111
WBGene00011116
WBGene00007791
WBGene00199870
WBGene00007788
WBGene00007789
WBGene00014402
WBGene00004132
WBGene00000465
WBGene00000380
WBGene00009115
WBGene00010909
WBGene00010908
WBGene00003915
WBGene00009440
WBGene00004762
WBGene00009441
WBGene00004874
WBGene00000206
WBGene00004760
WBGene00200624
WBGene00011953
WBGene00011408
WBGene00011410
WBGene00001259
WBGene00007167
WBGene00045374
WBGene00008003
WBGene00003210
WBGene00008005
WBGene00003912
WBGene00017801
WBGene00016444
WBGene00016446
WBGene00016449
WBGene00017826
WBGene00005011
WBGene00017825
WBGene00017830
WBGene00006735
WBGene00004782
WBGene00016145
WBGene00016143
WBGene00016142
WBGene00043156
WBGene00197874
WBGene00016165
WBGene00020095
WBGene00020098
WBGene00020097
WBGene00020092
WBGene00016676
WBGene00000107
WBGene00018802
WBGene00004728
WBGene00006543
WBGene00021901
WBGene00001744
WBGene00020423
WBGene00220017
WBGene00189952
WBGene00022531
WBGene00022534
WBGene00003588
WBGene00016408
WBGene00001660
WBGene00022599
WBGene00006590
WBGene00201617
WBGene00003391
WBGene00021313
WBGene00020779
WBGene00018612
WBGene00018613
WBGene00044410
WBGene00003901
WBGene00019833
WBGene00019831
WBGene00017031
WBGene00017301
WBGene00018967
WBGene00018963
WBGene00000420
WBGene00001514
WBGene00000518
WBGene00003918
WBGene00018830
WBGene00004481
WBGene00015146
WBGene00015147
WBGene00006359
WBGene00015148
WBGene00015149
WBGene00015143
WBGene00000182
WBGene00199402
WBGene00006943
WBGene00015084
WBGene00002048
WBGene00022899
WBGene00200763
WBGene00021344
WBGene00255596
WBGene00001869
WBGene00007016
WBGene00017162
WBGene00000381
WBGene00000115
WBGene00001057
WBGene00017163
WBGene00017165
WBGene00017166
WBGene00017159
WBGene00017158
WBGene00016200
WBGene00016194
WBGene00219838
WBGene00006727
WBGene00017776
WBGene00017777
WBGene00017775
WBGene00017774
WBGene00003375
WBGene00200919
WBGene00001166
WBGene00220242
WBGene00044412
WBGene00020549
WBGene00021535
WBGene00021531
WBGene00196973
WBGene00018341
WBGene00018339
WBGene00016014
WBGene00016015
WBGene00004472
WBGene00020442
WBGene00020437
WBGene00015978
WBGene00001972
WBGene00002891
WBGene00016981
WBGene00016982
WBGene00016978
WBGene00007048
WBGene00015811
WBGene00002850
WBGene00015814
WBGene00015484
WBGene00015487
WBGene00003214
WBGene00004781
WBGene00020821
WBGene00020823
WBGene00006463
WBGene00004503
WBGene00017751
WBGene00015642
WBGene00017849
WBGene00003162
WBGene00017647
WBGene00015734
WBGene00002169
WBGene00018137
WBGene00018132
WBGene00017904
WBGene00020068
WBGene00044312
WBGene00201979
WBGene00000265
WBGene00019380
WBGene00020316
WBGene00020314
WBGene00002083
WBGene00002845
WBGene00004462
WBGene00018996
WBGene00017951
WBGene00219317
WBGene00004340
WBGene00017952
WBGene00004341
WBGene00201983
WBGene00019811
WBGene00019813
WBGene00022734
WBGene00220259
WBGene00022738
WBGene00015102
WBGene00015104
WBGene00015101
WBGene00015105
WBGene00015099
WBGene00001613
WBGene00019400
WBGene00018152
WBGene00018151
WBGene00018150
WBGene00020112
WBGene00006592
WBGene00020107
WBGene00020636
WBGene00004189
WBGene00015160
WBGene00015156
WBGene00018950
WBGene00018953
WBGene00020601
WBGene00019196
WBGene00196910
WBGene00198566
WBGene00015582
WBGene00015581
WBGene00004420
WBGene00003063
WBGene00020051
WBGene00000846
WBGene00206459
WBGene00022817
WBGene00015989
WBGene00015386
WBGene00003559
WBGene00022795
WBGene00044799
WBGene00015591
WBGene00001209
WBGene00022787
WBGene00000765
WBGene00195236
WBGene00015333
WBGene00022798
WBGene00043051
WBGene00003801
WBGene00004303
WBGene00016207
WBGene00016209
WBGene00045246
WBGene00199731
WBGene00015557
WBGene00000508
WBGene00018409
WBGene00019679
WBGene00000143
WBGene00019458
WBGene00219815
WBGene00015753
WBGene00001565
WBGene00004433
WBGene00016803
WBGene00077516
WBGene00004187
WBGene00016799
WBGene00006772
WBGene00016238
WBGene00002231
WBGene00017319
WBGene00017357
WBGene00017356
WBGene00004726
WBGene00022579
WBGene00006840
WBGene00019881
WBGene00019882
WBGene00196470
WBGene00019877
WBGene00044677
WBGene00022703
WBGene00022697
WBGene00022864
WBGene00022865
WBGene00016250
WBGene00004460
WBGene00199676
WBGene00018366
WBGene00201658
WBGene00015747
WBGene00017696
WBGene00001688
WBGene00006662
WBGene00017698
WBGene00015125
WBGene00015128
WBGene00015129
WBGene00022718
WBGene00200271
WBGene00003253
WBGene00019800
WBGene00006975
WBGene00018423
WBGene00018422
WBGene00004041
WBGene00174886
WBGene00002998
WBGene00014036
WBGene00014034
WBGene00011142
WBGene00011143
WBGene00001227
WBGene00011146
WBGene00199513
WBGene00010309
WBGene00185006
WBGene00006977
WBGene00004269
WBGene00011300
WBGene00000549
WBGene00003001
WBGene00008514
WBGene00001609
WBGene00014624
WBGene00000863
WBGene00013850
WBGene00045368
WBGene00004391
WBGene00010796
WBGene00000770
WBGene00001689
WBGene00004343
WBGene00206420
WBGene00010036
WBGene00001284
WBGene00010040
WBGene00010038
WBGene00004980
WBGene00007186
WBGene00007188
WBGene00007187
WBGene00000268
WBGene00007185
WBGene00001094
WBGene00003067
WBGene00010131
WBGene00000550
WBGene00014218
WBGene00014221
WBGene00194691
WBGene00008174
WBGene00010227
WBGene00004180
WBGene00010229
WBGene00001831
WBGene00006540
WBGene00006704
WBGene00007400
WBGene00199493
WBGene00006579
WBGene00003572
WBGene00000405
WBGene00011503
WBGene00000366
WBGene00005021
WBGene00006911
WBGene00003158
WBGene00000567
WBGene00200099
WBGene00003035
WBGene00014017
WBGene00010781
WBGene00010779
WBGene00010783
WBGene00010784
WBGene00014075
WBGene00009594
WBGene00196334
WBGene00007010
WBGene00004344
WBGene00011804
WBGene00011806
WBGene00011819
WBGene00014228
WBGene00201285
WBGene00011867
WBGene00011868
WBGene00004326
WBGene00001002
WBGene00006802
WBGene00011562
WBGene00003589
WBGene00003225
WBGene00011560
WBGene00044069
WBGene00010842
WBGene00010363
WBGene00008422
WBGene00000231
WBGene00008423
WBGene00185048
WBGene00012859
WBGene00012641
WBGene00012648
WBGene00012650
WBGene00219614
WBGene00012360
WBGene00010479
WBGene00004361
WBGene00010478
WBGene00010481
WBGene00199783
WBGene00197424
WBGene00219601
WBGene00000475
WBGene00008078
WBGene00008079
WBGene00012965
WBGene00012964
WBGene00012358
WBGene00012976
WBGene00012977
WBGene00012936
WBGene00006604
WBGene00012928
WBGene00012934
WBGene00012126
WBGene00003975
WBGene00014535
WBGene00004960
WBGene00013445
WBGene00013443
WBGene00013437
WBGene00013436
WBGene00013432
WBGene00013431
WBGene00012756
WBGene00196982
WBGene00006396
WBGene00003802
WBGene00013236
WBGene00013228
WBGene00013242
WBGene00006937
WBGene00000201
WBGene00013553
WBGene00006571
WBGene00001946
WBGene00220172
WBGene00004506
WBGene00014902
WBGene00013034
WBGene00004027
WBGene00013038
WBGene00013039
WBGene00013040
WBGene00013042
WBGene00013729
WBGene00013734
WBGene00007030
WBGene00013735
WBGene00013738
WBGene00013740
WBGene00007027
WBGene00000203
WBGene00012551
WBGene00012553
WBGene00012713
WBGene00014176
WBGene00014177
WBGene00012718
WBGene00012716
WBGene00001630
WBGene00197962
WBGene00010139
WBGene00000774
WBGene00219977
WBGene00012802
WBGene00002229
WBGene00003829
WBGene00002059
WBGene00009952
WBGene00009953
WBGene00011399
WBGene00011398
WBGene00009736
WBGene00012097
WBGene00004075
WBGene00013574
WBGene00011475
WBGene00011735
WBGene00011734
WBGene00011730
WBGene00011729
WBGene00195344
WBGene00170628
WBGene00010665
WBGene00197401
WBGene00003967
WBGene00000674
WBGene00019820
WBGene00001071
WBGene00001735
WBGene00022048
WBGene00004981
WBGene00020295
WBGene00001338
WBGene00020298
WBGene00020297
WBGene00165558
WBGene00000913
WBGene00022046
WBGene00021012
WBGene00015993
WBGene00019664
WBGene00019663
WBGene00195864
WBGene00000677
WBGene00018929
WBGene00004824
WBGene00018935
WBGene00199601
WBGene00202216
WBGene00021943
WBGene00201199
WBGene00021945
WBGene00021939
WBGene00004047
WBGene00043705
WBGene00021926
WBGene00021922
WBGene00021934
WBGene00016796
WBGene00007476
WBGene00002180
WBGene00003794
WBGene00000416
WBGene00021512
WBGene00021511
WBGene00019538
WBGene00003947
WBGene00019462
WBGene00018681
WBGene00044466
WBGene00020208
WBGene00021418
WBGene00021423
WBGene00021421
WBGene00022092
WBGene00022089
WBGene00022077
WBGene00022101
WBGene00003161
WBGene00022075
WBGene00022100
WBGene00195990
WBGene00022074
WBGene00022376
WBGene00022382
WBGene00022381
WBGene00021877
WBGene00169683
WBGene00023182
WBGene00044487
WBGene00201830
WBGene00021883
WBGene00021886
WBGene00006708
WBGene00021888
WBGene00022069
WBGene00022067
WBGene00003153
WBGene00197636
WBGene00019766
WBGene00021088
WBGene00021082
WBGene00018328
WBGene00001999
WBGene00018323
WBGene00021952
WBGene00015251
WBGene00015248
WBGene00015651
WBGene00006769
WBGene00003889
WBGene00022608
WBGene00198923
WBGene00021359
WBGene00021366
WBGene00019726
WBGene00018064
WBGene00003955
WBGene00016432
WBGene00019439
WBGene00018085
WBGene00000123
WBGene00017482
WBGene00220117
WBGene00005662
WBGene00018898
WBGene00021281
WBGene00019953
WBGene00019946
WBGene00019719
WBGene00022677
WBGene00195011
WBGene00017921
WBGene00004205
WBGene00017920
WBGene00020679
WBGene00023323
WBGene00017119
WBGene00017120
WBGene00021202
WBGene00021201
WBGene00021206
WBGene00044483
WBGene00019163
WBGene00019162
WBGene00006213
WBGene00199124
WBGene00015330
WBGene00015327
WBGene00015329
WBGene00020994
WBGene00020993
WBGene00043064
WBGene00018127
WBGene00018130
WBGene00172423
WBGene00199412
WBGene00021160
WBGene00023359
WBGene00200185
WBGene00018317
WBGene00018321
WBGene00002032
WBGene00022774
WBGene00004374
WBGene00004243
WBGene00001411
WBGene00001093
WBGene00020464
WBGene00171923
WBGene00016955
WBGene00016291
WBGene00015540
WBGene00049487
WBGene00015538
WBGene00019296
WBGene00019295
WBGene00002129
WBGene00006780
WBGene00002245
WBGene00006974
WBGene00016764
WBGene00022250
WBGene00022235
WBGene00004783
WBGene00235289
WBGene00022244
WBGene00022257
WBGene00049235
WBGene00015308
WBGene00004179
WBGene00015310
WBGene00016610
WBGene00199713
WBGene00018161
WBGene00001029
WBGene00017480
WBGene00001090
WBGene00015283
WBGene00003030
WBGene00019259
WBGene00174803
WBGene00199434
WBGene00020234
WBGene00020684
WBGene00195050
WBGene00020683
WBGene00020687
WBGene00003992
WBGene00015553
WBGene00002228
WBGene00006572
WBGene00021544
WBGene00022620
WBGene00016402
WBGene00016405
WBGene00016400
WBGene00004822
WBGene00000292
WBGene00200282
WBGene00001241
WBGene00004477
WBGene00018349
WBGene00198929
WBGene00200456
WBGene00200934
WBGene00202016
WBGene00200187
WBGene00004044
WBGene00018904
WBGene00018900
WBGene00001934
WBGene00001624
WBGene00019899
WBGene00019898
WBGene00003914
WBGene00018636
WBGene00000996
WBGene00018638
WBGene00018635
WBGene00002074
WBGene00017989
WBGene00018468
WBGene00004046
WBGene00017999
WBGene00023487
WBGene00016844
WBGene00016698
WBGene00001827
WBGene00016374
WBGene00044326
WBGene00016378
WBGene00016379
WBGene00002221
WBGene00016384
WBGene00015509
WBGene00015508
WBGene00015510
WBGene00003827
WBGene00016795
WBGene00017643
WBGene00017641
WBGene00172235
WBGene00003178
WBGene00200233
WBGene00021541
WBGene00016130
WBGene00016129
WBGene00016124
WBGene00200461
WBGene00044508
WBGene00021536
WBGene00018358
WBGene00004979
WBGene00197541
WBGene00020374
WBGene00003656
WBGene00019510
WBGene00000923
WBGene00017070
WBGene00019791
WBGene00019788
WBGene00020827
WBGene00219723
WBGene00001566
WBGene00016178
WBGene00044001
WBGene00015650
[truncated: 1,018 more rows]

[truncated: 5 more sheets: F3set9set26H3K4me3diff, set26glp1up, set26glp1down, daf16set26glp1up, daf16set26glp1down]
